# Supplementary material for: Photoinduced hydroxylation of arylboronic acids with molecular oxygen under photocatalyst-free conditions
Source: Royal Society of Chemistry journal article supplement (doi:10.1039/c9gc02229e), 2019-01-01
Supplement: c9gc02229e1.pdf [file c9gc02229e1.pdf]

*Supporting Information for*

**Photoinduced hydroxylation of arylboronic acids with  
molecular oxygen under photocatalyst-free conditions**

Yu-Ting Xu, Chen-Yuan Li, Xiao-Bo Huang, Wen-Xia Gao, Yun-  
Bing Zhou,\* Miao-Chang Liu\* and Hua-Yue Wu

College of Chemistry and Materials Engineering, Wenzhou  
University, Wenzhou 325035, China. E-mail: zyb@wzu.edu.cn;  
mcl@wzu.edu.cn

**Table of Contents**

|                                                                  |     |
|------------------------------------------------------------------|-----|
| <b>1.General Information</b> .....                               | S1  |
| <b>2.Experimental Section</b> .....                              | S2  |
| <b>2.1 Optimization of Reaction Conditions<sup>a</sup></b> ..... | S2  |
| <b>2.2 General Procedure for Synthesis of Phenols</b> .....      | S3  |
| <b>3.<sup>18</sup>O-Labeling Experiments</b> .....               | S4  |
| <b>4.Controlled Experiment</b> .....                             | S5  |
| <b>5.Characterization of Products in Details</b> .....           | S7  |
| <b>6.NMR spectra</b> .....                                       | S20 |

## 1. General Information

Unless otherwise noted, all materials were obtained from commercial suppliers (TCI, Sigma-Aldrich, Alfa Aesar, Acros and Meryer) and used without further purification. All reactions were conducted using standard Schlenk techniques. A 15W UV lamp was used for photoirradiation. Column chromatography was performed using EM silica gel 60 (300–400 mesh).  $^1\text{H}$  NMR,  $^{13}\text{C}$  NMR and  $^{19}\text{F}$  NMR spectra were measured on a 500 MHz Bruker AVANCE spectrometer (500 MHz for  $^1\text{H}$ , 125 MHz for  $^{13}\text{C}$  and 470 MHz for  $^{19}\text{F}$ ), or 400 MHz Zhongke-Niujin spectrometer (400 MHz for  $^1\text{H}$  and 100 MHz for  $^{13}\text{C}$ ), using  $\text{DMSO-}d_6$  or  $\text{CDCl}_3$  as the solvent with tetramethylsilane (TMS) as the internal standard at room temperature. Chemical shifts  $\delta$  were given in ppm, the coupling constants  $J$  were given in Hz. Peak multiplicities were designated by the following abbreviations: s, singlet; d, doublet; t, triplet; m, multiplet.  $^1\text{H}$  NMR spectra were referenced to  $\text{DMSO-}d_6$  (2.50 ppm) or  $\text{CDCl}_3$  (7.28 ppm), and  $^{13}\text{C}$  NMR spectra were referenced to  $\text{DMSO-}d_6$  (39.5 ppm) or  $\text{CDCl}_3$  (77.0 ppm). Analysis of crude reaction mixture was done on the Varian 4000 GC/MS and Agilent 7890A/5975C.

## 2. Experimental Section

### 2.1 Optimization of Reaction Conditions<sup>a</sup>

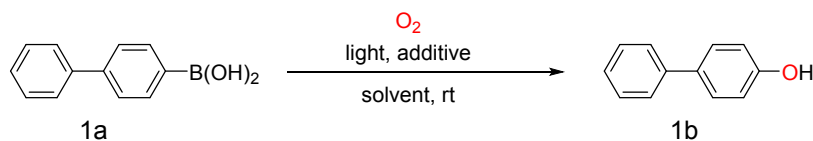

| entry           | light source  | additive      | solvent  | Yield(%) |
|-----------------|---------------|---------------|----------|----------|
| 1               | UV lamp       | --            | DMF      | 23       |
| 2               | UV lamp       | $Et_3N$       | DMF      | 87       |
| 3               | UV lamp       | $Et_3N$       | dioxane  | 40       |
| 4               | UV lamp       | $Et_3N$       | THF      | 53       |
| 5               | UV lamp       | $Et_3N$       | $CH_3CN$ | 77       |
| 6               | UV lamp       | $Et_3N$       | toluene  | 41       |
| 7               | UV lamp       | $Et_3N$       | DCM      | 23       |
| 8               | UV lamp       | $Et_3N$       | DMSO     | 33       |
| 9               | UV lamp       | $Et_3N$       | 2-MeTHF  | 92       |
| 10              | UV lamp       | DIPEA         | 2-MeTHF  | 82       |
| 11              | UV lamp       | $(Me)_2EtN$   | 2-MeTHF  | 83       |
| 12              | UV lamp       | $(Me)_2^iBuN$ | 2-MeTHF  | 65       |
| 13 <sup>b</sup> | UV lamp       | $Et_3N$       | 2-MeTHF  | 58       |
| 14 <sup>c</sup> | UV lamp       | $Et_3N$       | 2-MeTHF  | 0        |
| 15              | filament lamp | $Et_3N$       | 2-MeTHF  | 10       |
| 16              | green LED     | $Et_3N$       | 2-MeTHF  | 83       |
| 17              | blue LED      | $Et_3N$       | 2-MeTHF  | 80       |
| 18              | dark          | $Et_3N$       | 2-MeTHF  | trace    |

<sup>a</sup>Reaction conditions: **1a** (0.3 mmol),  $O_2$  (1 atm), light source (15 W), addition (0.45 mmol), solvent (4 mL), rt, 24 h, isolated yields. <sup>b</sup>Under the air atmosphere. <sup>c</sup>Under the  $N_2$  atmosphere.

## 2.2 General Procedure for Synthesis of Phenols

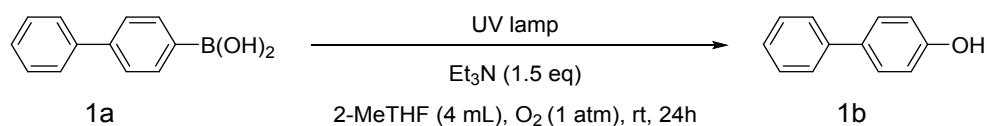

An oven-dried 20 mL quartz test tube equipped with a magnetic stir bar was charged with [1,1'-biphenyl]-4-ylboronic acid (59.4 mg, 0.3 mmol, 1.0 equiv), and the quartz test tube was evacuated and backfilled with  $\text{O}_2$  three times. Under  $\text{O}_2$ ,  $\text{Et}_3\text{N}$  (62.5  $\mu\text{L}$ , 0.45 mmol, 1.5 equiv) and 2-MeTHF (4 mL) were added in turn via syringe. The resulting mixture was stirred for 5 minutes, and then the quartz test tube transferred to photoreactor. The tube was placed approximately 2 cm from a 15 W UV lamp. The reaction mixture was stirred and irradiated for 24 h. After the indicated time period, the crude product was diluted with ethyl ether, filtered through a pad of silica gel and concentrated under reduced pressure. The residue was then purified by flash chromatography on silica gel (EtOAc/PE = 1/10) directly to give the desired product 1b (92% yield, white solid).

### 3. <sup>18</sup>O-Labeling Experiments

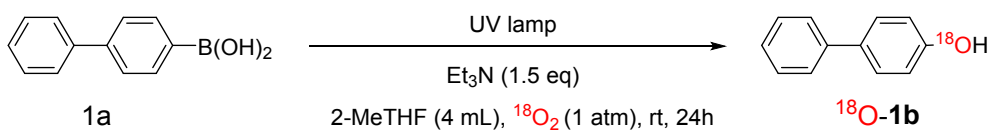

An oven-dried 20 mL quartz test tube equipped with a magnetic stir bar was charged with [1,1'-biphenyl]-4-ylboronic acid (59.4 mg, 0.3 mmol, 1.0 equiv), and the quartz test tube was evacuated and backfilled with <sup>18</sup>O<sub>2</sub> three times. Under <sup>18</sup>O<sub>2</sub>, Et<sub>3</sub>N (62.5 μL, 0.45 mmol, 1.5 equiv) and 2-MeTHF (4 mL) were added in turn via syringe. The resulting mixture was stirred for 5 minutes, and then the quartz test tube was transferred to photoreactor. The tube was placed approximately 2 cm from a 15 W UV lamp. The reaction mixture was stirred and irradiated for 24 h. After the indicated time period, the crude product was diluted with ethyl ether, filtered through a pad of silica gel and concentrated under reduced pressure. The residue was then purified by flash chromatography on silica gel directly to give the desired product <sup>18</sup>O-1b.

The GC-MS shows a m/z peak of 172, which is in good agreement with that of <sup>18</sup>O-1b

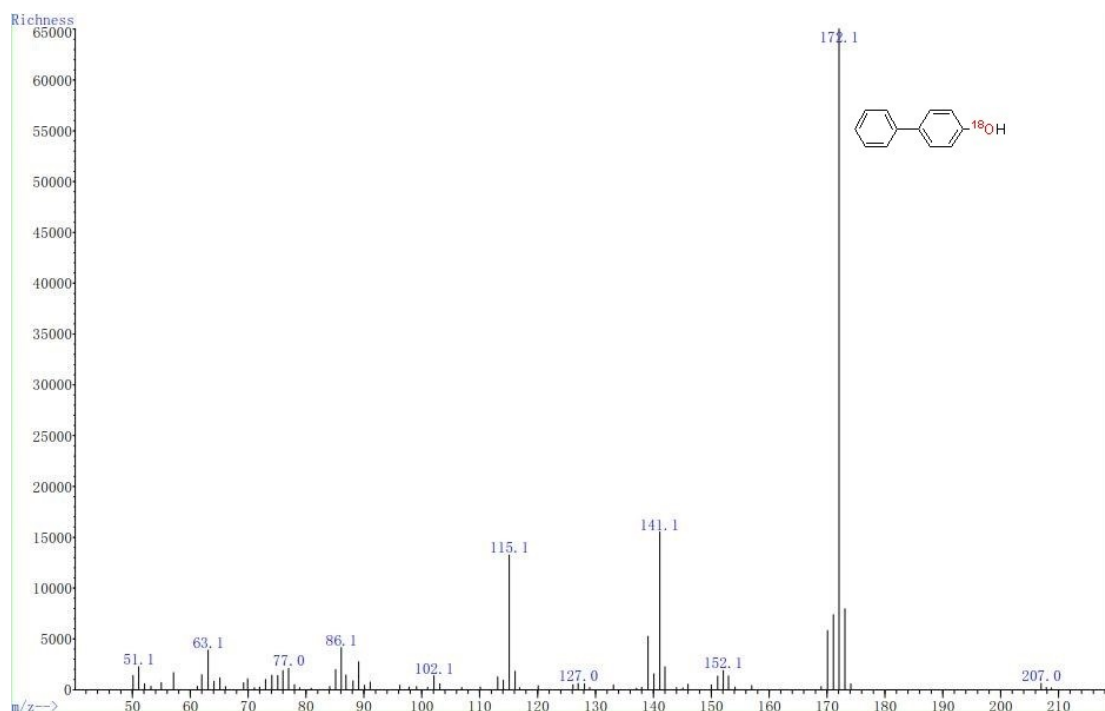

## 4. Controlled Experiment

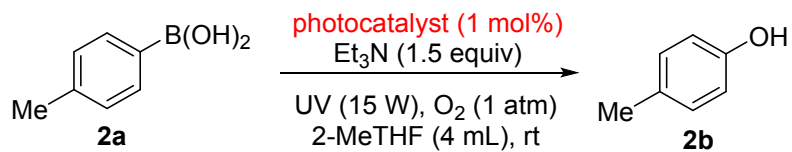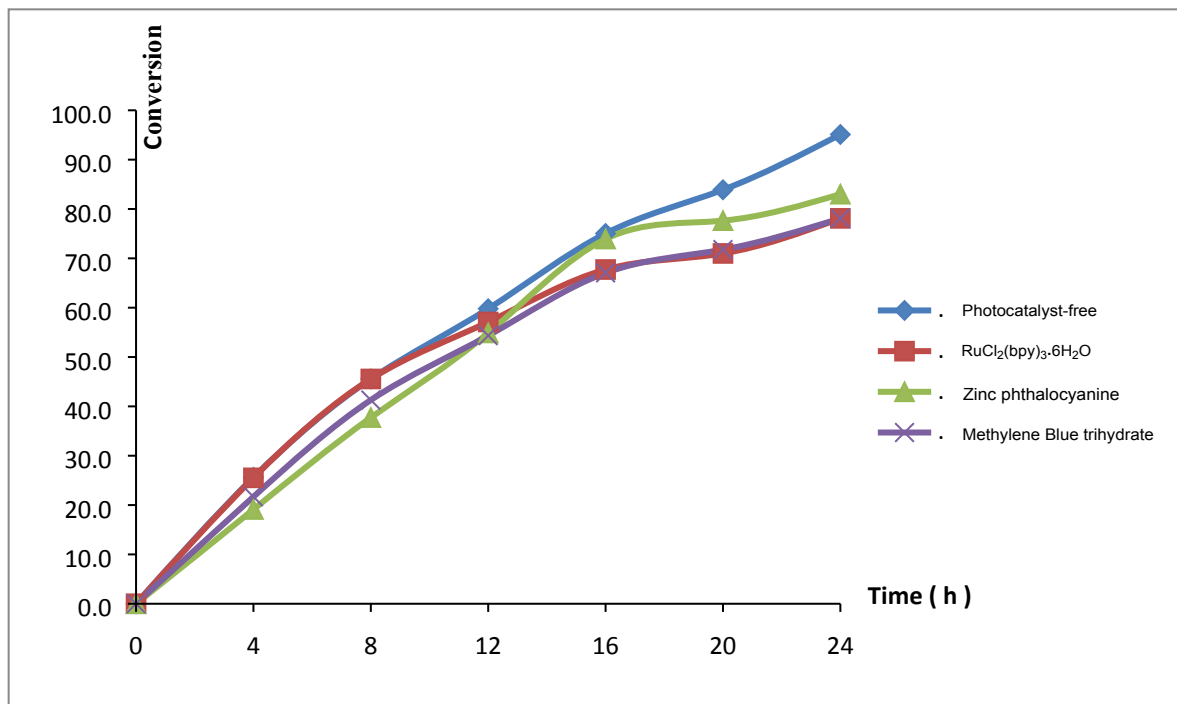

**Figure S1.** Conversion vs time plot for the reactions of **2a** with different photocatalysts or without photocatalyst. The conversion was determined by GC.

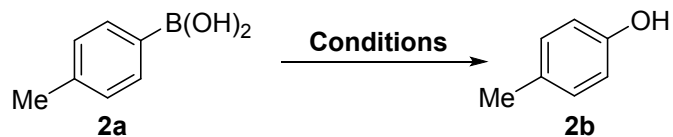

**Condition A (standard reaction condition):** Et<sub>3</sub>N (1.5 equiv), UV (15 W), O<sub>2</sub> (1 atm), 2-MeTHF (4 mL), rt;

**Condition B:** Et<sub>3</sub>N (1.5 equiv), 2,6-dimethyl phenol **36b** (1.5 equiv), UV (15 W), O<sub>2</sub> (1 atm), 2-MeTHF (4 mL), rt;

**Condition C:** 2,6-dimethyl phenol **36b** (1.5 equiv), UV (15 W), O<sub>2</sub> (1 atm), 2-MeTHF (4 mL), rt;

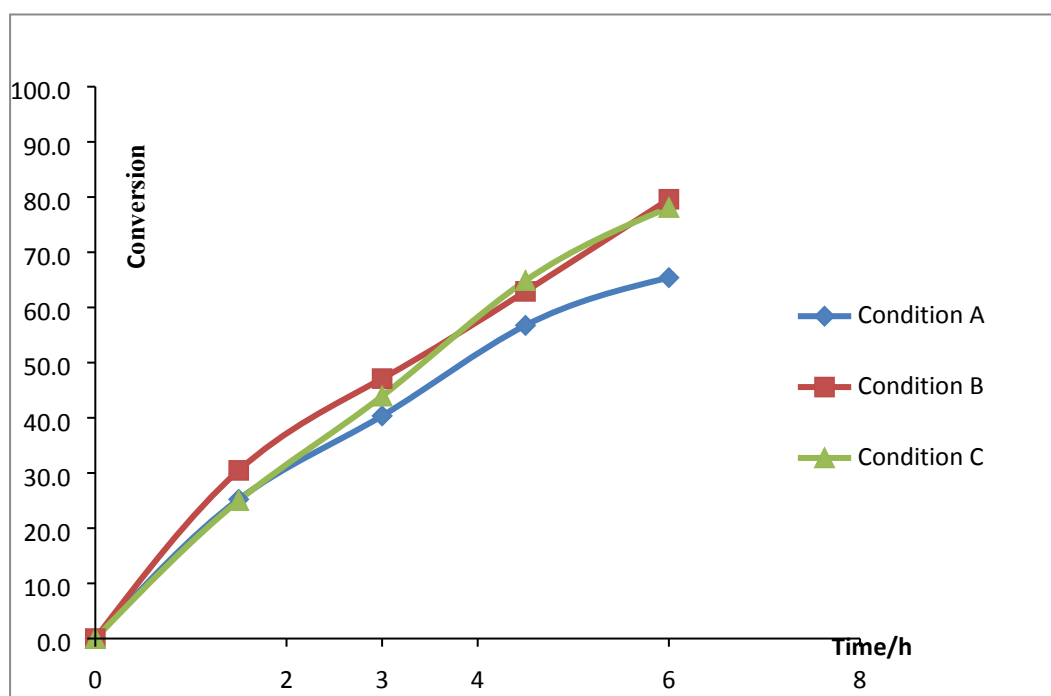

**Figure S2.** Conversion vs time plot for the reaction of **2a** under different conditions. The conversion was determined by GC.

## 5. Characterization of Products in Details

### 4-Phenylphenol (1b)<sup>[1]</sup>

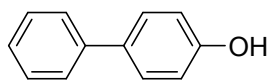

White solid (46.9 mg, 92% yield); EtOAc/PE = 1/10. <sup>1</sup>H NMR (400 MHz, DMSO-*d*<sub>6</sub>) δ 9.61 (s, 1H), 7.60 (d, *J* = 8.0 Hz, 2H), 7.52 (d, *J* = 8.8 Hz, 2H), 7.45-7.41 (m, 2H), 7.32-7.28 (m, 1H), 6.89 (d, *J* = 8.8 Hz, 2H); <sup>13</sup>C NMR (125 MHz, DMSO-*d*<sub>6</sub>) δ 157.1, 140.2, 130.9, 128.7, 127.7, 126.3, 125.9, 115.7.

### p-Cresol (2b)<sup>[1]</sup>

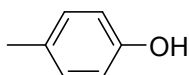

Faint yellow liquid (32.1 mg, 99% yield); EtOAc/PE = 1/10. <sup>1</sup>H NMR (400 MHz, DMSO-*d*<sub>6</sub>) δ 9.11 (s, 1H), 6.98 (d, *J* = 8.0 Hz, 2H), 6.67 (d, *J* = 8.4 Hz, 2H), 2.20 (s, 3H); <sup>13</sup>C NMR (125 MHz, DMSO-*d*<sub>6</sub>) δ 155.0, 129.6, 127.1, 115.0, 20.0.

### 4-Tert-Butylphenol (3b)<sup>[2]</sup>

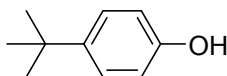

White solid (38.7 mg, 86% yield); EtOAc/PE = 1/10. <sup>1</sup>H NMR (400 MHz, DMSO-*d*<sub>6</sub>) δ 9.16 (s, 1H), 7.19 (d, *J* = 8.8 Hz, 2H), 6.71 (d, *J* = 8.8 Hz, 2H), 1.25 (s, 9H); <sup>13</sup>C NMR (125 MHz, DMSO-*d*<sub>6</sub>) δ 154.9, 140.8, 125.8, 114.6, 33.6, 31.4.

### 4-Fluorophenol (4b)<sup>[3]</sup>

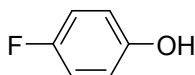

Yellow solid (31.9 mg, 95% yield); EtOAc/PE = 1/10. <sup>1</sup>H NMR (400 MHz, DMSO-*d*<sub>6</sub>) δ 9.37 (s, 1H), 7.03-6.98 (m, 2H), 6.79-6.75 (m, 2H); <sup>13</sup>C NMR (125 MHz, DMSO-*d*<sub>6</sub>) δ 155.5 (d, *J*<sub>C-F</sub> = 231.3 Hz), 153.6 (d, *J*<sub>C-F</sub> = 2.5 Hz), 116.0 (d, *J*<sub>C-F</sub> = 7.5 Hz), 115.5 (d, *J*<sub>C-F</sub> = 22.5 Hz); <sup>19</sup>F NMR (470 MHz, DMSO-*d*<sub>6</sub>) δ -126.4 (s, 1F).

### 4-Chlorophenol (5b)<sup>[1]</sup>

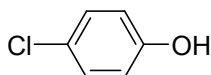

White solid (32.9 mg, 85% yield); EtOAc/PE = 1/10. <sup>1</sup>H NMR (400 MHz, DMSO-*d*<sub>6</sub>) δ 9.70 (s, 1H), 7.23-7.19 (m, 2H), 6.82-6.78 (m, 2H); <sup>13</sup>C NMR (125 MHz, DMSO-*d*<sub>6</sub>) δ 156.3, 129.1, 122.3, 116.9.



#### 4-Bromophenol (6b)<sup>[3]</sup>

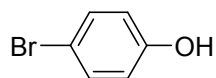

Yellow solid (26.8 mg, 52% yield); EtOAc/PE = 1/10. <sup>1</sup>H NMR (400 MHz, DMSO-*d*<sub>6</sub>) δ 9.71 (s, 1H), 7.35-7.31 (m, 2H), 6.77-6.73 (m, 2H); <sup>13</sup>C NMR (125 MHz, DMSO-*d*<sub>6</sub>) δ 156.7, 132.0, 117.5, 109.9.

#### 4-Iodophenol (7b)<sup>[3]</sup>

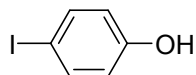

Off white solid (16.0 mg, 24% yield); EtOAc/PE = 1/10. <sup>1</sup>H NMR (400 MHz, DMSO-*d*<sub>6</sub>) δ 9.70 (s, 1H), 7.50-7.46 (m, 2H), 6.66-6.62 (m, 2H); <sup>13</sup>C NMR (125 MHz, DMSO-*d*<sub>6</sub>) δ 157.3, 137.8, 118.2, 80.6.

#### 4-Phenoxyphenol (8b)<sup>[4]</sup>

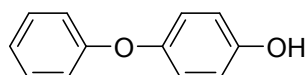

Faint yellow solid (40.6 mg, 73% yield); EtOAc/PE = 1/5. <sup>1</sup>H NMR (500 MHz, DMSO-*d*<sub>6</sub>) δ 9.35 (s, 1H), 7.33-7.31 (m, 2H), 7.05-7.02 (m, 1H), 6.88 (d, *J* = 7.5 Hz, 4H), 6.78 (d, *J* = 7.6 Hz, 2H); <sup>13</sup>C NMR (125 MHz, DMSO-*d*<sub>6</sub>) δ 158.4, 153.8, 147.8, 129.7, 122.2, 120.9, 116.9, 116.2.

#### 4-(Phenylmethoxy)-phenol (9b)<sup>[5]</sup>

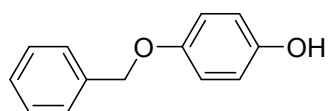

White solid (39.9 mg, 67% yield); EtOAc/PE = 1/5. <sup>1</sup>H NMR (400 MHz, DMSO-*d*<sub>6</sub>) δ 8.97 (s, 1H), 7.46-7.38 (m, 4H), 7.36-7.32 (m, 1H), 6.86-6.83 (m, 2H), 6.72-6.68 (m, 2H), 5.01 (s, 2H); <sup>13</sup>C NMR (125 MHz, DMSO-*d*<sub>6</sub>) δ 151.3, 151.2, 137.5, 128.3, 127.6, 127.5, 115.8, 115.7, 69.7.

#### 4-Methoxyphenol (10b)<sup>[1]</sup>

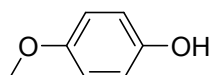

Clear colorless solid (26.5 mg, 71% yield); EtOAc/PE = 1/5. <sup>1</sup>H NMR (400 MHz, DMSO-*d*<sub>6</sub>) δ 8.93 (s, 1H), 6.79-6.75 (m, 2H), 6.72-6.68 (m, 2H), 3.68 (s, 3H); <sup>13</sup>C NMR (125 MHz, DMSO-*d*<sub>6</sub>) δ 152.1, 151.1, 115.7, 114.6, 55.3.

### Hydroquinone (11b)<sup>[1]</sup>

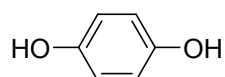

Off white solid (30.1 mg, 91% yield); EtOAc/PE = 1/5. <sup>1</sup>H NMR (400 MHz, DMSO-*d*<sub>6</sub>) δ 8.64 (s, 2H), 6.56 (s, 4H); <sup>13</sup>C NMR (125 MHz, DMSO-*d*<sub>6</sub>) δ 149.7, 115.6.

### 4-(Methylthio)phenol (12b)<sup>[3]</sup>

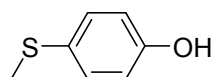

White solid (29.4 mg, 70% yield); EtOAc/PE = 1/5. <sup>1</sup>H NMR (400 MHz, DMSO-*d*<sub>6</sub>) δ 9.48 (s, 1H), 7.19-7.15 (m, 2H), 6.78-6.74 (m, 2H), 2.41 (s, 3H); <sup>13</sup>C NMR (125 MHz, DMSO-*d*<sub>6</sub>) δ 155.9, 129.8, 125.9, 116.1, 17.2.

### 4-(Trimethylsilyl)phenol (13b)<sup>[6]</sup>

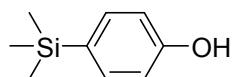

Off white solid (47.4 mg, 95% yield); EtOAc/PE = 1/5. <sup>1</sup>H NMR (400 MHz, DMSO-*d*<sub>6</sub>) δ 9.50 (s, 1H), 7.33 (d, *J* = 8.4 Hz, 2H), 6.79 (d, *J* = 8.4 Hz, 2H), 0.21 (s, 9H); <sup>13</sup>C NMR (125 MHz, DMSO-*d*<sub>6</sub>) δ 159.0, 135.3, 129.0, 115.8, 0.0.

### 4-(Trifluoromethyl)phenol (14b)<sup>[3]</sup>

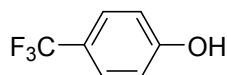

Yellow solid (40.8 mg, 84% yield); EtOAc/PE = 1/10. <sup>1</sup>H NMR (400 MHz, DMSO-*d*<sub>6</sub>) δ 10.30 (s, 1H), 7.55 (d, *J* = 8.4 Hz, 2H), 6.95 (d, *J* = 8.8 Hz, 2H); <sup>13</sup>C NMR (125 MHz, DMSO-*d*<sub>6</sub>) δ 160.7, 126.85 (q, *J*<sub>C-F</sub> = 3.8 Hz), 124.77 (q, *J*<sub>C-F</sub> = 268.8 Hz), 119.44 (q, *J*<sub>C-F</sub> = 31.3 Hz), 115.6; <sup>19</sup>F NMR (470 MHz, DMSO-*d*<sub>6</sub>) δ -59.6 (s, 3F).

### 4-Cyanophenol (15b)<sup>[1]</sup>

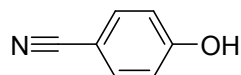

Off white solid (32.4 mg, 91% yield); EtOAc/PE = 1/5. <sup>1</sup>H NMR (400 MHz, DMSO-*d*<sub>6</sub>) δ 10.64 (s, 1H), 7.66 (d, *J* = 8.8 Hz, 2H), 6.93 (d, *J* = 8.8 Hz, 2H); <sup>13</sup>C NMR (125 MHz, DMSO-*d*<sub>6</sub>) δ 161.6, 134.2, 119.5, 116.4, 101.0.

### 4-Nitrophenol (16b)<sup>[3]</sup>

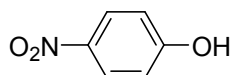

Faint yellow solid (37.9 mg, 91% yield); EtOAc/PE = 1/3.  $^1\text{H}$  NMR (400 MHz, DMSO- $d_6$ )  $\delta$  11.08 (s, 1H), 8.16-8.12 (m, 2H), 6.98-6.93 (m, 2H);  $^{13}\text{C}$  NMR (125 MHz, DMSO- $d_6$ )  $\delta$  163.9, 139.6, 126.1, 115.7.

#### 4-Hydroxybenzaldehyde (17b)<sup>[3]</sup>

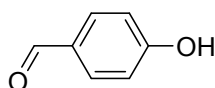

Faint yellow solid (34.4 mg, 94% yield); EtOAc/PE = 1/2.  $^1\text{H}$  NMR (500 MHz, DMSO- $d_6$ )  $\delta$  10.61 (s, 1H),  $\delta$  9.79 (s, 1H), 7.76 (d,  $J$  = 8.0 Hz, 2H), 6.94 (d,  $J$  = 8.0 Hz, 2H);  $^{13}\text{C}$  NMR (125 MHz, DMSO- $d_6$ )  $\delta$  190.8, 163.3, 132.0, 128.4, 115.8.

#### 4'-Hydroxyacetophenone (18b)<sup>[2]</sup>

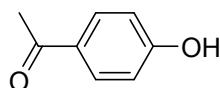

White solid (29.8 mg, 73% yield); EtOAc/PE = 1/3.  $^1\text{H}$  NMR (500 MHz, DMSO- $d_6$ )  $\delta$  10.34 (s, 1H), 7.83 (d,  $J$  = 7.5 Hz, 2H), 6.84 (d,  $J$  = 7.5 Hz, 2H), 2.47 (s, 3H);  $^{13}\text{C}$  NMR (125 MHz, DMSO- $d_6$ )  $\delta$  195.9, 162.0, 130.6, 128.6, 115.1, 26.2.

#### Methylparaben (19b)<sup>[3]</sup>

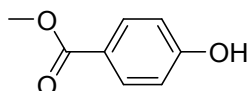

White solid (42.5 mg, 93% yield); EtOAc/PE = 1/5.  $^1\text{H}$  NMR (400 MHz, DMSO- $d_6$ )  $\delta$  10.35 (s, 1H), 7.82 (d,  $J$  = 8.0 Hz, 2H), 6.85 (d,  $J$  = 6.8 Hz, 2H), 3.78 (s, 3H);  $^{13}\text{C}$  NMR (125 MHz, DMSO- $d_6$ )  $\delta$  166.0, 161.9, 131.3, 120.3, 115.3, 52.5.

#### 4-Hydroxystyrene (20b)<sup>[3]</sup>

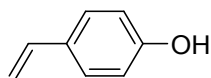

Clear colorless liquid (20.9 mg, 58% yield); EtOAc/PE = 1/5.  $^1\text{H}$  NMR (400 MHz, DMSO- $d_6$ )  $\delta$  9.56 (s, 1H), 7.32-7.29 (m, 2H), 6.79-6.75 (m, 2H), 6.63 (dd,  $J_1$  = 10.8 Hz,  $J_2$  = 17.6 Hz, 1H), 5.61 (dd,  $J_1$  = 1.2 Hz,  $J_2$  = 17.6 Hz, 1H), 5.06 (dd,  $J_1$  = 0.8 Hz,  $J_2$  = 10.8 Hz, 1H);  $^{13}\text{C}$  NMR (125 MHz, DMSO- $d_6$ )  $\delta$  157.3, 136.4, 128.3, 127.4, 115.3, 110.5.

### m-Cresol (21b)<sup>[1]</sup>

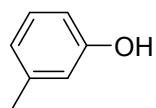

Brown liquid (30.0 mg, 93% yield); EtOAc/PE = 1/7. <sup>1</sup>H NMR (400 MHz, DMSO-*d*<sub>6</sub>) δ 9.26 (s, 1H), 7.07-7.04 (m, 1H), 6.61-6.57 (m, 2H), 6.60 (s, 1H), 2.24 (s, 3H); <sup>13</sup>C NMR (125 MHz, DMSO-*d*<sub>6</sub>) δ 157.2, 138.6, 129.1, 119.5, 115.8, 112.3, 21.0. **3-**

### Fluorophenol (22b)<sup>[7]</sup>

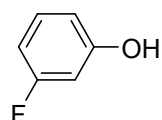

Brown liquid (23.6 mg, 70% yield); EtOAc/PE = 1/10. <sup>1</sup>H NMR (400 MHz, DMSO-*d*<sub>6</sub>) δ 9.88 (s, 1H), 7.23-7.18 (m, 1H), 6.64-6.55 (m, 3H); <sup>13</sup>C NMR (125 MHz, DMSO-*d*<sub>6</sub>) δ 163.0 (d, *J*<sub>C-F</sub> = 241.3 Hz), 159.0 (d, *J*<sub>C-F</sub> = 11.3 Hz), 130.5 (d, *J*<sub>C-F</sub> = 11.3 Hz), 111.52 (d, *J*<sub>C-F</sub> = 2.5 Hz), 105.4 (d, *J*<sub>C-F</sub> = 21.3 Hz), 102.4 (d, *J*<sub>C-F</sub> = 23.8 Hz); <sup>19</sup>F NMR (470 MHz, DMSO-*d*<sub>6</sub>) δ -112.5 (s, 1F).

### 3-Chlorophenol (23b)<sup>[7]</sup>

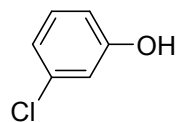

Faint yellow liquid (25.7 mg, 67% yield); EtOAc/PE = 1/5. <sup>1</sup>H NMR (400 MHz, DMSO-*d*<sub>6</sub>) δ 9.93 (s, 1H), 7.22-7.18 (m, 1H), 6.85-6.83 (m, 2H), 6.78-6.75 (m, 1H); <sup>13</sup>C NMR (125 MHz, DMSO-*d*<sub>6</sub>) δ 158.5, 133.4, 130.7, 118.7, 115.2, 114.2.

### 3-(Trifluoromethyl)phenol (24b)<sup>[7]</sup>

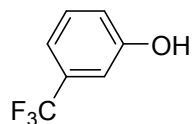

Yellow liquid (46.8 mg, 96% yield); EtOAc/PE = 1/10. <sup>1</sup>H NMR (400 MHz, DMSO-*d*<sub>6</sub>) δ 10.12 (s, 1H), 7.45-7.41 (m, 1H), 7.15 (s, 1H), 7.13-7.07 (m, 2H); <sup>13</sup>C NMR (125 MHz, DMSO-*d*<sub>6</sub>) δ 157.8, 130.6, 130.2 (q, *J*<sub>C-F</sub> = 31.3 Hz), 124.1 (q, *J*<sub>C-F</sub> = 270.0 Hz), 119.4, 115.3 (q, *J*<sub>C-F</sub> = 3.8 Hz), 111.5 (q, *J*<sub>C-F</sub> = 3.8 Hz); <sup>19</sup>F NMR (470 MHz, DMSO-*d*<sub>6</sub>) δ -61.3 (s, 3F).

### 3-Nitrophenol (25b)<sup>[1]</sup>

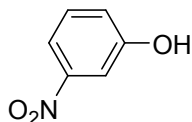

Faint yellow solid (38.9 mg, 93% yield); EtOAc/PE = 1/10.  $^1\text{H}$  NMR (500 MHz, DMSO- $d_6$ )  $\delta$  10.46 (s, 1H), 7.67 (d,  $J$  = 8.0 Hz, 1H), 7.57 (s, 1H), 7.49-7.46 (m, 1H), 7.23 (d,  $J$  = 8.5 Hz, 1H);  $^{13}\text{C}$  NMR (125 MHz, DMSO- $d_6$ )  $\delta$  158.2, 148.7, 130.5, 122.3, 113.7, 109.5.

### 3'-Hydroxyacetophenone (26b)<sup>[2]</sup>

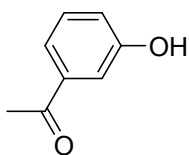

White solid (27.9 mg, 68% yield); EtOAc/PE = 1/3.  $^1\text{H}$  NMR (400 MHz, DMSO- $d_6$ )  $\delta$  9.26 (s, 1H), 7.42 (d,  $J$  = 7.6 Hz, 1H), 7.36-7.33 (m, 2H), 7.05 (d,  $J$  = 8.0 Hz, 1H), 2.55 (s, 3H);  $^{13}\text{C}$  NMR (125 MHz, DMSO- $d_6$ )  $\delta$  197.7, 157.5, 138.2, 129.7, 120.2, 119.2, 114.2, 26.7.

### 3-Methoxyphenol (27b)<sup>[8]</sup>

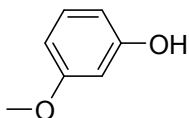

Light yellow liquid (36.8 mg, 99% yield); EtOAc/PE = 1/10.  $^1\text{H}$  NMR (400 MHz, DMSO- $d_6$ )  $\delta$  9.39 (s, 1H), 7.07-7.03 (m, 1H), 6.36-6.32 (m, 2H), 6.32 (s, 1H), 3.69 (s, 3H);  $^{13}\text{C}$  NMR (125 MHz, DMSO- $d_6$ )  $\delta$  160.5, 158.5, 129.8, 107.8, 104.6, 101.2, 54.8.

### Resorcinol (28b)<sup>[8]</sup>

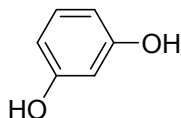

Faint yellow solid (32.3 mg, 98% yield); EtOAc/PE = 1/5.  $^1\text{H}$  NMR (400 MHz, DMSO- $d_6$ )  $\delta$  9.17 (s, 2H), 6.96-6.92 (m, 1H), 6.24-6.20 (m, 2H), 6.21 (s, 1H);  $^{13}\text{C}$  NMR (125 MHz, DMSO- $d_6$ )  $\delta$  158.4, 129.7, 106.2, 102.5.

### o-Cresol (29b)<sup>[1]</sup>

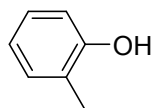

White solid (20.3 mg, 63% yield); EtOAc/PE = 1/10.  $^1\text{H}$  NMR (400 MHz,  $\text{DMSO-}d_6$ )  $\delta$  9.26 (s, 1H), 7.06 (d,  $J = 7.4$  Hz, 1H), 7.02-6.98 (m, 1H), 6.79 (d,  $J = 8.0$  Hz, 1H), 6.72-6.68 (m, 1H), 2.14 (s, 3H);  $^{13}\text{C}$  NMR (125 MHz,  $\text{DMSO-}d_6$ )  $\delta$  155.6, 130.7, 126.8, 123.9, 118.9, 114.8, 16.1.

**Guaiacol (30b)**<sup>[1]</sup>

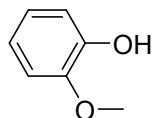

Light yellow liquid (25.5 mg, 69% yield); EtOAc/PE = 1/10.  $^1\text{H}$  NMR (400 MHz,  $\text{DMSO-}d_6$ )  $\delta$  8.93 (s, 1H), 6.95-6.91 (m, 1H), 6.81-6.73 (m, 3H), 3.77 (s, 3H);  $^{13}\text{C}$  NMR (125 MHz,  $\text{DMSO-}d_6$ )  $\delta$  147.9, 146.9, 121.2, 119.4, 115.9, 112.7, 55.8.

**Methyl salicylate (31b)**<sup>[9]</sup>

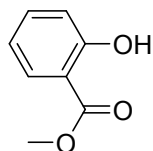

Clear colorless liquid (29.6 mg, 65% yield); EtOAc/PE = 1/15.  $^1\text{H}$  NMR (400 MHz,  $\text{DMSO-}d_6$ )  $\delta$  10.55 (s, 1H), 7.82-7.80 (m, 1H), 7.57-7.53 (m, 1H), 7.03-7.00 (m, 1H), 6.99-6.95 (m, 1H), 3.92 (s, 3H);  $^{13}\text{C}$  NMR (125 MHz,  $\text{DMSO-}d_6$ )  $\delta$  169.2, 160.0, 135.6, 129.9, 119.4, 117.4, 113.0, 42.4.

**2-Phenylphenol (32b)**<sup>[3]</sup>

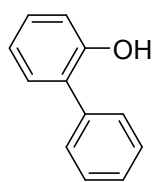

White solid (44.0 mg, 86% yield); EtOAc/PE = 1/15.  $^1\text{H}$  NMR (400 MHz,  $\text{DMSO-}d_6$ )  $\delta$  9.56 (s, 1H), 7.56 (d,  $J = 8.0$  Hz, 2H), 7.43-7.40 (m, 2H), 7.33-7.36 (m, 2H), 7.21-7.16 (m, 1H), 6.97 (d,  $J = 8.0$  Hz, 1H), 6.92-6.88 (m, 1H);  $^{13}\text{C}$  NMR (125 MHz,  $\text{DMSO-}d_6$ )  $\delta$  154.2, 138.6, 130.3, 129.0, 128.4, 127.9, 127.7, 126.4, 119.4, 116.0.

**2-Hydroxystyrene (33b)**<sup>[10]</sup>

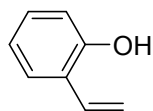

Clear colorless liquid (8.1 mg, 23% yield); EtOAc/PE = 1/15.  $^1\text{H}$  NMR (400 MHz, DMSO- $d_6$ )  $\delta$  9.65 (s, 1H), 7.46-7.44 (m, 1H), 7.13-7.09 (m, 1H), 6.96 (dd,  $J_1 = 11.2$  Hz,  $J_2 = 17.6$  Hz, 1H), 6.87-6.84 (m, 1H), 6.82-6.78 (m, 1H), 5.78 (dd,  $J_1 = 1.6$  Hz,  $J_2 = 18.0$  Hz, 1H), 5.21 (dd,  $J_1 = 1.6$  Hz,  $J_2 = 11.2$  Hz, 1H);  $^{13}\text{C}$  NMR (125 MHz, DMSO- $d_6$ )  $\delta$  154.7, 131.8, 128.7, 126.2, 123.9, 119.1, 115.7, 113.5.

### 3,5-Dimethylphenol (34b)<sup>[3]</sup>

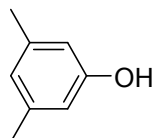

White solid (19.5 mg, 53% yield); EtOAc/PE = 1/10.  $^1\text{H}$  NMR (400 MHz, DMSO- $d_6$ )  $\delta$  9.14 (s, 1H), 6.42 (s, 1H), 6.39 (s, 2H), 2.19 (s, 6H);  $^{13}\text{C}$  NMR (125 MHz, DMSO- $d_6$ )  $\delta$  157.5, 138.6, 120.8, 113.3, 21.3.

### 2,5-Dimethylphenol (35b)<sup>[9]</sup>

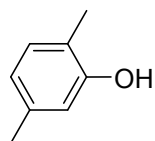

White solid (26.7 mg, 73% yield); EtOAc/PE = 1/10.  $^1\text{H}$  NMR (400 MHz, DMSO- $d_6$ )  $\delta$  9.13 (s, 1H), 6.93 (d,  $J = 7.6$  Hz, 1H), 6.61 (s, 1H), 6.51 (d,  $J = 7.6$  Hz, 1H), 2.20 (s, 3H), 2.09 (s, 3H);  $^{13}\text{C}$  NMR (125 MHz, DMSO- $d_6$ )  $\delta$  155.1, 135.6, 130.2, 120.5, 119.4, 115.3, 20.7, 15.5.

### 2,6-Dimethylphenol (36b)<sup>[1]</sup>

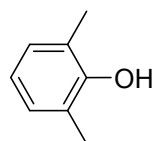

Faint yellow solid (20.3 mg, 55% yield); EtOAc/PE = 1/15.  $^1\text{H}$  NMR (400 MHz, DMSO- $d_6$ )  $\delta$  8.19 (s, 1H), 6.91 (d,  $J = 7.2$  Hz, 2H), 6.67-6.63 (m, 1H), 2.17 (s, 6H);  $^{13}\text{C}$  NMR (125 MHz, DMSO- $d_6$ )  $\delta$  153.1, 128.1, 124.1, 119.1, 16.5.

### 2,4,6-Trimethylphenol (37b)<sup>[8]</sup>

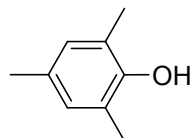

White solid (31.8 mg, 78% yield); EtOAc/PE = 1/10.  $^1\text{H}$  NMR (400 MHz, DMSO- $d_6$ )  $\delta$  7.93 (s, 1H), 6.72 (s, 2H), 2.15 (s, 3H), 2.14 (s, 6H);  $^{13}\text{C}$  NMR (125 MHz, DMSO- $d_6$ )  $\delta$  150.7, 128.6, 127.3, 124.0, 20.0, 16.4.

### 2,6-Dimethoxyphenol (38b)<sup>[3]</sup>

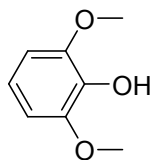

Off white solid (35.2 mg, 76% yield); EtOAc/PE = 1/5.  $^1\text{H}$  NMR (400 MHz, DMSO- $d_6$ )  $\delta$  8.28 (s, 1H), 6.74-6.70 (m, 1H), 6.63-6.61 (m, 2H), 3.77 (s, 6H);  $^{13}\text{C}$  NMR (125 MHz, DMSO- $d_6$ )  $\delta$  148.2, 135.7, 118.1, 105.8, 56.0.

### 3,4-Dimethoxyphenol (39b)<sup>[7]</sup>

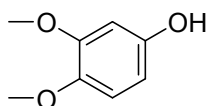

Faint yellow solid (36.9 mg, 80% yield); EtOAc/PE = 1/5.  $^1\text{H}$  NMR (400 MHz, DMSO- $d_6$ )  $\delta$  8.97 (s, 1H), 6.76 (d,  $J$  = 8.4 Hz, 1H), 6.43 (d,  $J$  = 2.8 Hz, 1H), 6.29-6.26 (m, 1H), 3.72 (s, 3H), 3.67 (s, 3H);  $^{13}\text{C}$  NMR (125 MHz, DMSO- $d_6$ )  $\delta$  151.9, 149.8, 141.8, 113.8, 105.6, 100.9, 56.4, 55.3.

### Benzo[d][1,3]dioxol-5-ol (40b)<sup>[6]</sup>

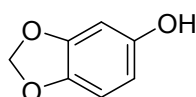

White solid (36.5 mg, 88% yield); EtOAc/PE = 1/5.  $^1\text{H}$  NMR (400 MHz, DMSO- $d_6$ )  $\delta$  9.15 (s, 1H), 6.72 (d,  $J$  = 8.4 Hz, 1H), 6.40 (d,  $J$  = 2.4 Hz, 1H), 6.23-6.20 (m, 1H), 5.92 (s, 2H);  $^{13}\text{C}$  NMR (125 MHz, DMSO- $d_6$ )  $\delta$  152.5, 147.6, 139.6, 108.1, 106.2, 100.5, 97.8.

### Naphthalen-1-ol (43b)<sup>[1]</sup>

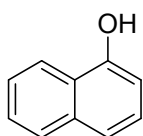

Off white solid (35.5 mg, 82% yield); EtOAc/PE = 1/10.  $^1\text{H}$  NMR (500 MHz, DMSO- $d_6$ )  $\delta$  10.32 (s, 1H), 8.34 (d,  $J$  = 7.0 Hz, 1H), 8.01 (d,  $J$  = 6.5 Hz, 1H), 7.67-7.46 (m,



4H), 7.08 (d,  $J = 5.0$  Hz, 1H);  $^{13}\text{C}$  NMR (125 MHz,  $\text{DMSO-}d_6$ )  $\delta$  153.1, 134.4, 127.3, 126.4, 126.0, 124.6, 124.5, 121.9, 118.3, 108.0.

#### Naphthalen-2-ol (44b)<sup>[1]</sup>

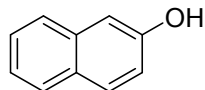

White solid (34.2 mg, 79% yield); EtOAc/PE = 1/10.  $^1\text{H}$  NMR (500 MHz,  $\text{DMSO-}d_6$ )  $\delta$  9.74 (s, 1H), 7.77-7.74 (m, 2H), 7.67 (d,  $J = 8.0$  Hz, 1H), 7.39-7.37 (m, 1H), 7.27-7.24 (m, 1H), 7.12 (s, 1H), 7.10-7.08 (m, 1H);  $^{13}\text{C}$  NMR (125 MHz,  $\text{DMSO-}d_6$ )  $\delta$  155.3, 134.6, 129.2, 127.7, 127.5, 126.1, 125.9, 122.6, 118.6, 108.6.

#### Anthracen-2-ol (45b)<sup>[6]</sup>

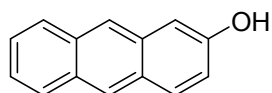

Yellow solid (29.2 mg, 50% yield); EtOAc/PE = 1/5.  $^1\text{H}$  NMR (500 MHz,  $\text{DMSO-}d_6$ )  $\delta$  9.94 (s, 1H), 8.42 (s, 1H), 8.27 (s, 1H), 7.97-7.96 (m, 3H), 7.43-7.38 (m, 2H), 7.24 (s, 1H), 7.17 (d,  $J = 8.0$  Hz, 1H);  $^{13}\text{C}$  NMR (125 MHz,  $\text{DMSO-}d_6$ )  $\delta$  154.8, 132.9, 131.7, 129.8, 129.3, 128.1, 127.3, 126.0, 125.4, 124.0, 122.8, 120.6, 106.5. 1-

#### Hydroxypyrene (46b)<sup>[1]</sup>

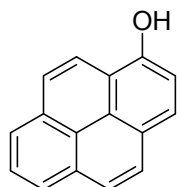

Yellow solid (46.2 mg, 71 % yield); EtOAc/PE = 1/5.  $^1\text{H}$  NMR (400 MHz,  $\text{DMSO-}d_6$ )  $\delta$  10.72 (s, 1H), 8.38 (d,  $J = 8.8$  Hz, 1H), 8.15-8.13 (m, 3H), 8.08-7.97 (m, 3H), 7.92 (d,  $J = 8.8$  Hz, 1H), 7.64 (d,  $J = 8.4$  Hz, 1H);  $^{13}\text{C}$  NMR (125 MHz,  $\text{DMSO-}d_6$ )  $\delta$  152.2, 131.4, 131.3, 127.4, 126.1, 126.1, 125.5, 125.4, 124.5, 123.9, 123.8, 123.6, 123.6, 121.4, 118.1, 113.2.

#### 1-Thianthrenol (47b)<sup>[11]</sup>

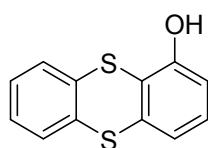

Yellow solid (51.1 mg, 73 % yield); EtOAc/PE = 1/5.  $^1\text{H}$  NMR (400 MHz,  $\text{DMSO-}d_6$ )  $\delta$  10.48 (s, 1H), 7.60-7.53 (m, 2H), 7.36-7.31 (m, 2H), 7.18-7.14 (m, 1H), 7.01 (d,  $J$  = 7.6 Hz, 1H), 6.89 (d,  $J$  = 8.0 Hz, 1H);  $^{13}\text{C}$  NMR (125 MHz,  $\text{DMSO-}d_6$ )  $\delta$  155.0, 134.7, 134.6, 128.7, 128.4, 128.0, 127.9, 120.9, 119.4, 114.2.

**9-Phenyl-9H-carbazol-2-ol (48b)**<sup>[12]</sup>

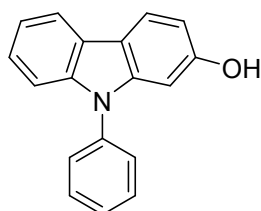

Faint yellow solid (66.1 mg, 85% yield); EtOAc/PE = 1/5.  $^1\text{H}$  NMR (400 MHz,  $\text{DMSO-}d_6$ )  $\delta$  9.57 (s, 1H), 8.09 (d,  $J$  = 7.6 Hz, 1H), 8.02 (d,  $J$  = 8.4 Hz, 1H), 7.73-7.69 (m, 2H), 7.63-7.61 (m, 2H), 7.57-7.53 (m, 1H), 7.34-7.28 (m, 2H), 7.25-7.21 (m, 1H), 6.80-6.76 (m, 2H);  $^{13}\text{C}$  NMR (125 MHz,  $\text{DMSO-}d_6$ )  $\delta$  157.0, 141.9, 140.1, 137.0, 130.1, 127.5, 126.6, 124.3, 123.3, 121.3, 119.9, 119.2, 115.2, 109.6, 109.1, 95.3.

**N-(4-hydroxyphenyl)carbazole (49b)**<sup>[13]</sup>

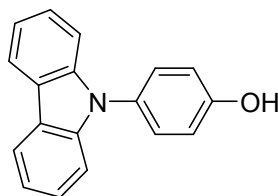

Faint yellow liquid (54.8 mg, 71% yield); EtOAc/PE = 1/5.  $^1\text{H}$  NMR (400 MHz,  $\text{DMSO-}d_6$ )  $\delta$  9.89 (s, 1H), 8.24 (d,  $J$  = 7.6 Hz, 2H), 6.45-7.38 (m, 4H), 7.31-7.26 (m, 4H), 7.07 (d,  $J$  = 8.4 Hz, 2H);  $^{13}\text{C}$  NMR (125 MHz,  $\text{DMSO-}d_6$ )  $\delta$  156.9, 140.7, 128.2, 127.8, 126.0, 122.3, 120.3, 119.5, 116.6, 109.5.

**9,9-Dimethyl-9H-fluoren-2-ol (50b)**<sup>[14]</sup>

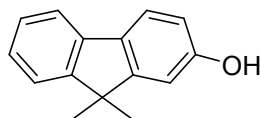

Yellow solid (53.4 mg, 85% yield); EtOAc/PE = 1/5.  $^1\text{H}$  NMR (400 MHz,  $\text{DMSO-}d_6$ )  $\delta$  9.52 (s, 1H), 7.66 (d,  $J$  = 7.2 Hz, 1H), 7.62 (d,  $J$  = 8.0 Hz, 1H), 7.48 (d,  $J$  = 7.2 Hz, 1H), 7.31-7.27 (m, 1H), 7.23-7.19 (m, 1H), 6.93 (d,  $J$  = 2.0 Hz, 1H), 6.77 (dd,  $J_1$  =

2.4 Hz,  $J_2 = 8.4$  Hz, 1H ), 1.41 (s, 6H);  $^{13}\text{C}$  NMR (125 MHz,  $\text{DMSO-}d_6$ )  $\delta$  157.5, 155.2, 152.6, 139.0, 129.7, 126.8, 125.6, 122.4, 120.9, 118.7, 114.1, 109.8, 46.1, 27.0.

#### 1-Octanol (51b)<sup>[15]</sup>

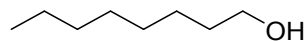

Clear colorless liquid (27.7 mg, 71% yield); EtOAc/PE = 1/10.  $^1\text{H}$  NMR (400 MHz,  $\text{CDCl}_3$ )  $\delta$  3.65-3.61 (m, 2H), 1.83 (s, 1H), 1.60-1.53 (m, 2H), 1.40-1.27 (m, 10H), 0.88 (t,  $J = 6.8$  Hz, 3H);  $^{13}\text{C}$  NMR (125 MHz,  $\text{CDCl}_3$ )  $\delta$  63.1, 32.8, 31.9, 29.4, 29.3, 25.8, 22.7, 14.1.

#### Decan-1-ol (52b)<sup>[12]</sup>

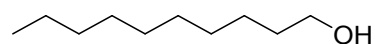

Clear colorless liquid (47.7 mg, 99% yield); EtOAc/PE = 1/10.  $^1\text{H}$  NMR (400 MHz,  $\text{CDCl}_3$ )  $\delta$  3.63 (t,  $J = 6.8$  Hz, 2H), 2.04 (s, 1H), 1.60-1.53 (m, 2H), 1.36-1.28 (m, 14H), 0.88 (t,  $J = 6.8$  Hz, 3H);  $^{13}\text{C}$  NMR (125 MHz,  $\text{CDCl}_3$ )  $\delta$  63.1, 32.9, 32.0, 19.7, 29.6, 29.5, 29.4, 25.8, 22.7, 14.1.

#### Reference:

- [1] Y.-Q. Zou, J.-R. Chen, X.-P. Liu, L.-Q. Lu, R. L. Davis, K. A. Jørgensen and W.-J. Xiao, *Angew. Chem. Int. Ed.*, 2012, **51**, 784.
- [2] J. Gatenyo, I. Vints and S. Rozen, *Chem. Commun.*, 2013, **49**, 7379-7381.
- [3] C. Zhu, R. Wang and J. R. Falck, *Org. Lett.*, 2012, **14**, 3494.
- [4] E. Dubost, V. Babin, F. Benoist and T. Cailly. *Org. Lett.*, 2018, **20**, 6302-6305.
- [5] Santos, C. C. Wagner, *Adv. Synth. Catal.*, 2018, **360**, 1376-1383.
- [6] I. Kumar, R. Sharma and U. Sharma, *Adv. Synth. Catal.*, 2018, **360**, 2013-2019.
- [7] J. Morin, Y. Zhao and V. Snieckus, *Org. Lett.*, 2013, **15**, 4102.
- [8] X. Zhang, G. Wu, W.-X. Gao and H.-Y. Wu, *Org. Lett.*, 2018, **203**, 708-711.
- [9] K. Renate; V. *Adv. Synth. Catal.*, 2018, **48**, 2809-2814.
- [10] M. V. Parfenov, L. V. Pirutko, I. E. Soshnikov and G. I. Panow, *Catalysis Communications.*, 2016, **86**, 59-62.
- [11] H. W. Gschwend, and H. R. Rodriguez, *Organic Reactions (Hoboken, NJ, United States)*, 26, No pp. given; 1979

- [12] D.-P. Luo, Y.-F. Huang, X.-Y. Hong, D. Chen, G.-X. Li, X.-B. Huang, W.-X. Gao, M.-C. Liu, Y.-B. Zhou and H.-Y. Wu, *Adv. Synth. Catal.*, 2019, **361**, 961.
- [13] H.-C. Yu, C. Liu, X.-M. Dai, J. Wang and J.-S. Qiu, *Tetrahedron*, 2017, **73**, 3031-3035.
- [14] L. T. Ball, L. J. Guy C and C. A. Russell, *J. Am. Chem. Soc.*, 2014, **136**, 254-264.
- [15] S. R. Tamang, D. Bedi, S. Shafiei-Haghighi, C. R. Smith, C. Crawford and M. Findlater, *Org. Lett.*, 2018, **20**, 6695-6700.

## 6. NMR spectra

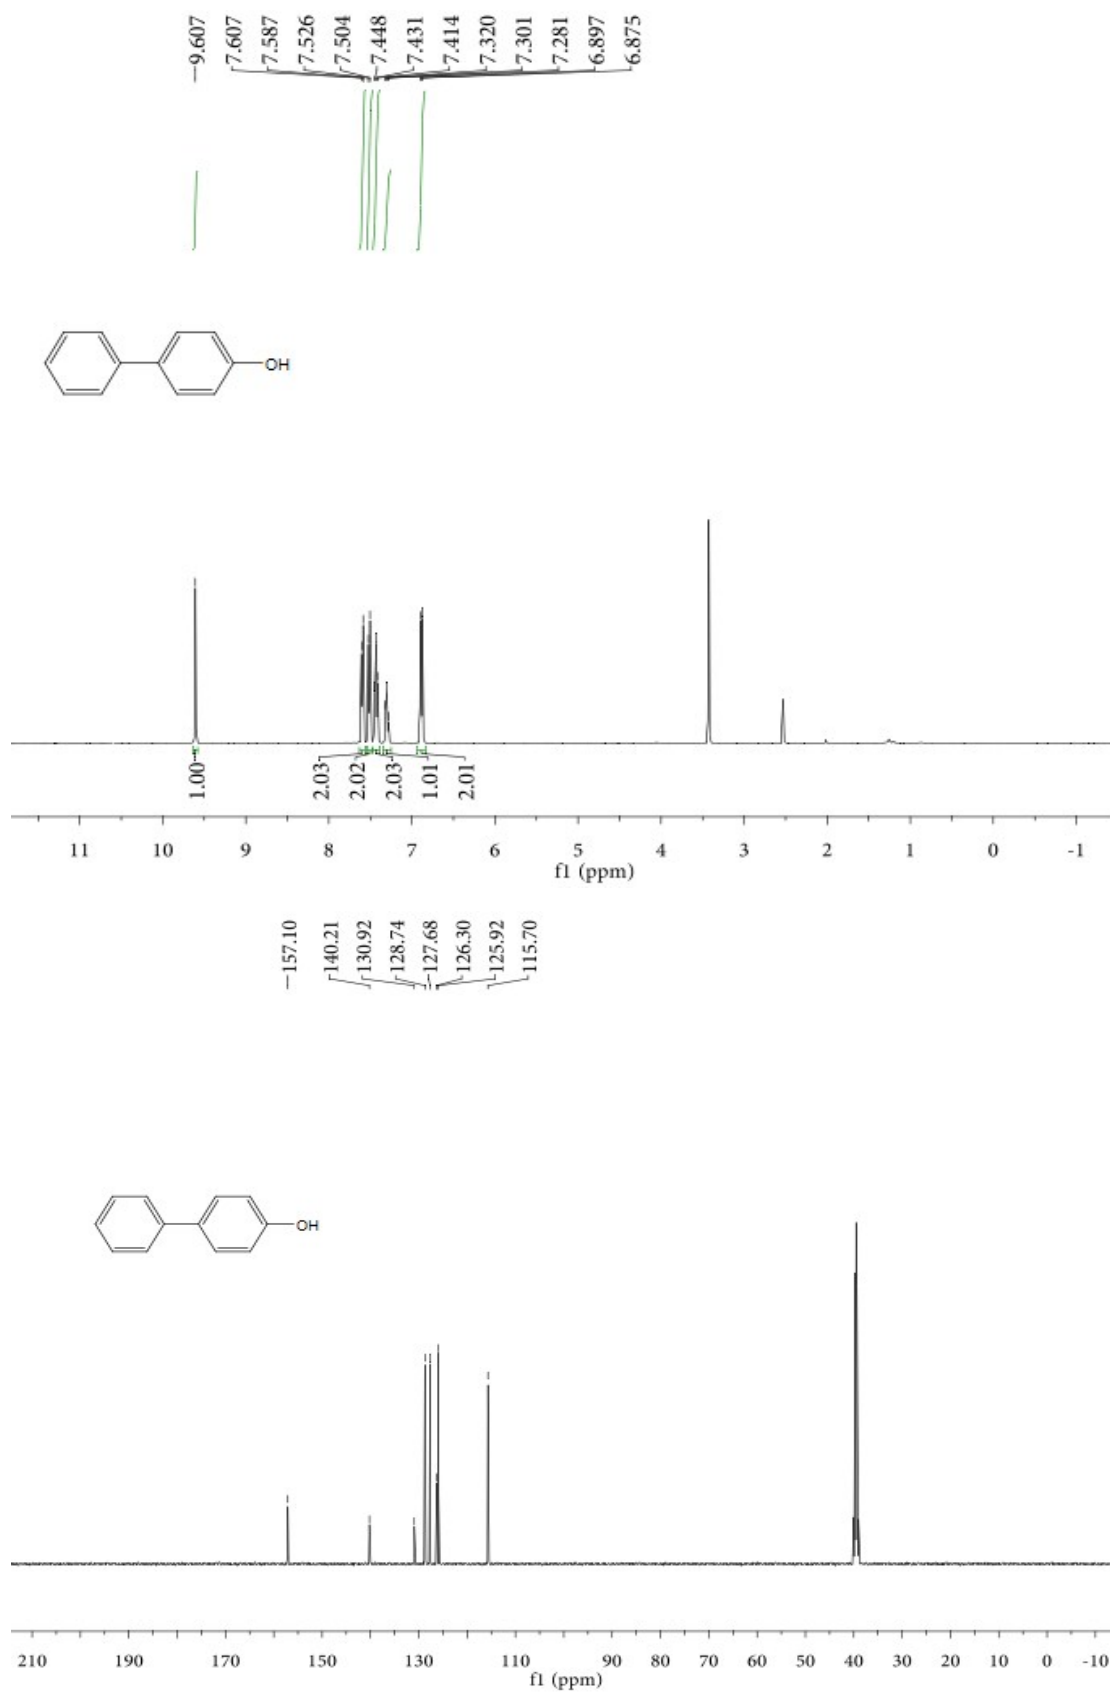

**Figure S3.** <sup>1</sup>H NMR of **1b** (400 MHz, DMSO-*d*<sub>6</sub>) and <sup>13</sup>C NMR of **1b** (125 MHz, DMSO-*d*<sub>6</sub>)

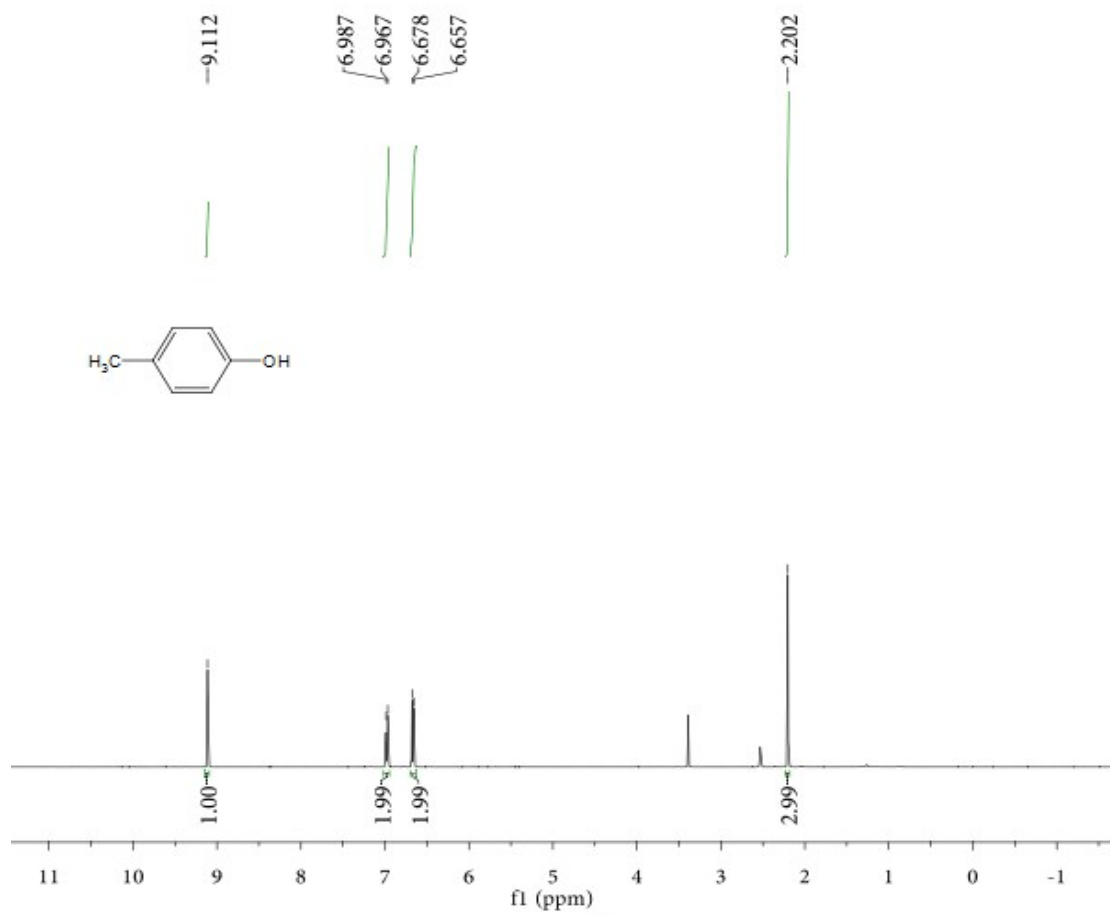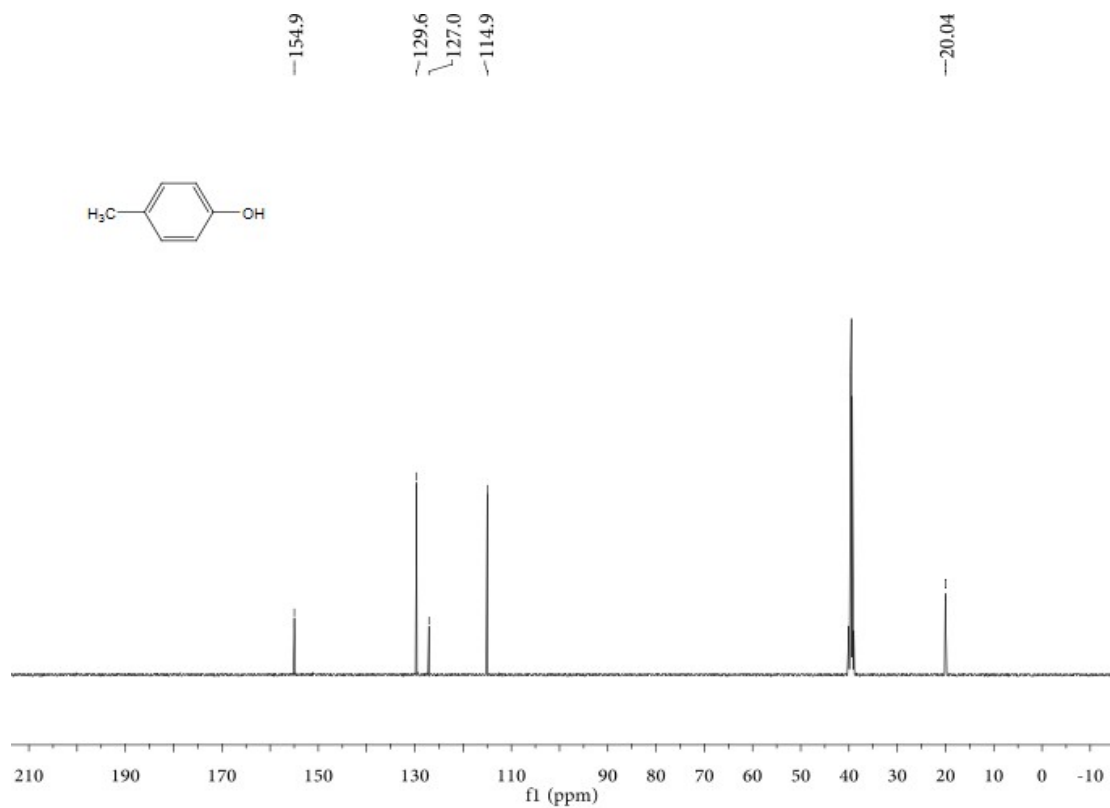

**Figure S4.** <sup>1</sup>H NMR of **2b** (400 MHz, DMSO-*d*<sub>6</sub>) and <sup>13</sup>C NMR of **2b** (125 MHz, DMSO-*d*<sub>6</sub>)

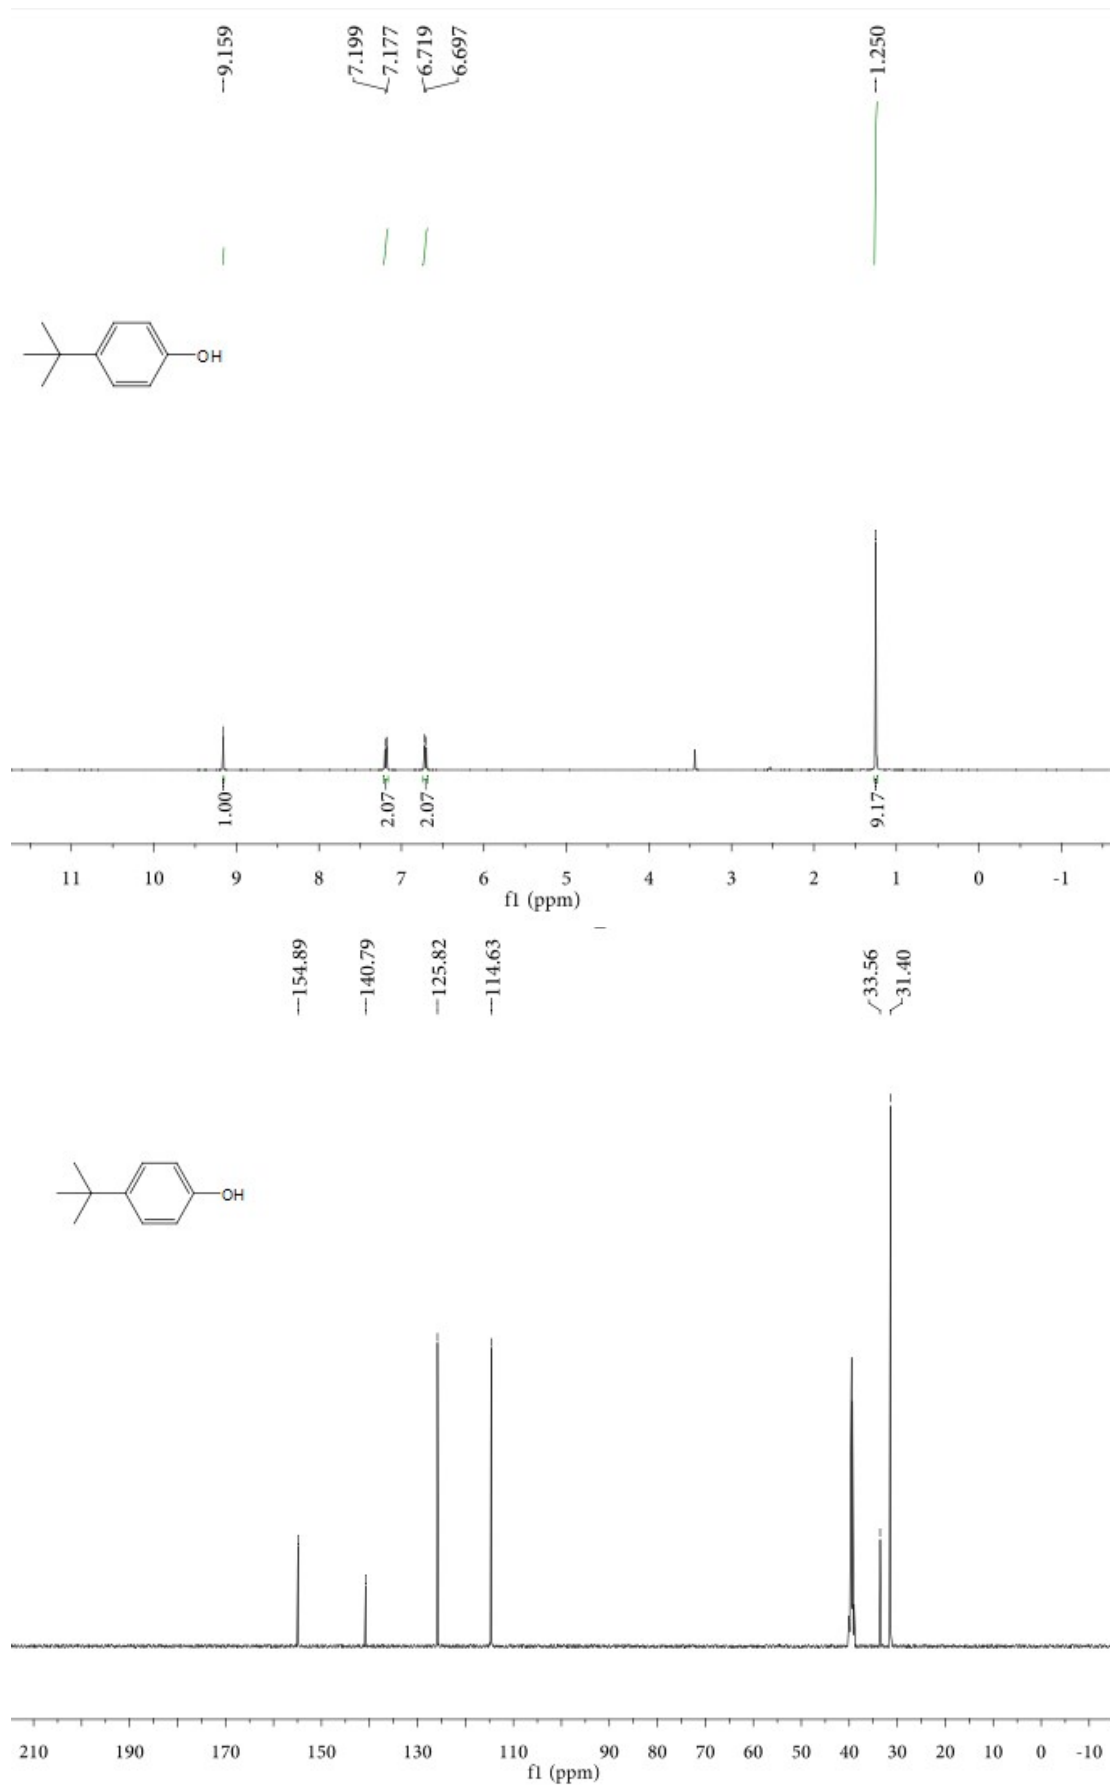

**Figure S5.** <sup>1</sup>H NMR of **3b** (400 MHz, DMSO-*d*<sub>6</sub>) and <sup>13</sup>C NMR of **3b** (125 MHz, DMSO-*d*<sub>6</sub>)

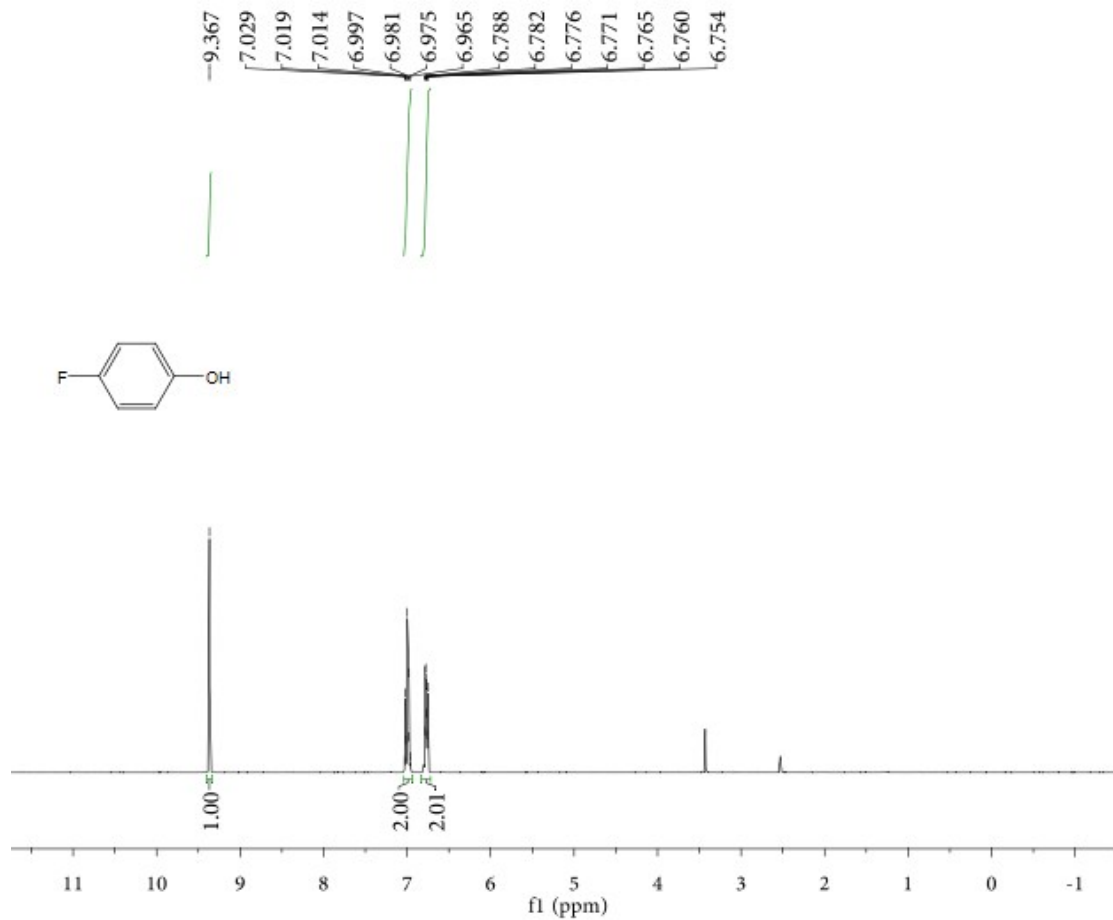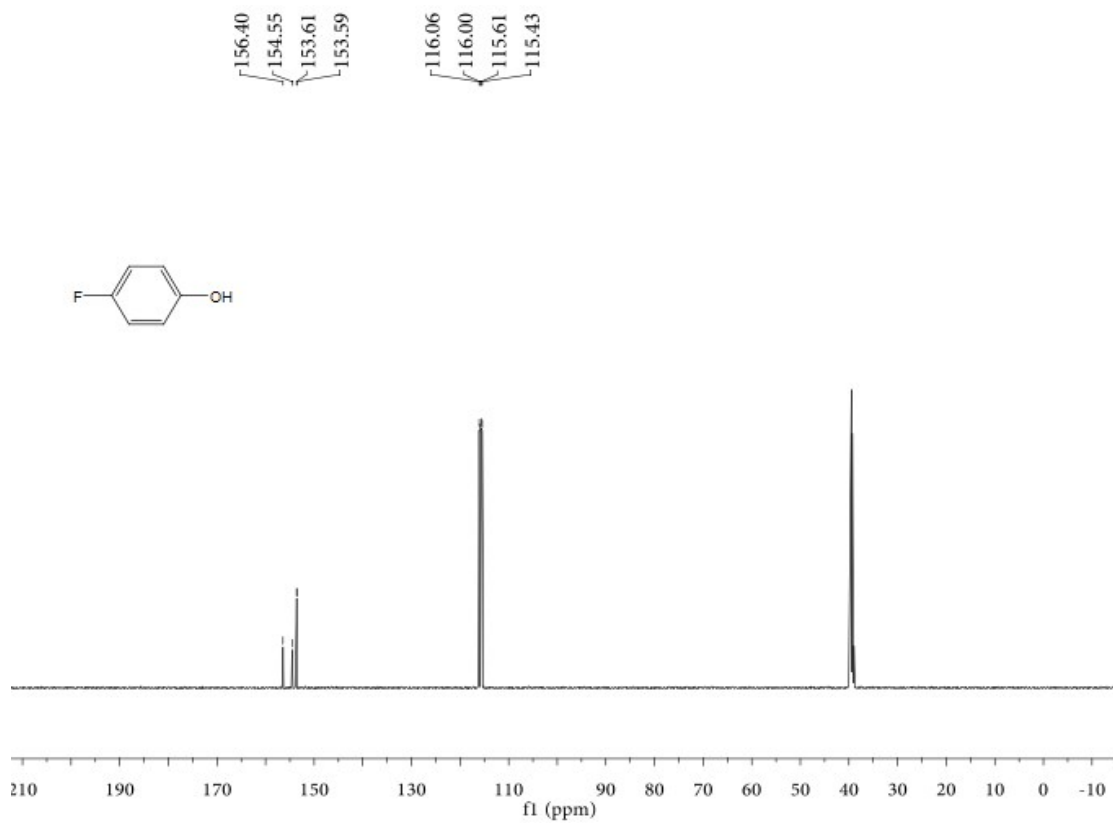



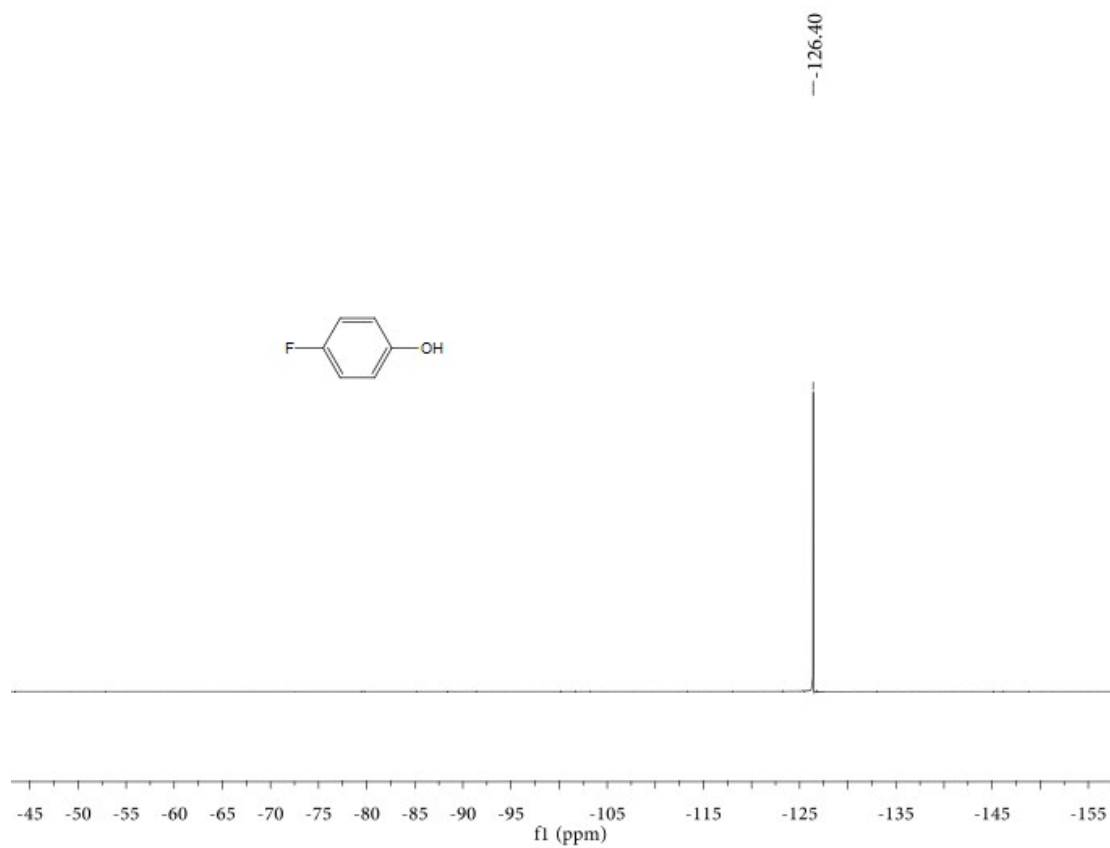

**Figure S6.** <sup>1</sup>H NMR of **4b** (400 MHz, DMSO-*d*<sub>6</sub>) and <sup>13</sup>C NMR of **4b** (125 MHz, DMSO-*d*<sub>6</sub>) and <sup>19</sup>F NMR of **4b** (470 MHz, DMSO-*d*<sub>6</sub>)

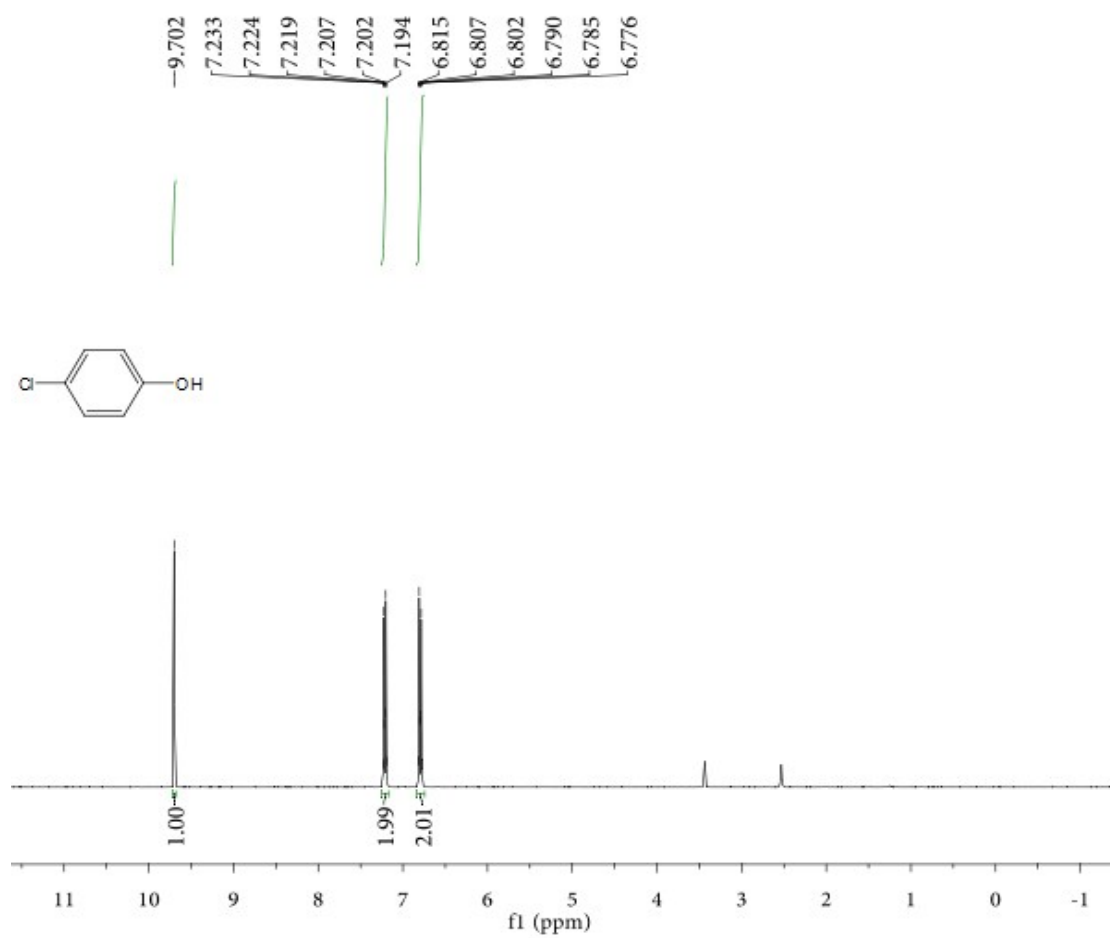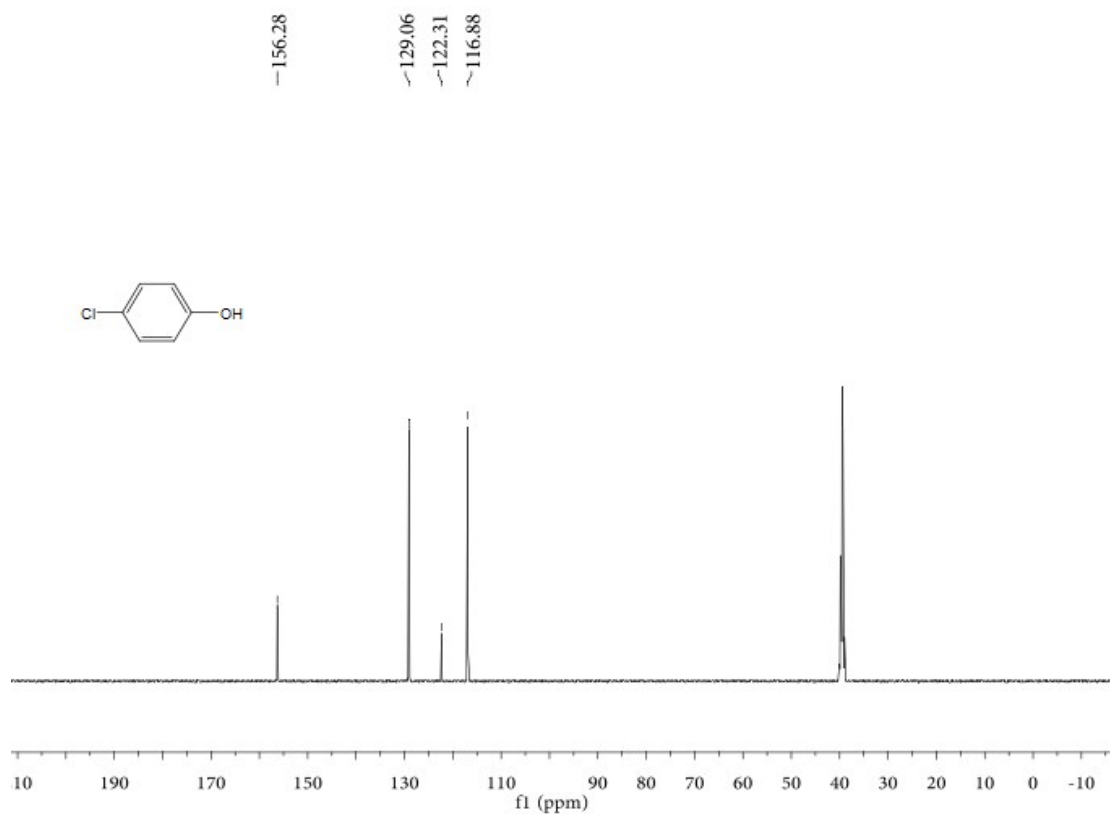

**Figure S7.** <sup>1</sup>H NMR of **5b** (400 MHz, DMSO-*d*<sub>6</sub>) and <sup>13</sup>C NMR of **5b** (125 MHz, DMSO-*d*<sub>6</sub>)

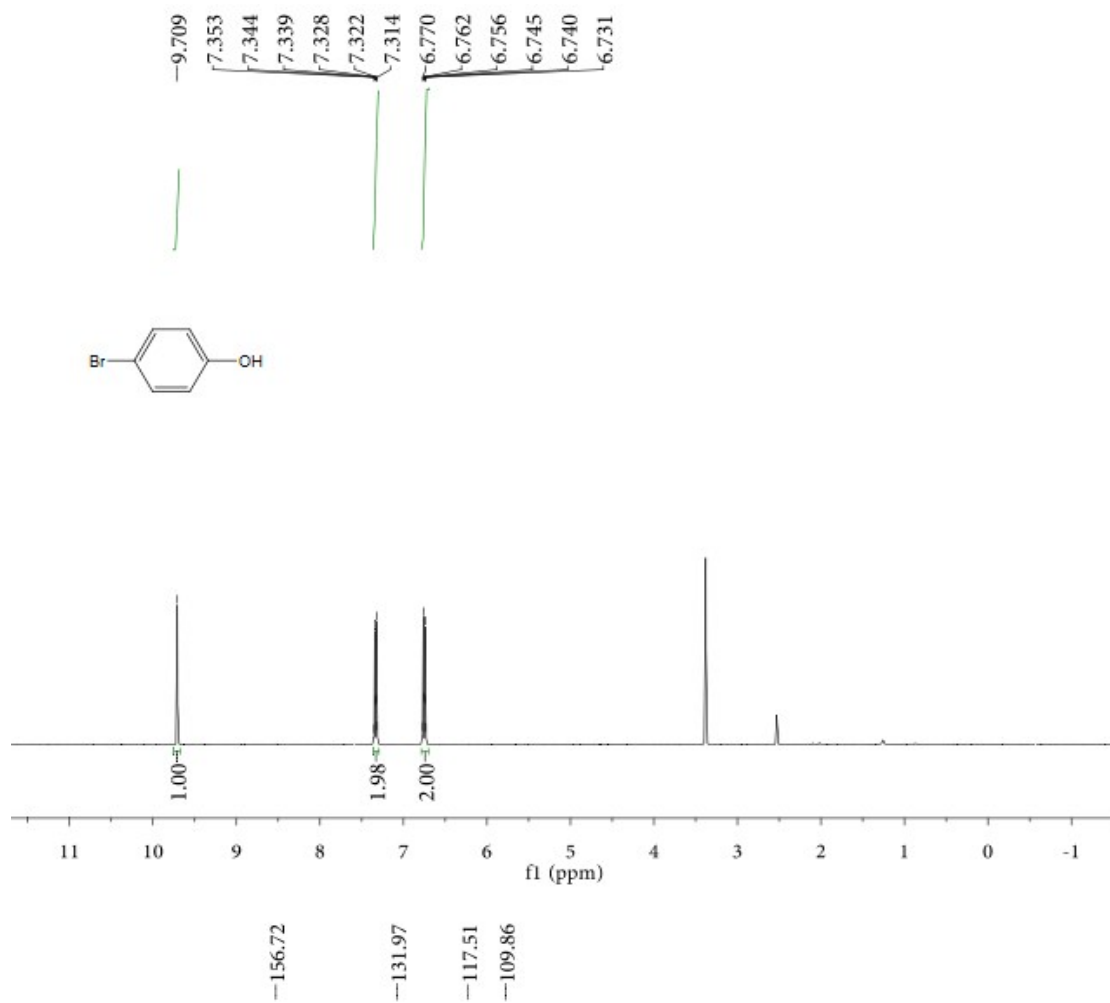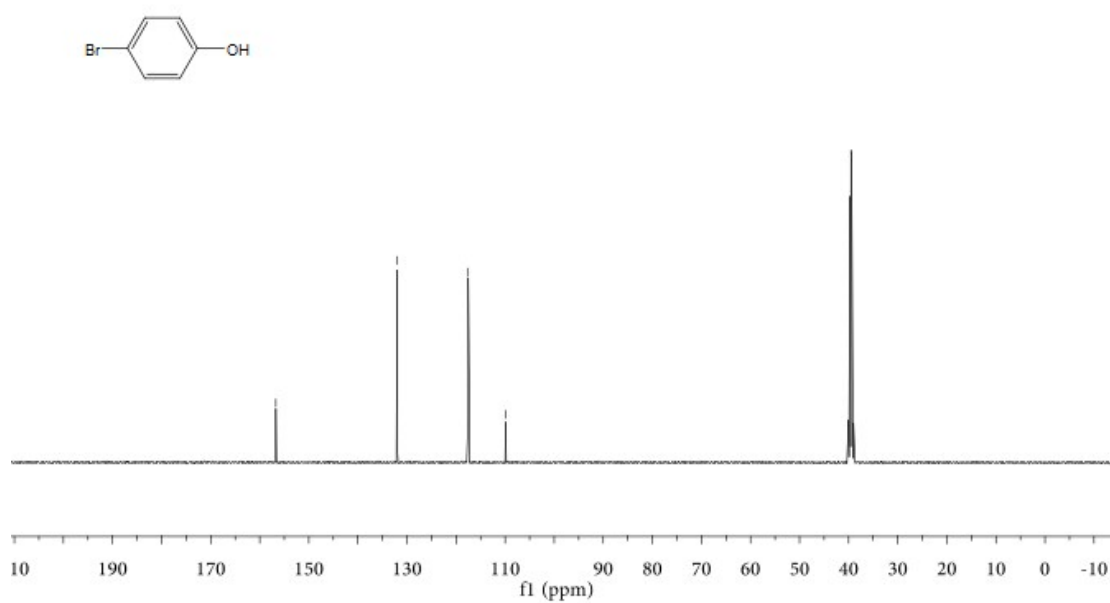

**Figure S8.**  $^1\text{H}$  NMR of **6b** (400 MHz,  $\text{DMSO-}d_6$ ) and  $^{13}\text{C}$  NMR of **6b** (125 MHz,  $\text{DMSO-}d_6$ )

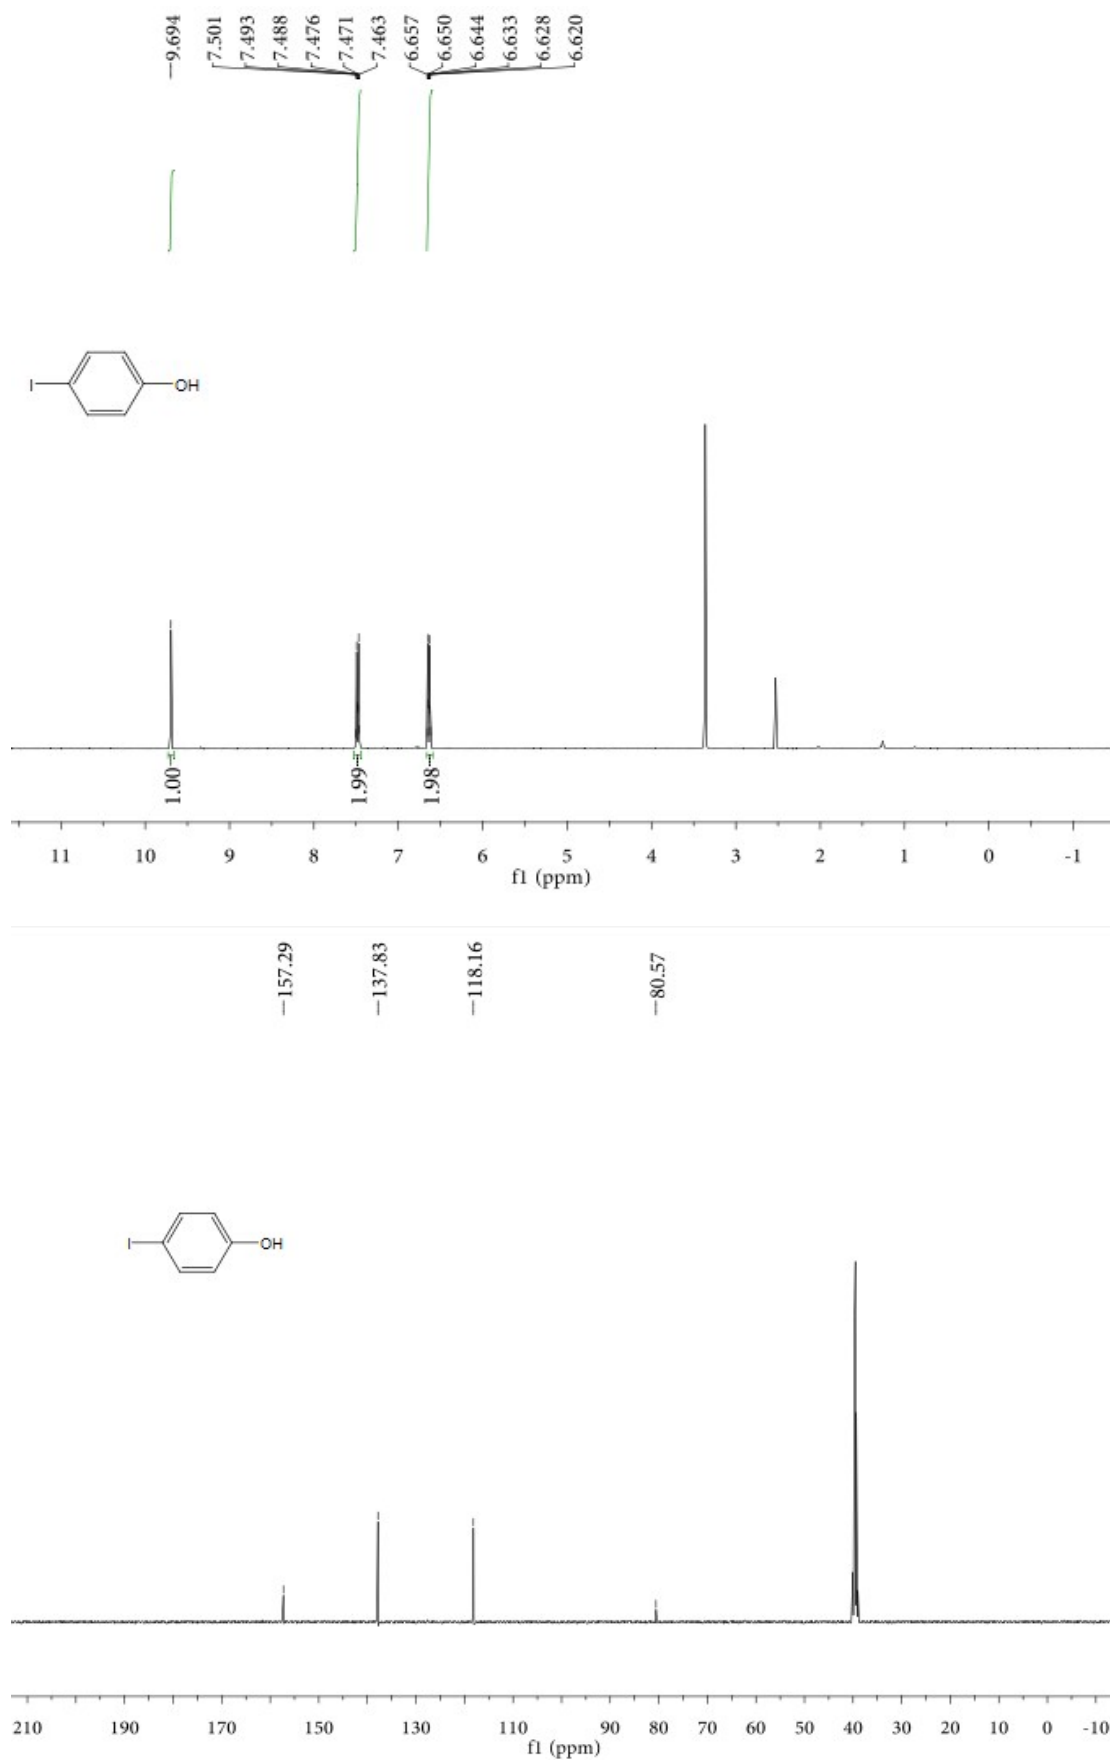

**Figure S9.** <sup>1</sup>H NMR of **7b** (400 MHz, DMSO-*d*<sub>6</sub>) and <sup>13</sup>C NMR of **7b** (125 MHz, DMSO-*d*<sub>6</sub>)

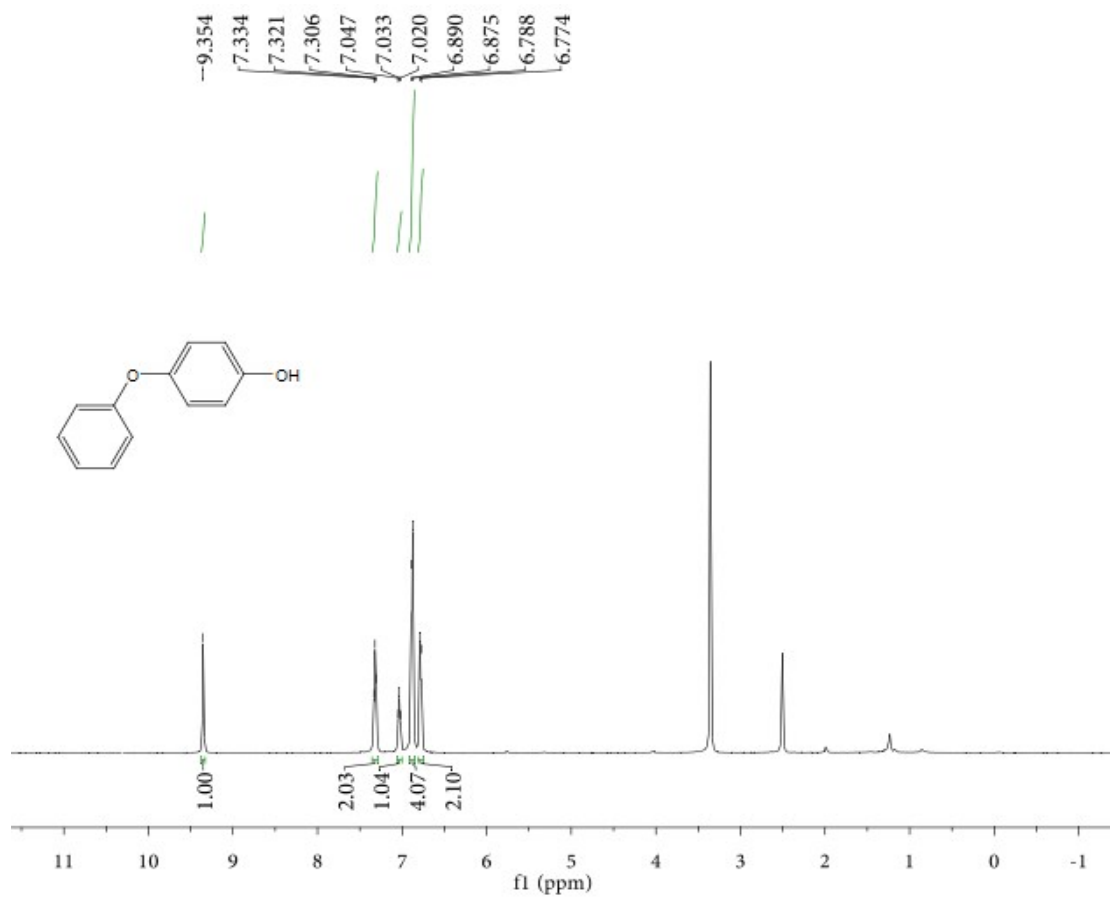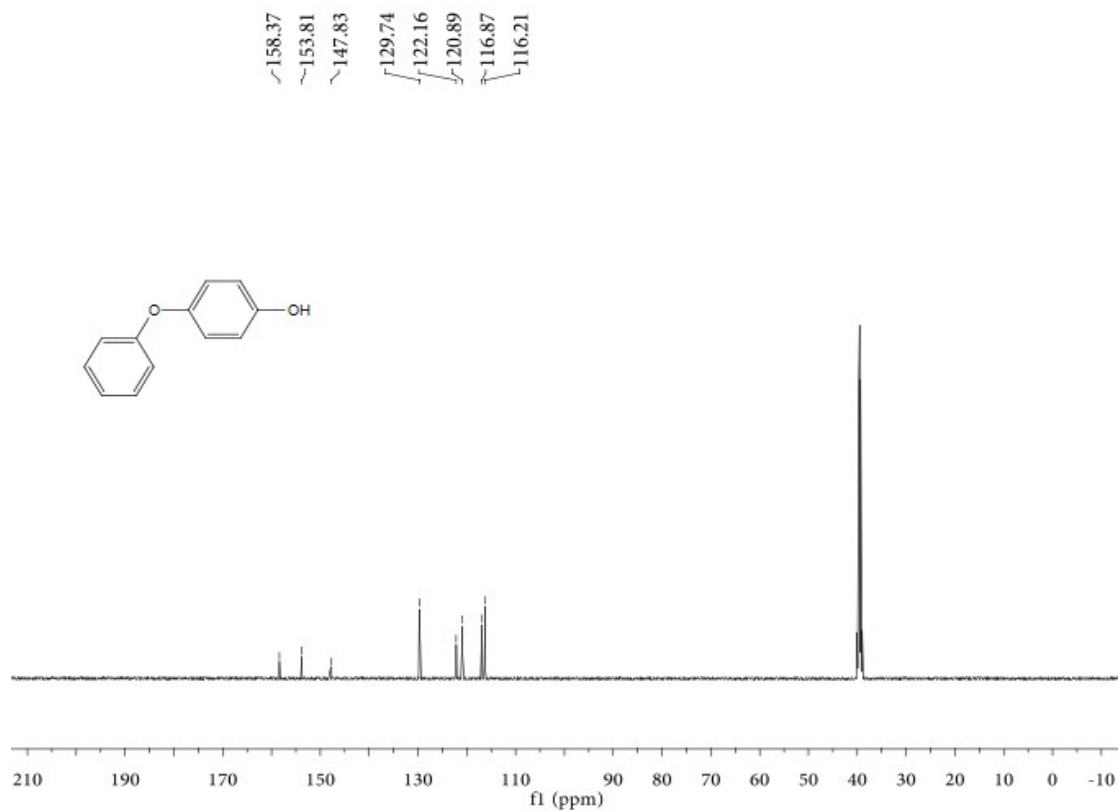

**Figure S10.** <sup>1</sup>H NMR of **8b** (500 MHz, DMSO-*d*<sub>6</sub>) and <sup>13</sup>C NMR of **8b** (125 MHz, DMSO-*d*<sub>6</sub>)

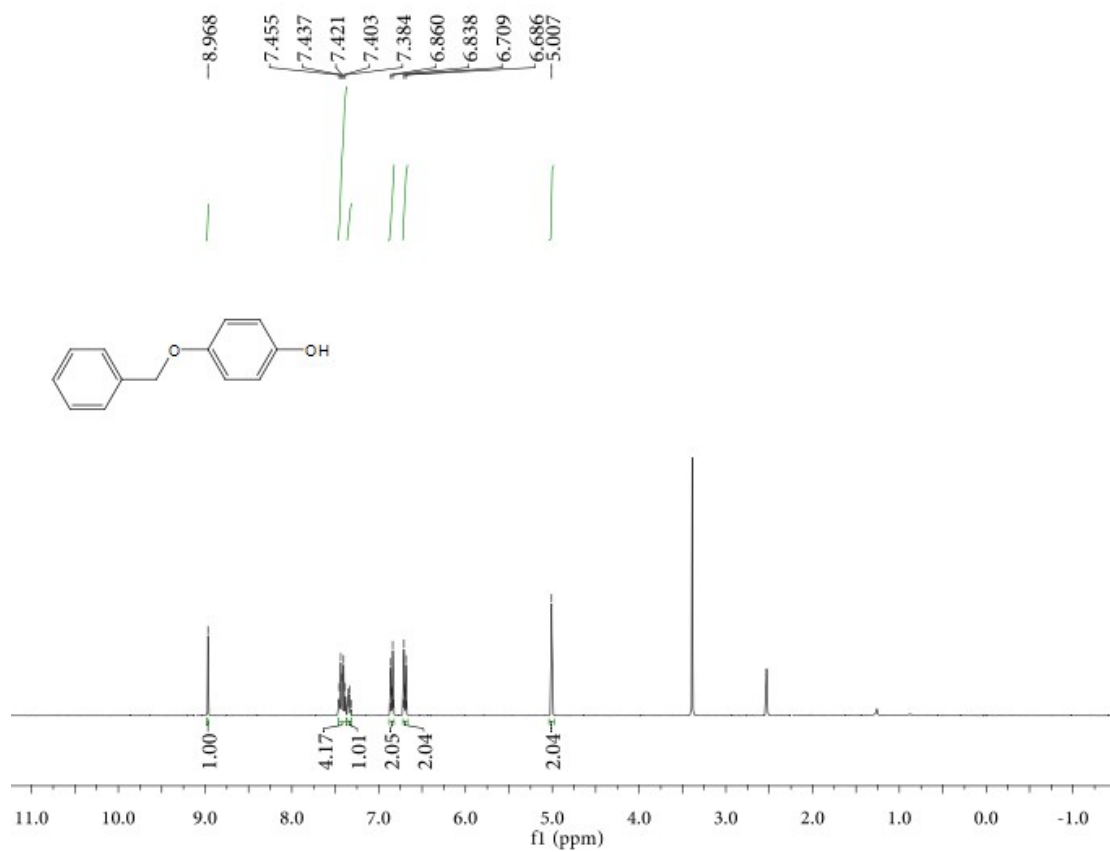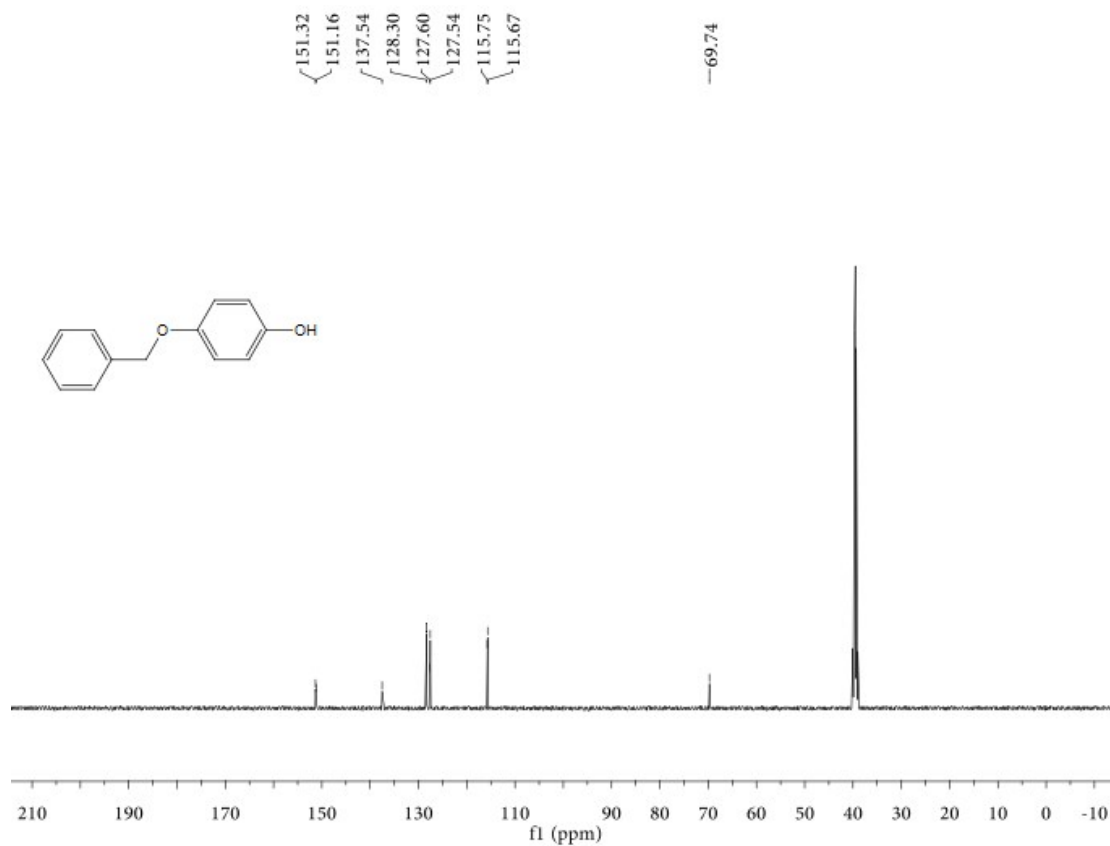

**Figure S11.** <sup>1</sup>H NMR of **9b** (400 MHz, DMSO-*d*<sub>6</sub>) and <sup>13</sup>C NMR of **9b** (125 MHz, DMSO-*d*<sub>6</sub>)

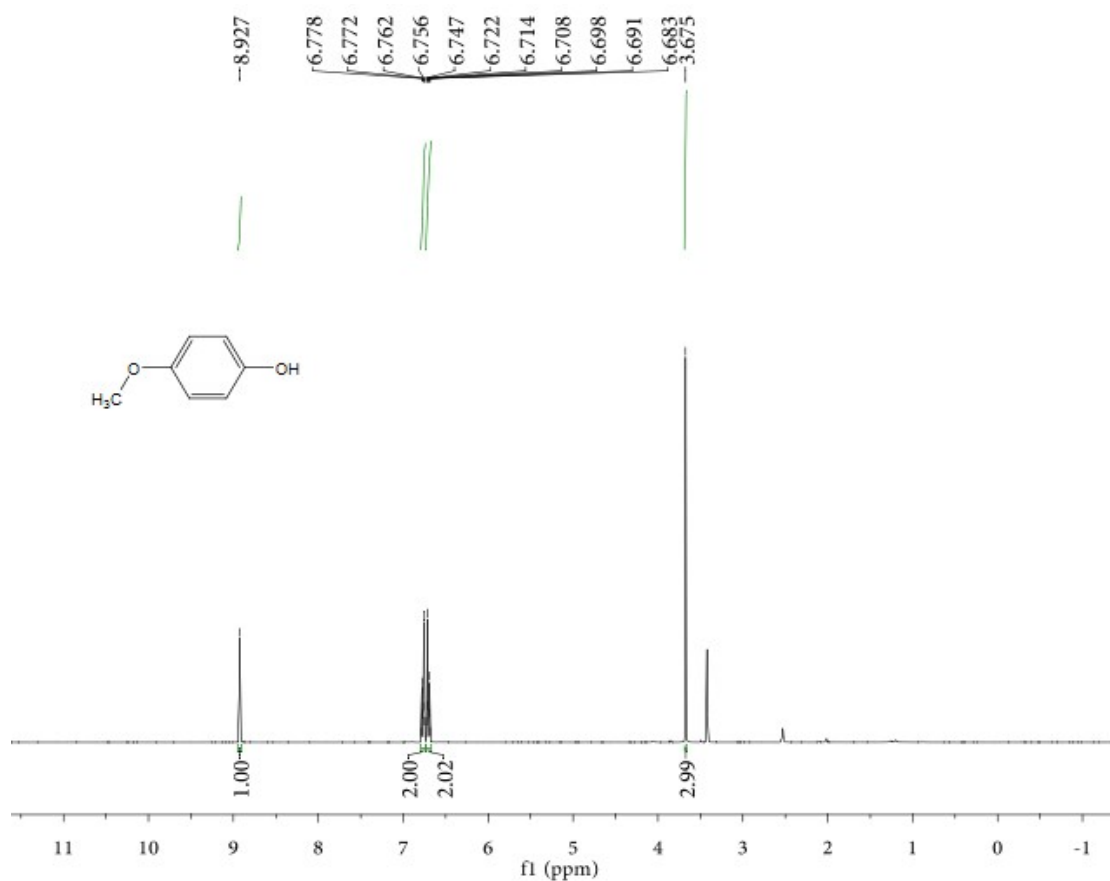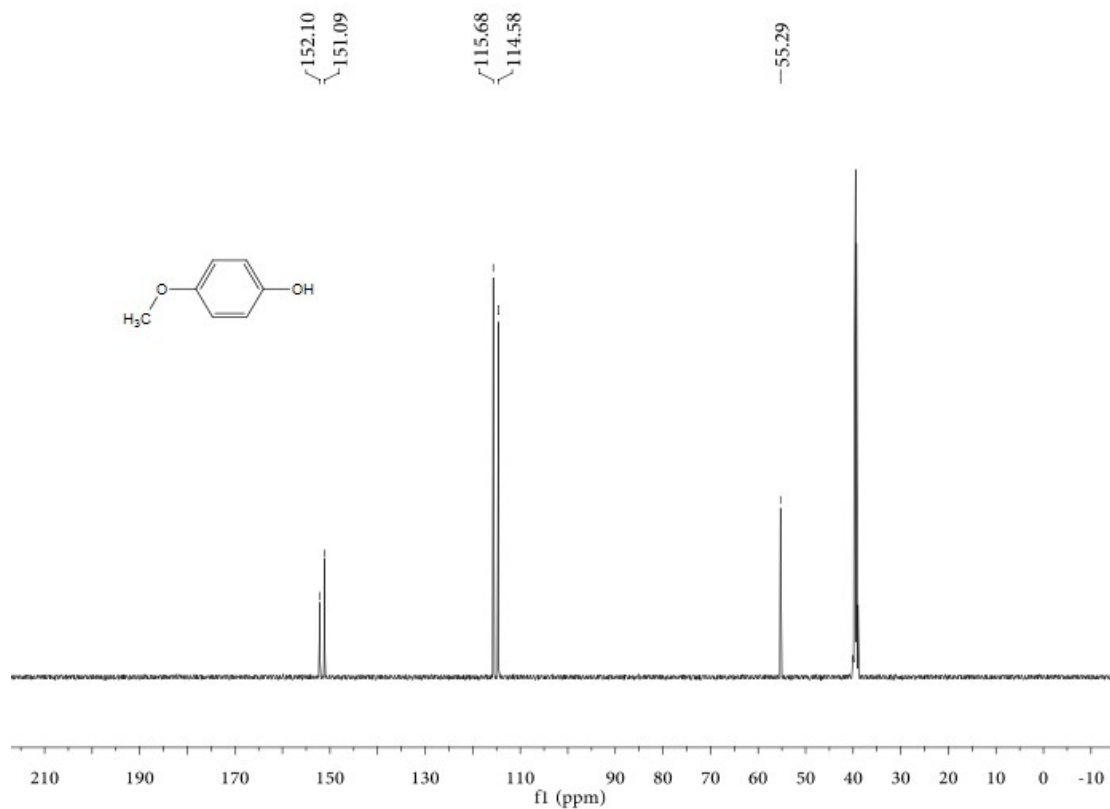

**Figure S12.** <sup>1</sup>H NMR of **10b** (400 MHz, DMSO-*d*<sub>6</sub>) and <sup>13</sup>C NMR of **10b** (125 MHz, DMSO-*d*<sub>6</sub>)

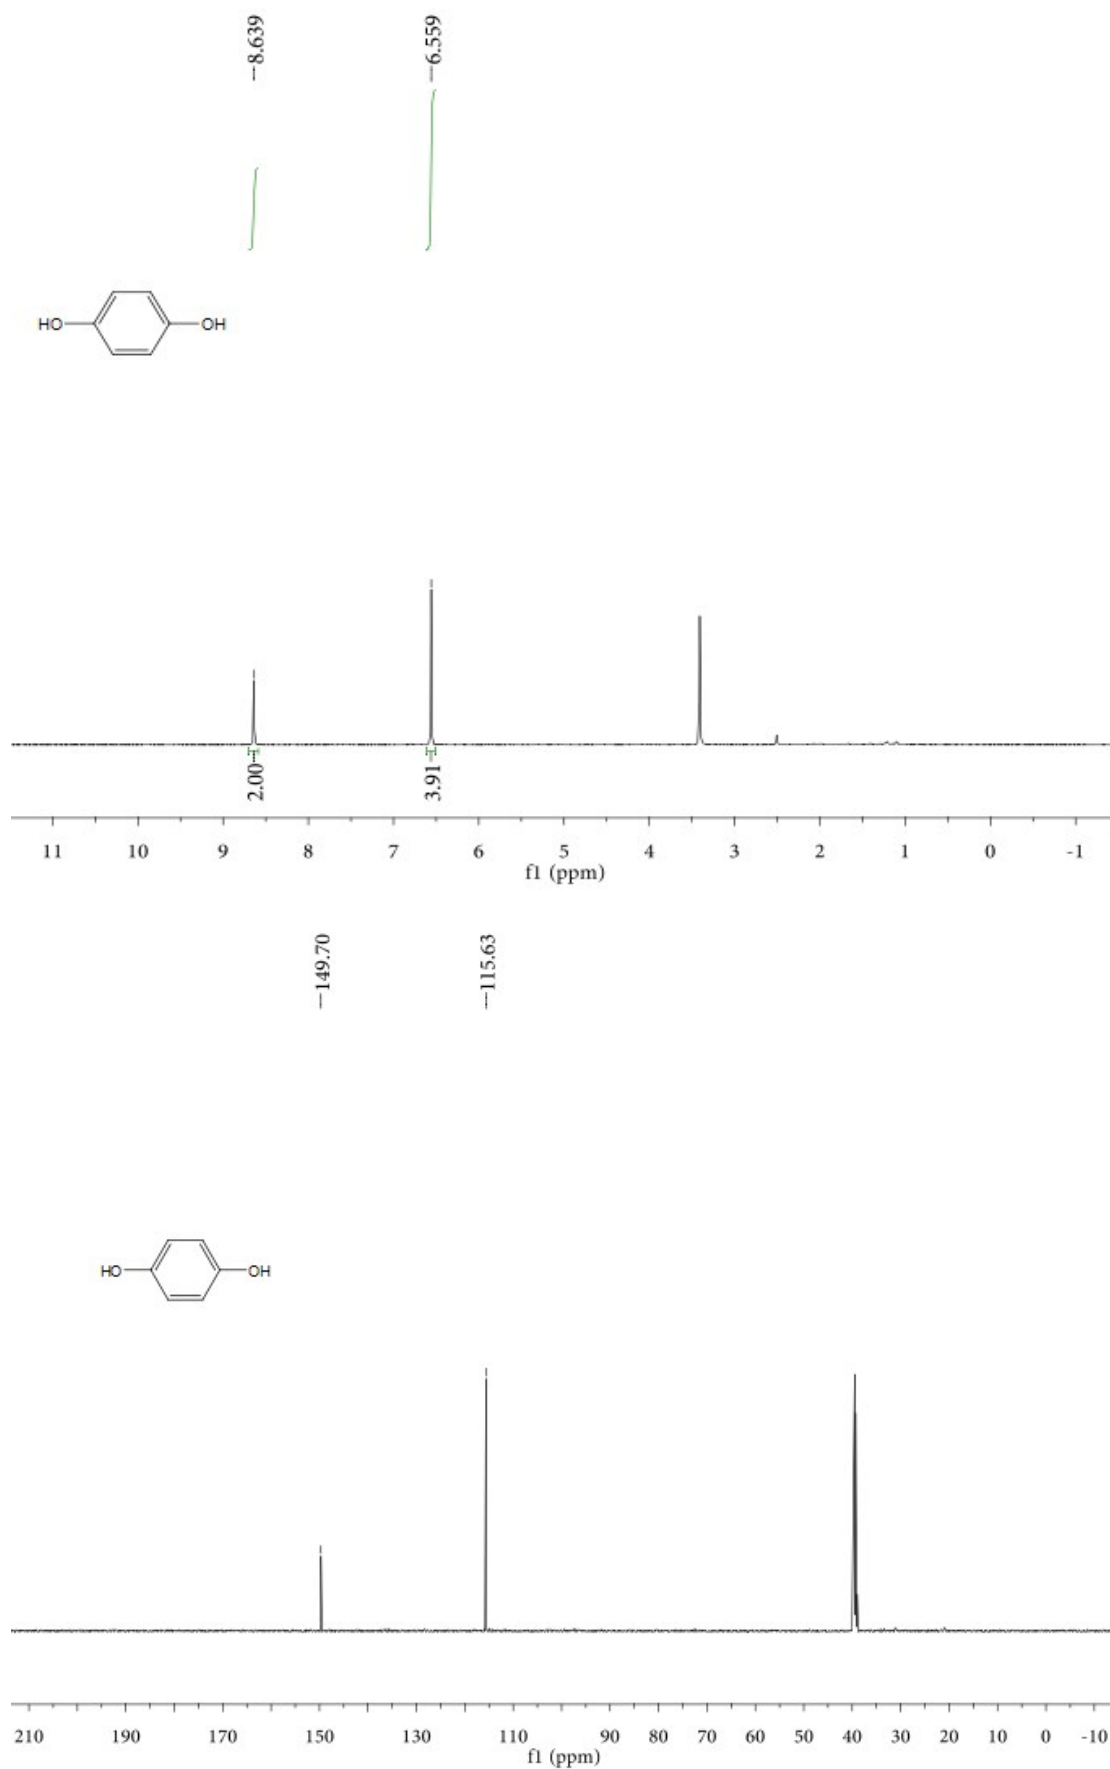

**Figure S13.** <sup>1</sup>H NMR of **11b** (400 MHz, DMSO-*d*<sub>6</sub>) and <sup>13</sup>C NMR of **11b** (125 MHz, DMSO-*d*<sub>6</sub>)



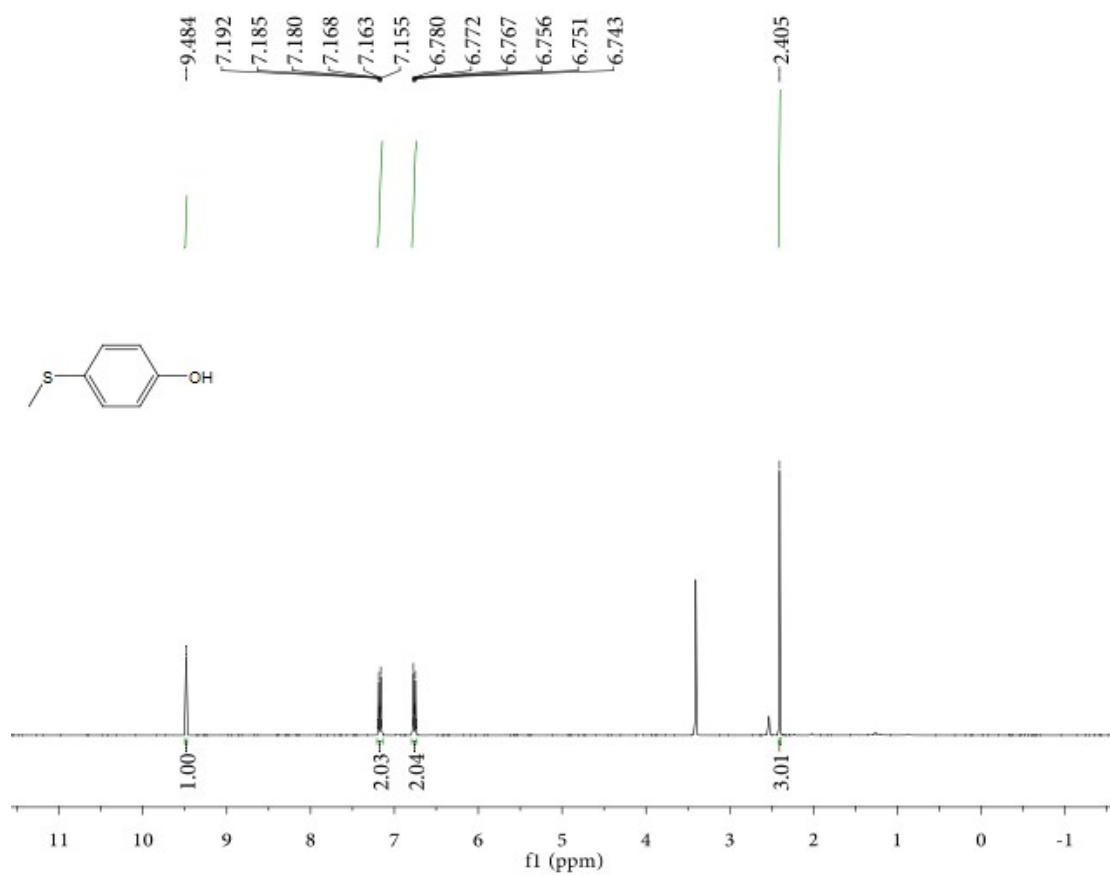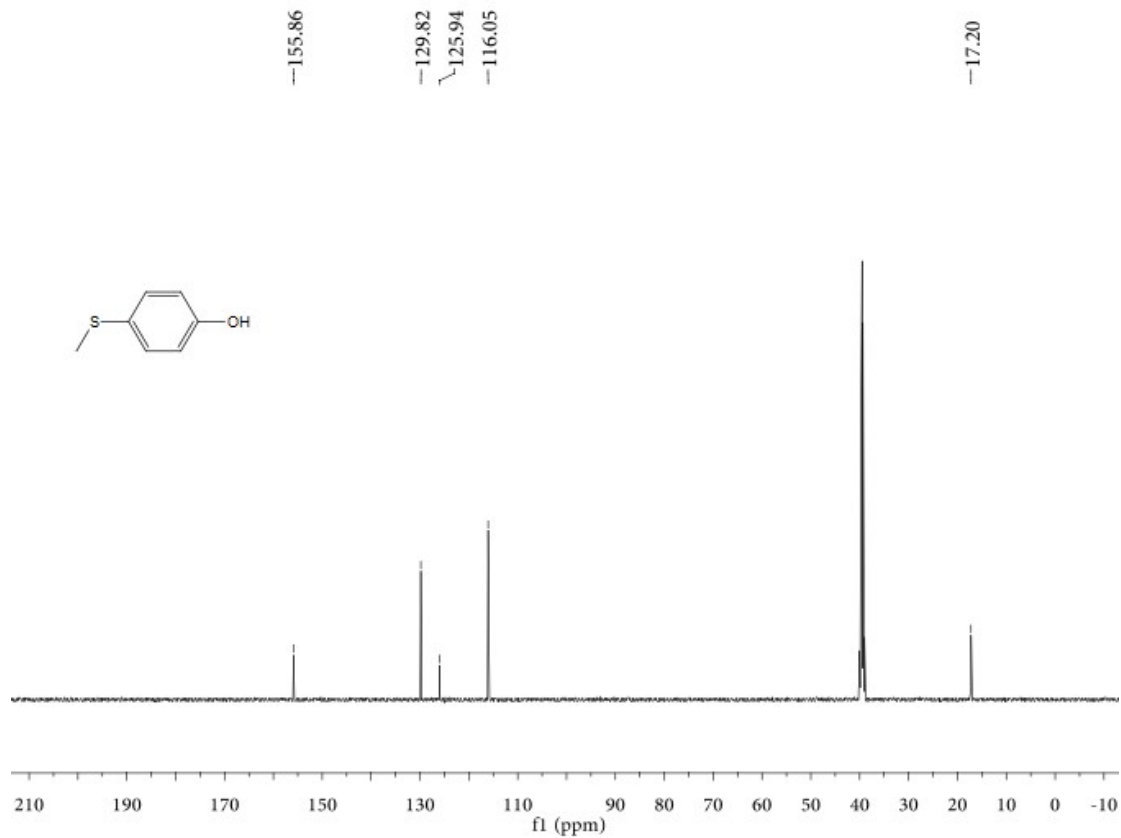

**Figure S14.**  $^1\text{H}$  NMR of **12b** (400 MHz,  $\text{DMSO-}d_6$ ) and  $^{13}\text{C}$  NMR of **12b** (125 MHz,  $\text{DMSO-}d_6$ )

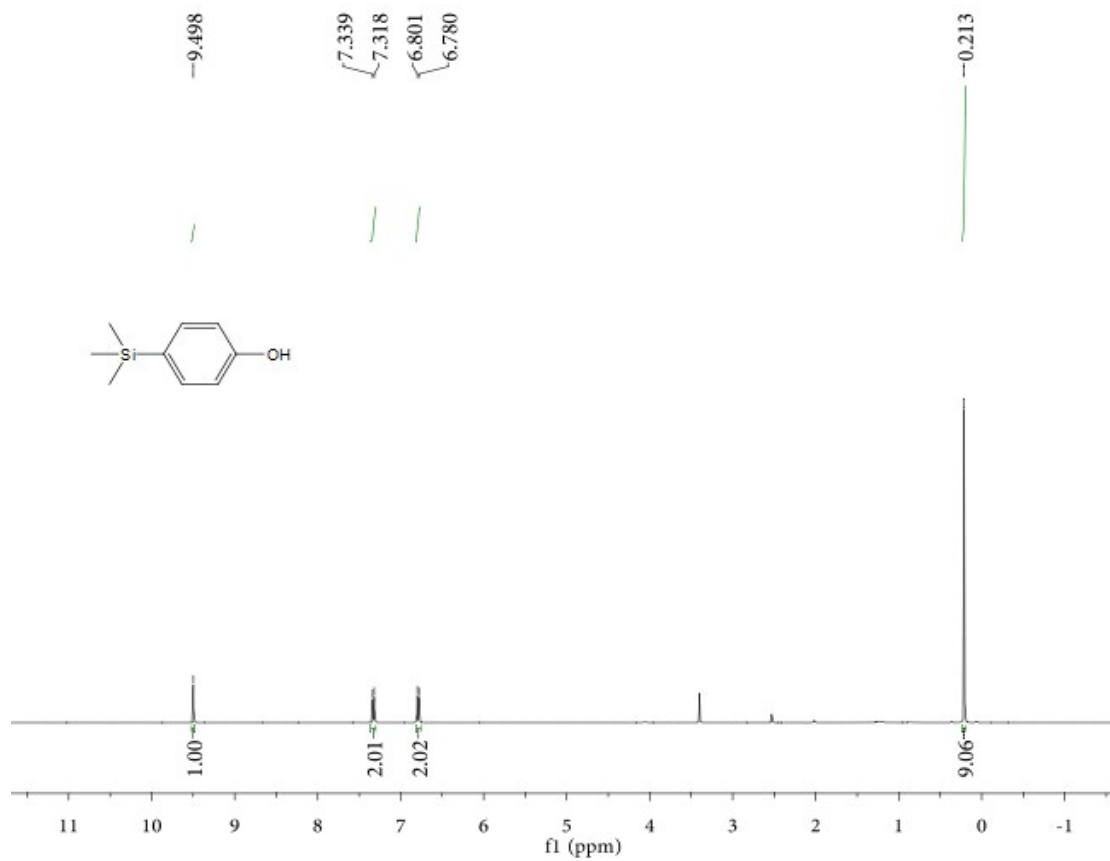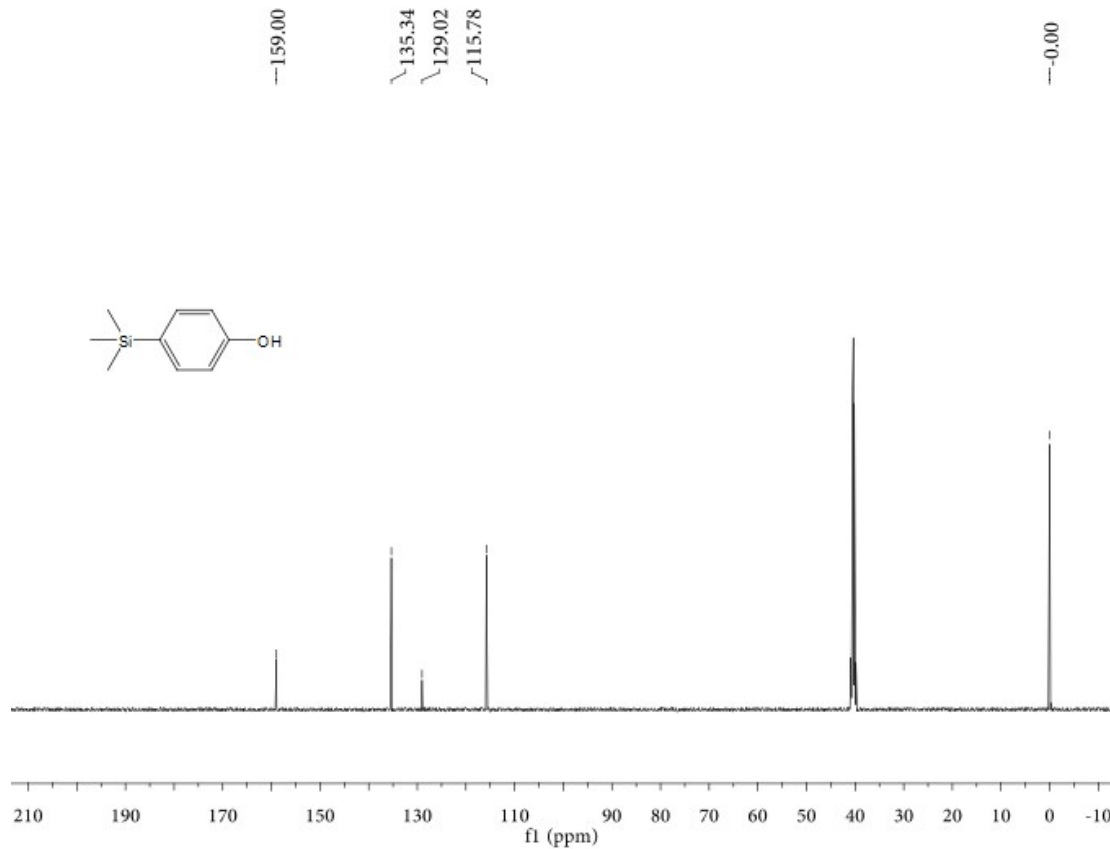

**Figure S15.** <sup>1</sup>H NMR of **13b** (400 MHz, DMSO-*d*<sub>6</sub>) and <sup>13</sup>C NMR of **13b** (125 MHz, DMSO-*d*<sub>6</sub>)

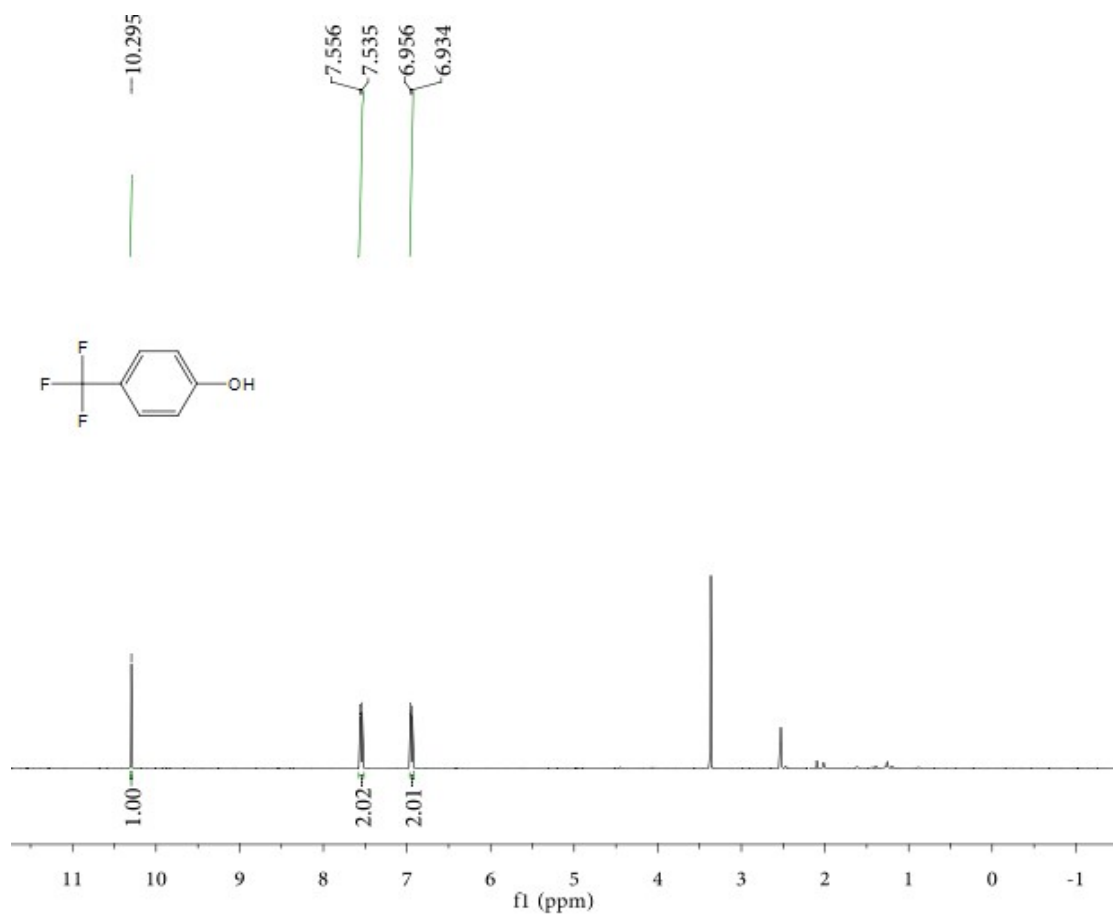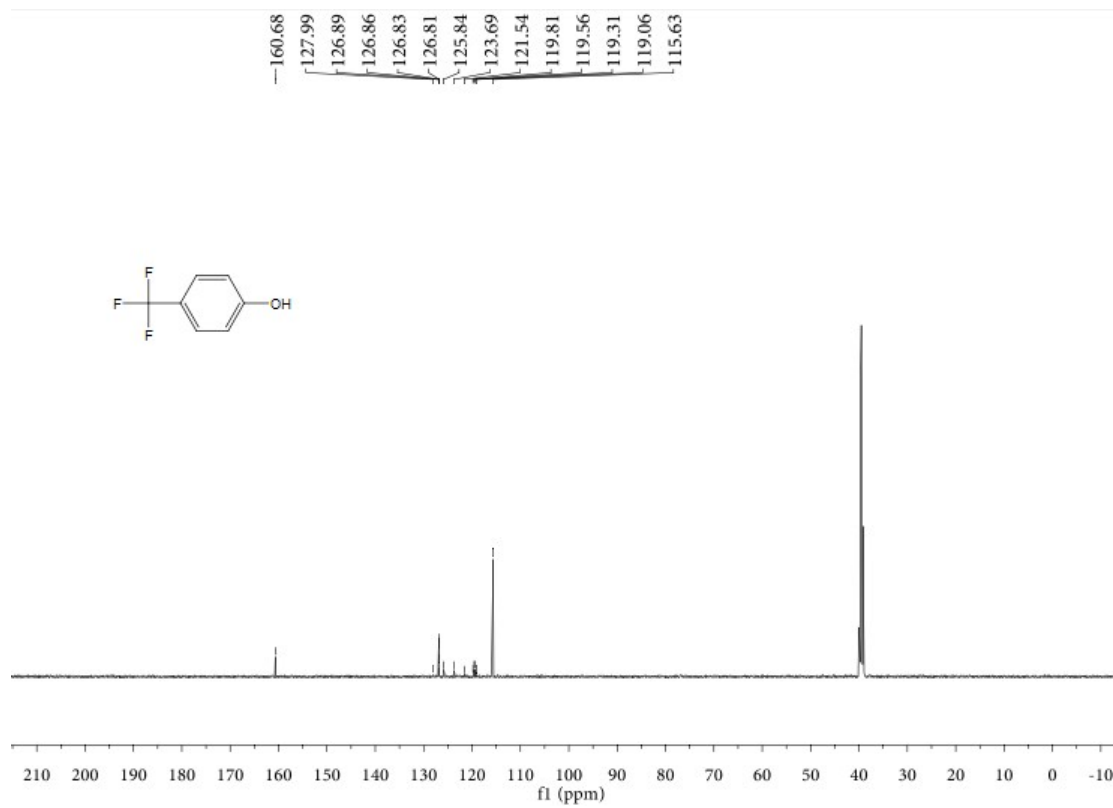

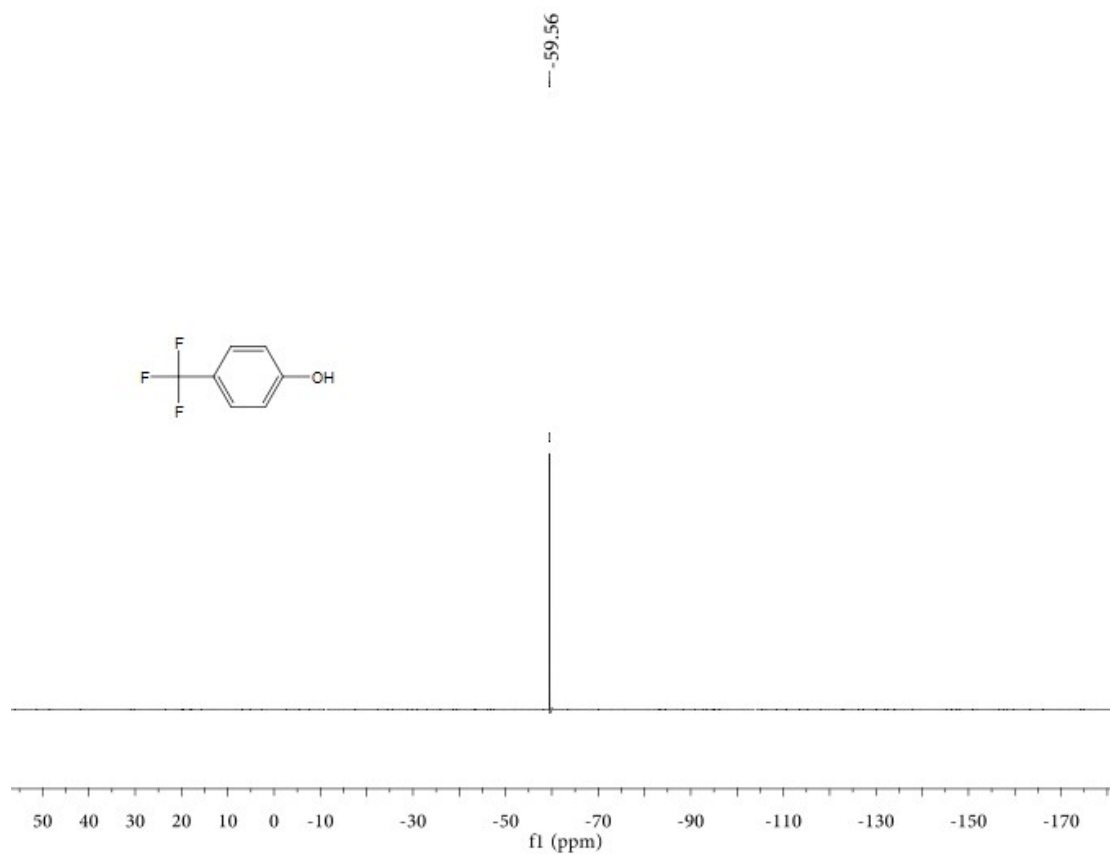

**Figure S16.** <sup>1</sup>H NMR of **14b** (400 MHz, DMSO-*d*<sub>6</sub>) and <sup>13</sup>C NMR of **14b** (125 MHz, DMSO-*d*<sub>6</sub>) and <sup>19</sup>F NMR of **14b** (470 MHz, DMSO-*d*<sub>6</sub>)

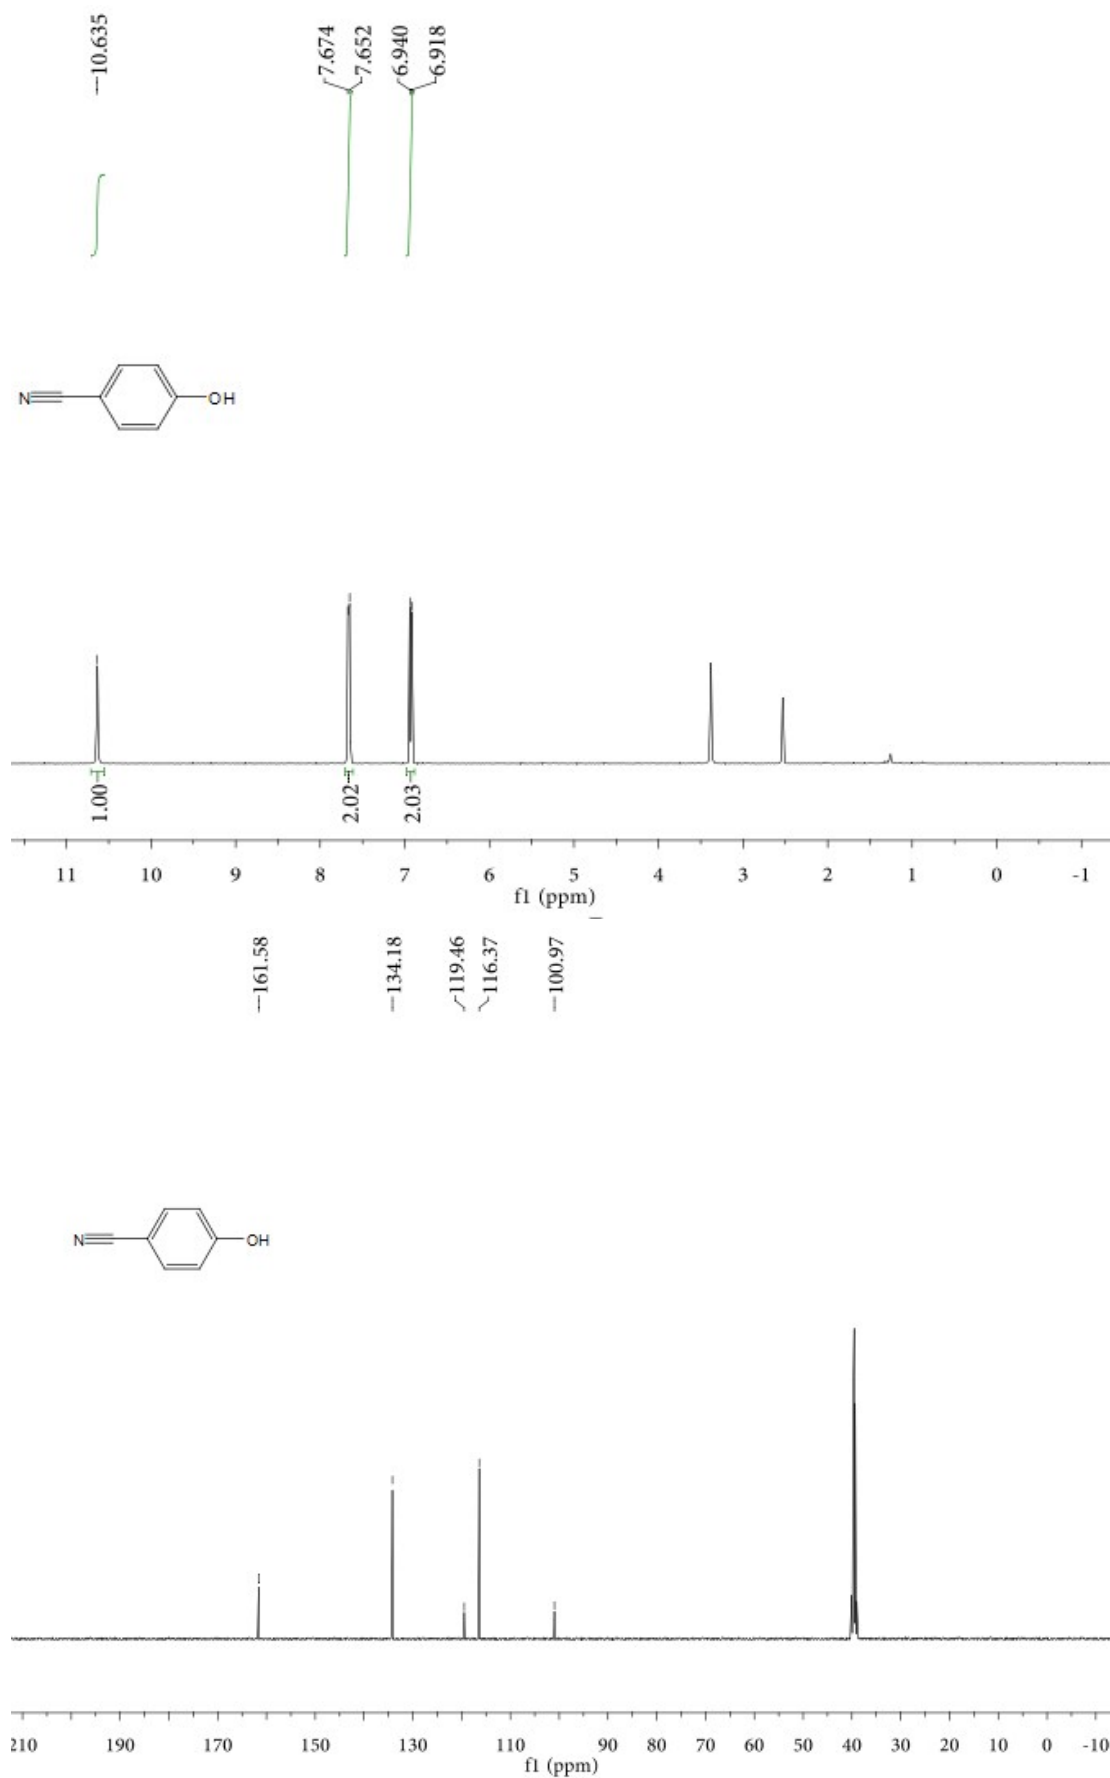

**Figure S17.** <sup>1</sup>H NMR of **15b** (400 MHz, DMSO-*d*<sub>6</sub>) and <sup>13</sup>C NMR of **15b** (125 MHz, DMSO-*d*<sub>6</sub>)

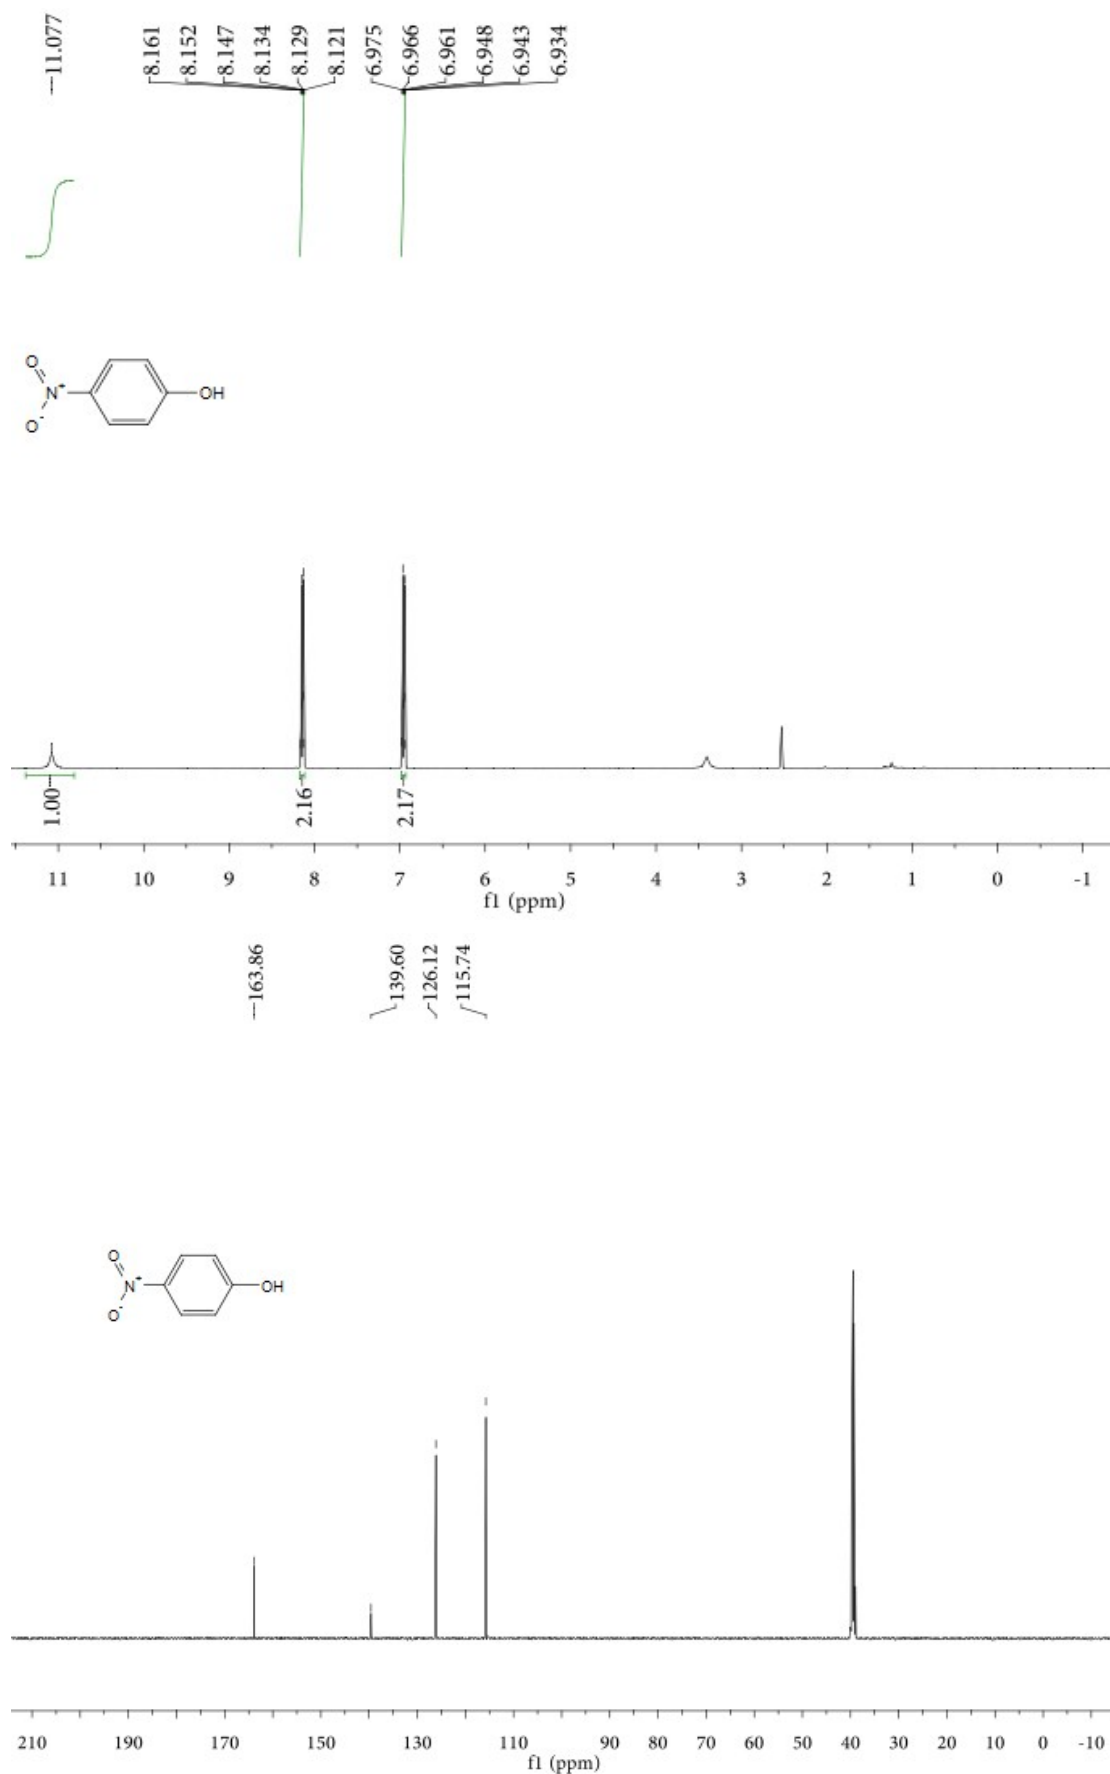

**Figure S18.** <sup>1</sup>H NMR of **16b** (400 MHz, DMSO-*d*<sub>6</sub>) and <sup>13</sup>C NMR of **16b** (125 MHz, DMSO-*d*<sub>6</sub>)

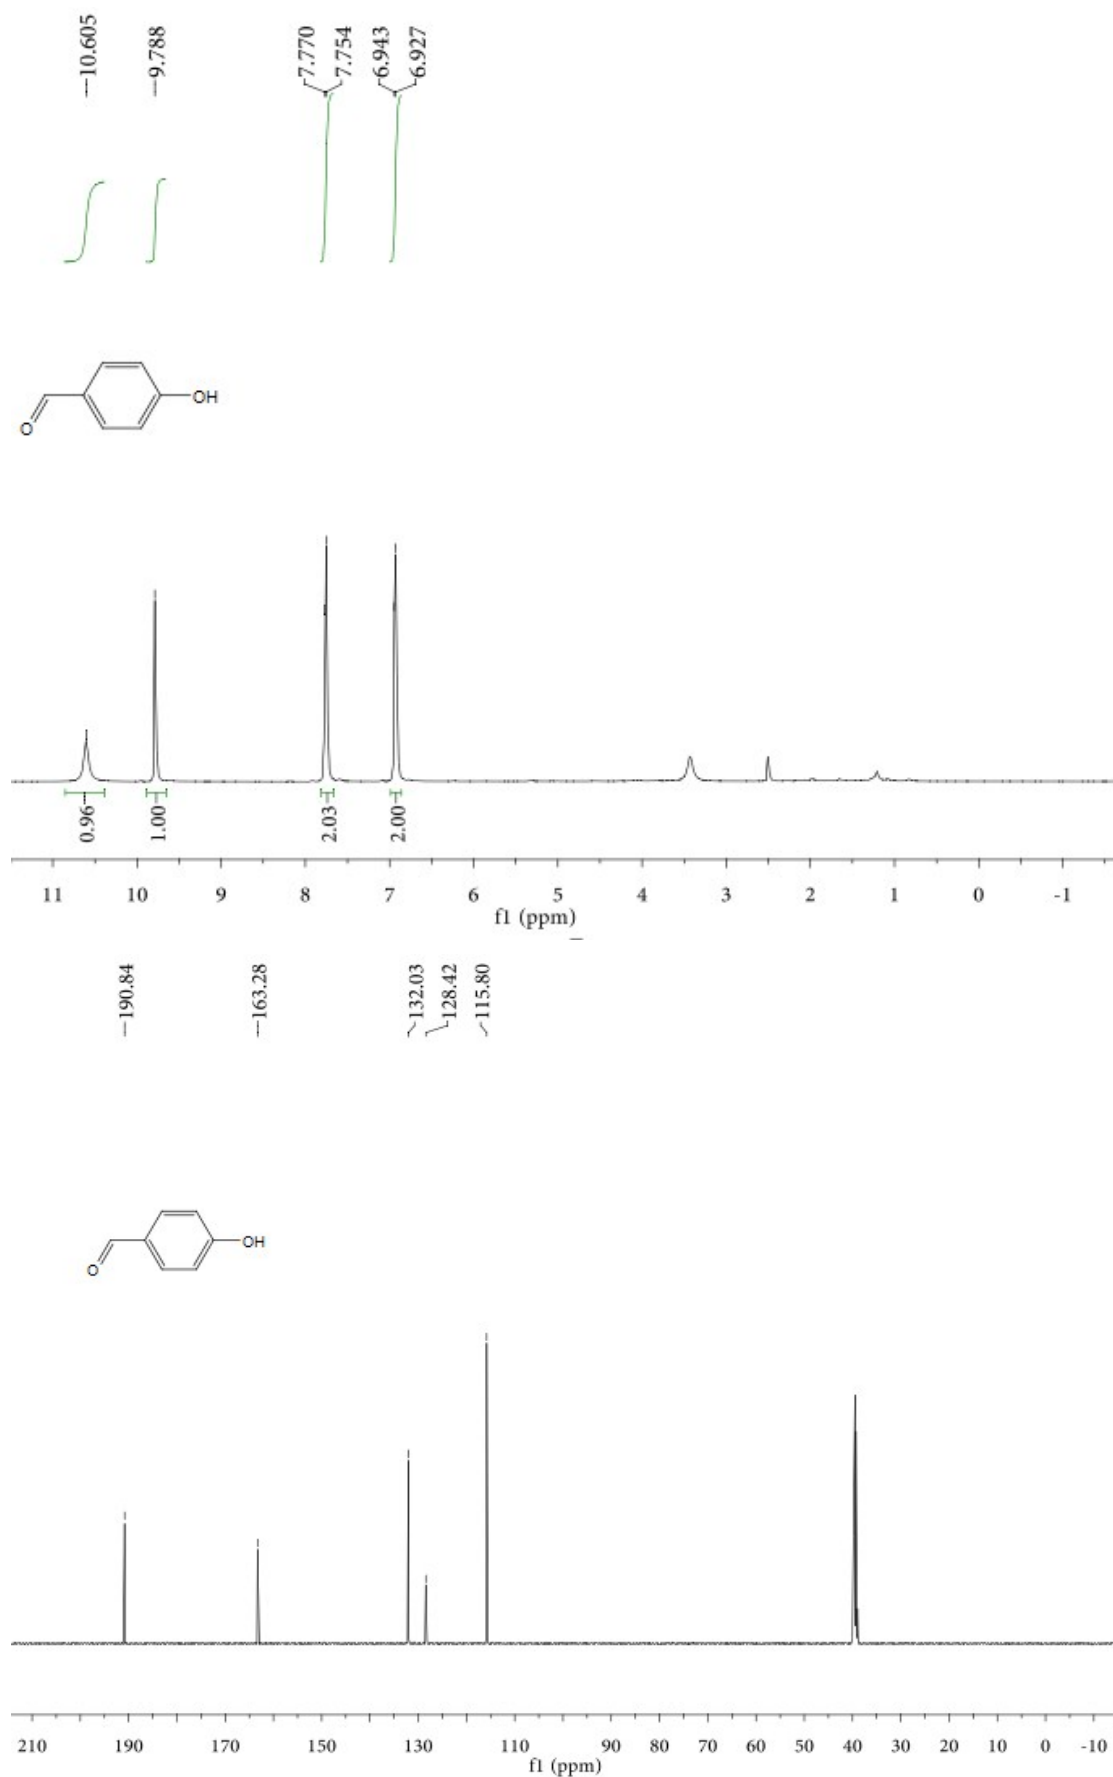

**Figure S19.** <sup>1</sup>H NMR of **17b** (500 MHz, DMSO-*d*<sub>6</sub>) and <sup>13</sup>C NMR of **17b** (125 MHz, DMSO-*d*<sub>6</sub>)

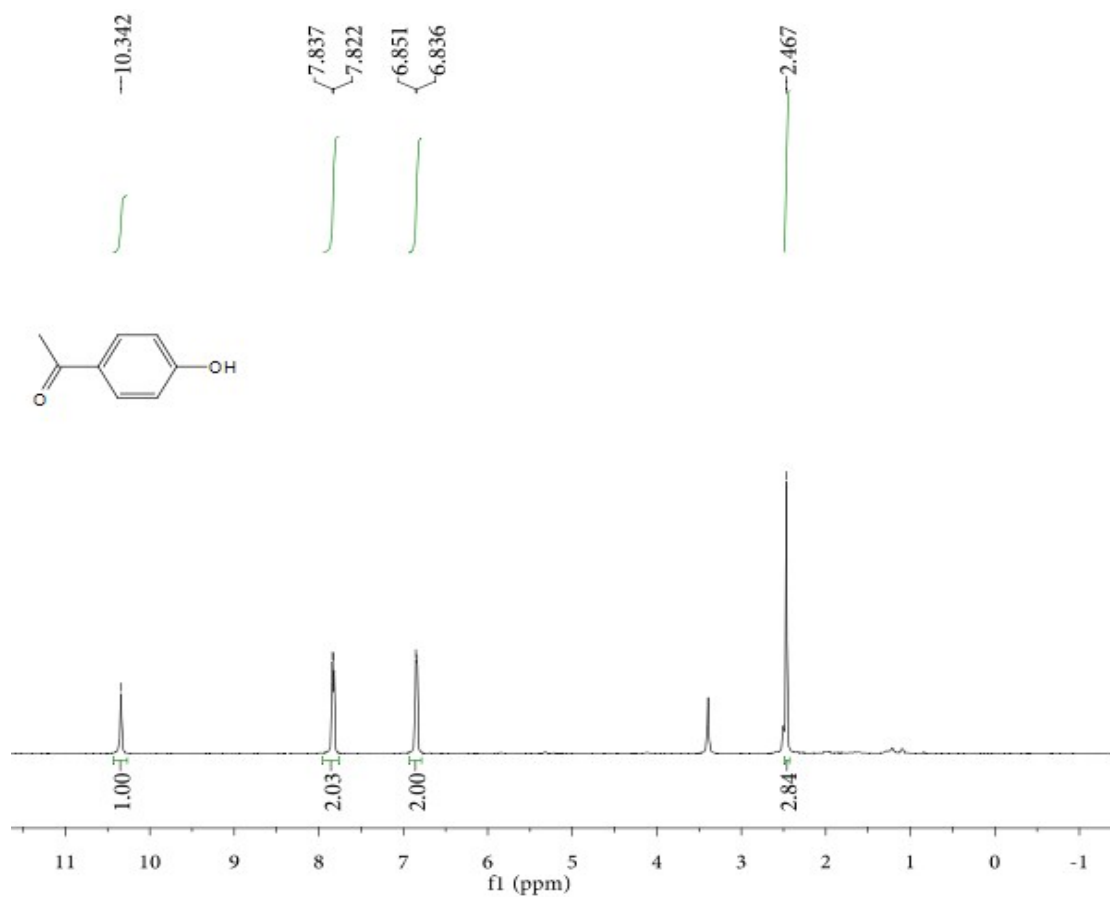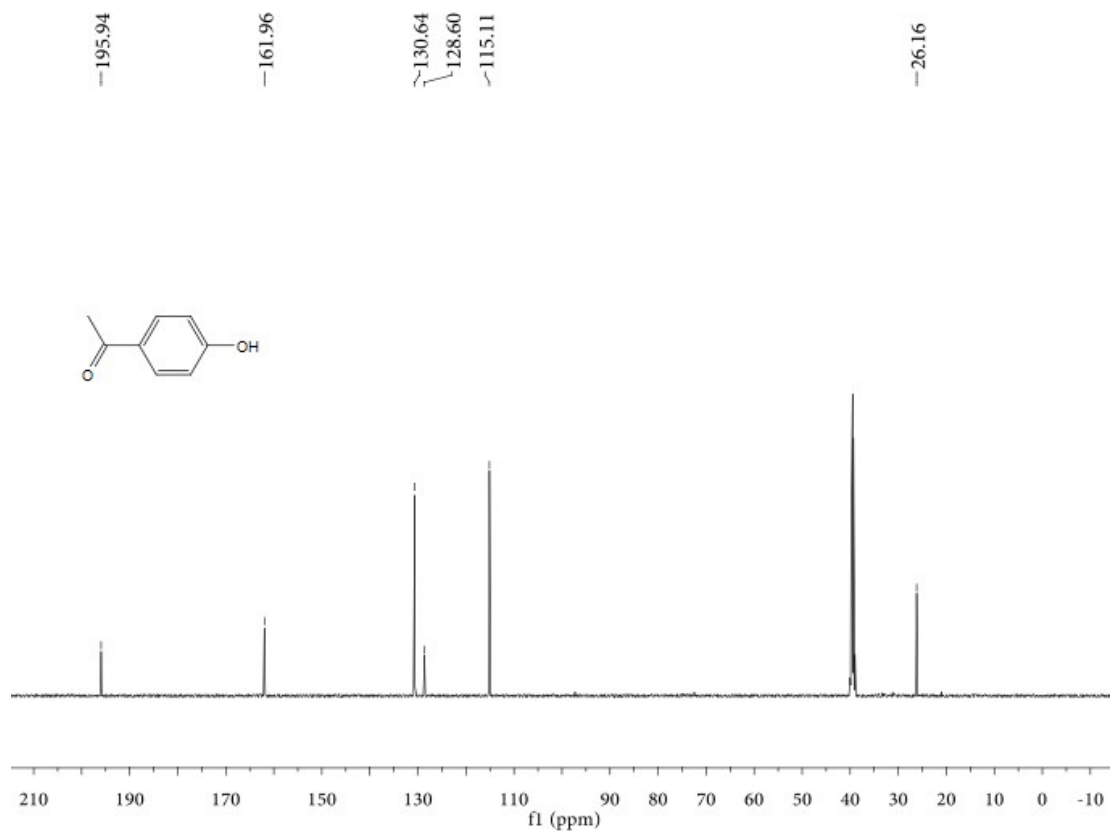

**Figure S20.**  $^1\text{H NMR}$  of **18b** (500 MHz,  $\text{DMSO-}d_6$ ) and  $^{13}\text{C NMR}$  of **18b** (125 MHz,  $\text{DMSO-}d_6$ )



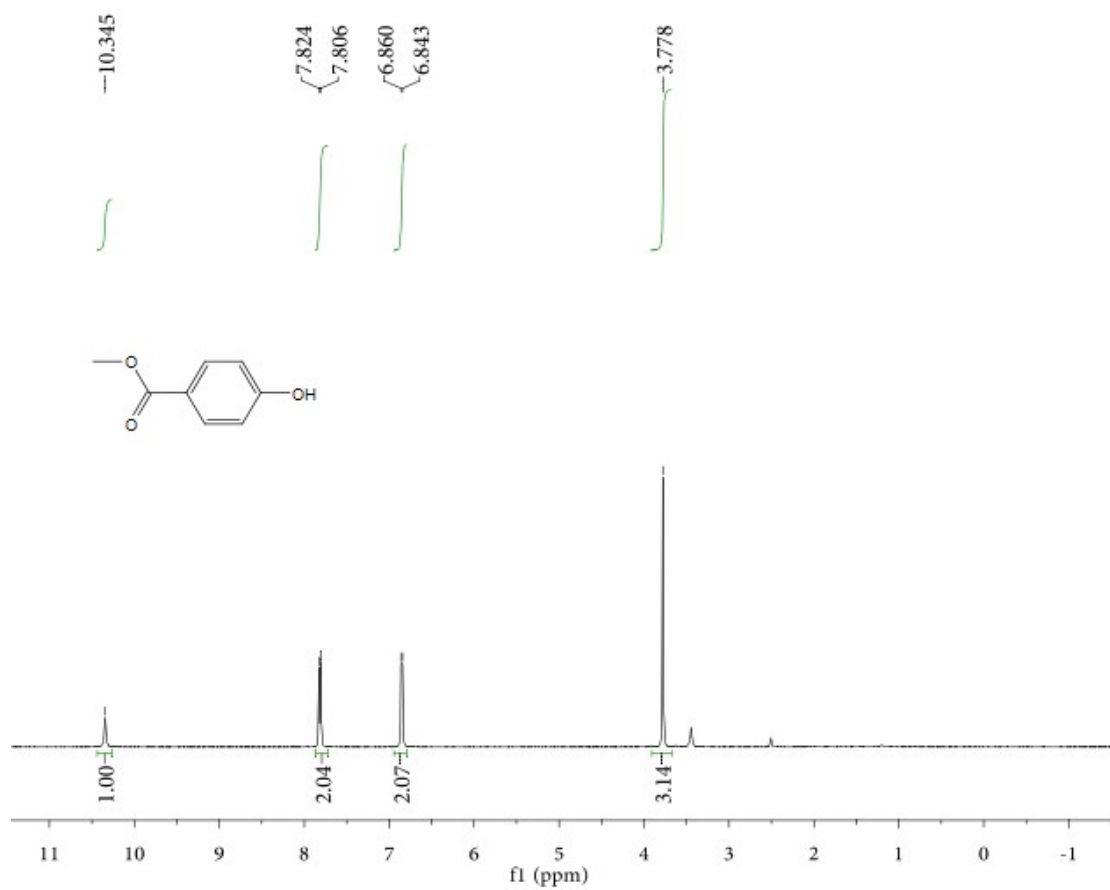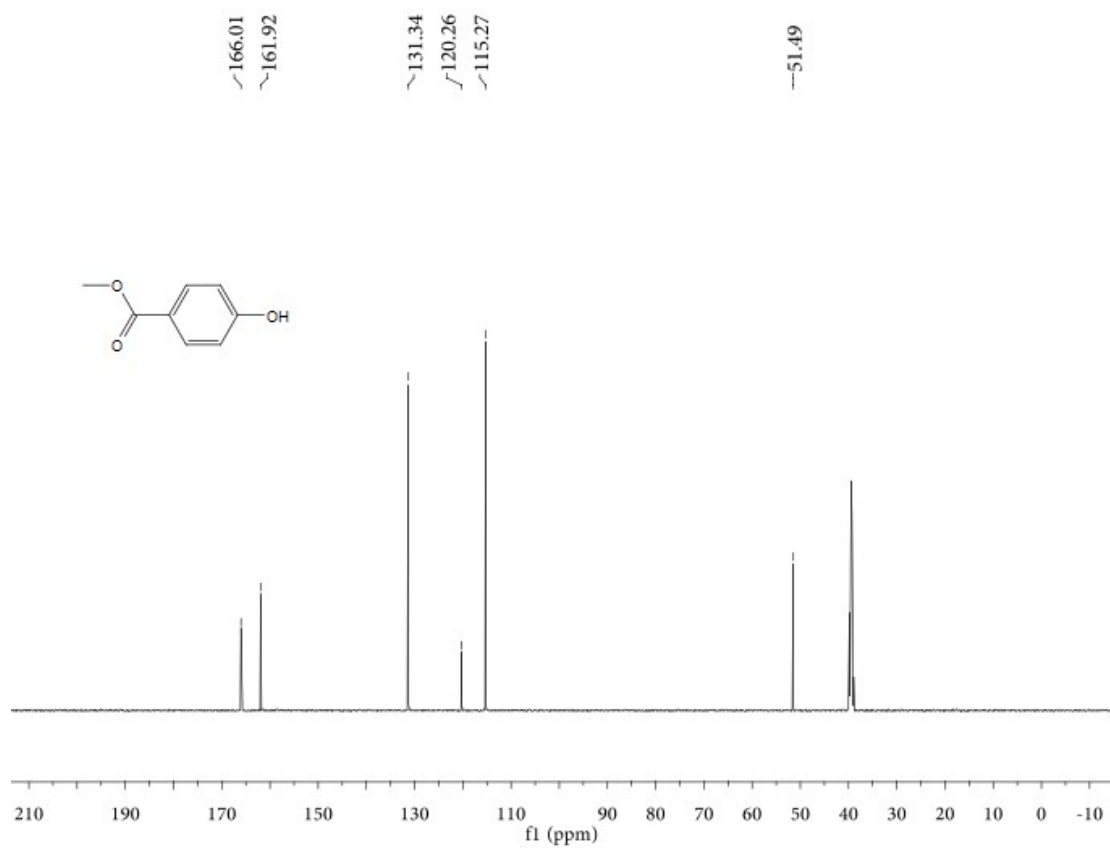

**Figure S21.** <sup>1</sup>H NMR of **19b** (400 MHz, DMSO-*d*<sub>6</sub>) and <sup>13</sup>C NMR of **19b** (125 MHz, DMSO-*d*<sub>6</sub>)

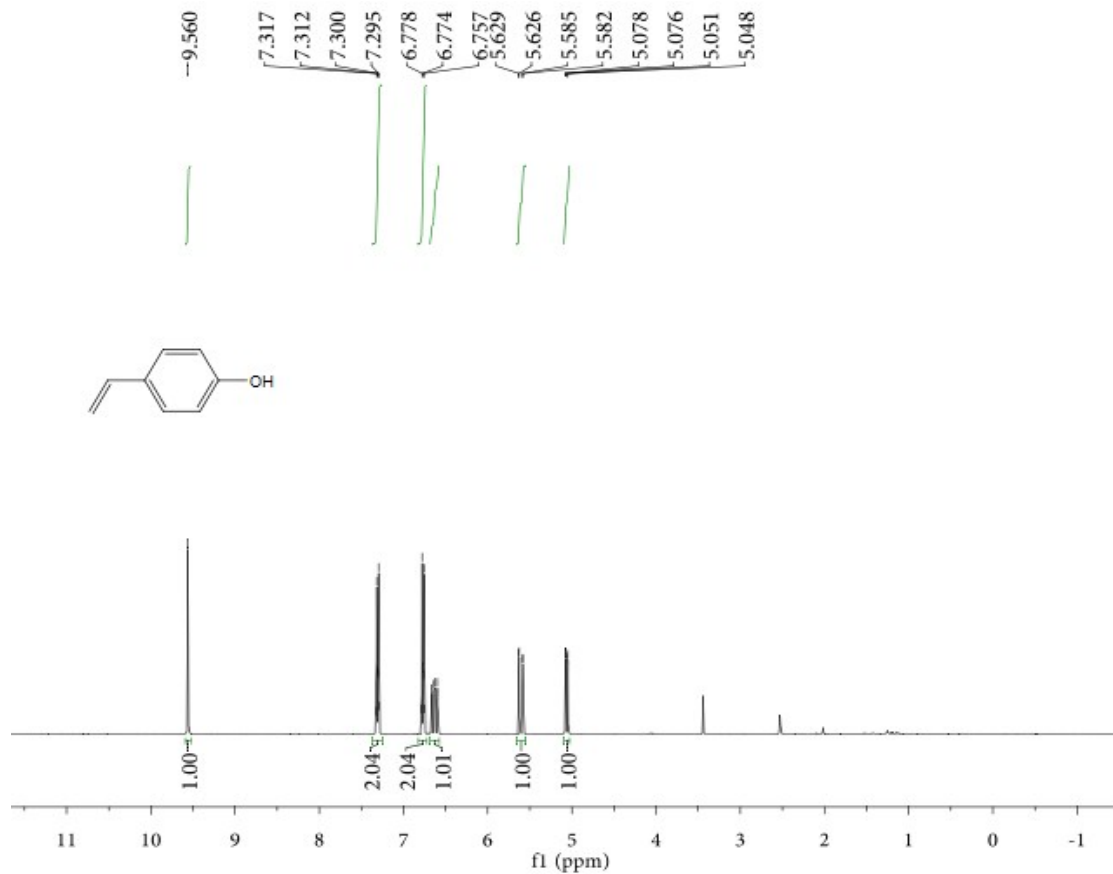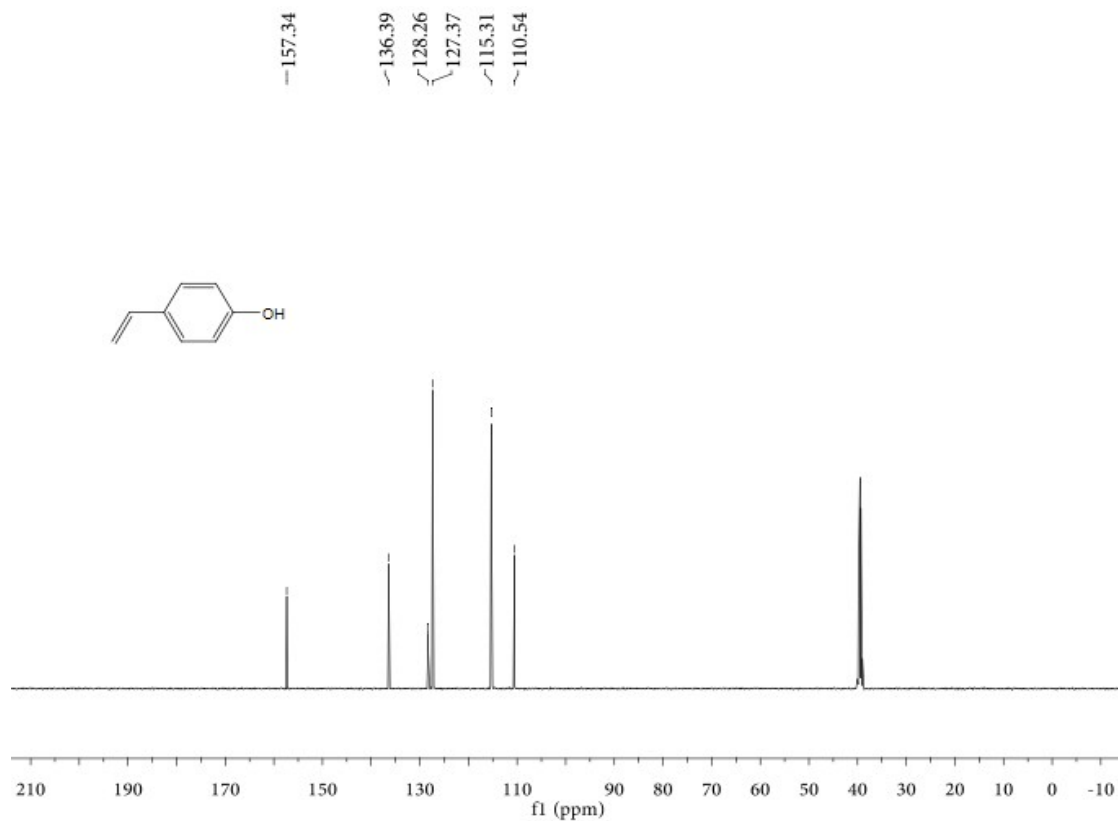

**Figure S22.** <sup>1</sup>H NMR of **20b** (400 MHz, DMSO-*d*<sub>6</sub>) and <sup>13</sup>C NMR of **20b** (125 MHz, DMSO-*d*<sub>6</sub>)

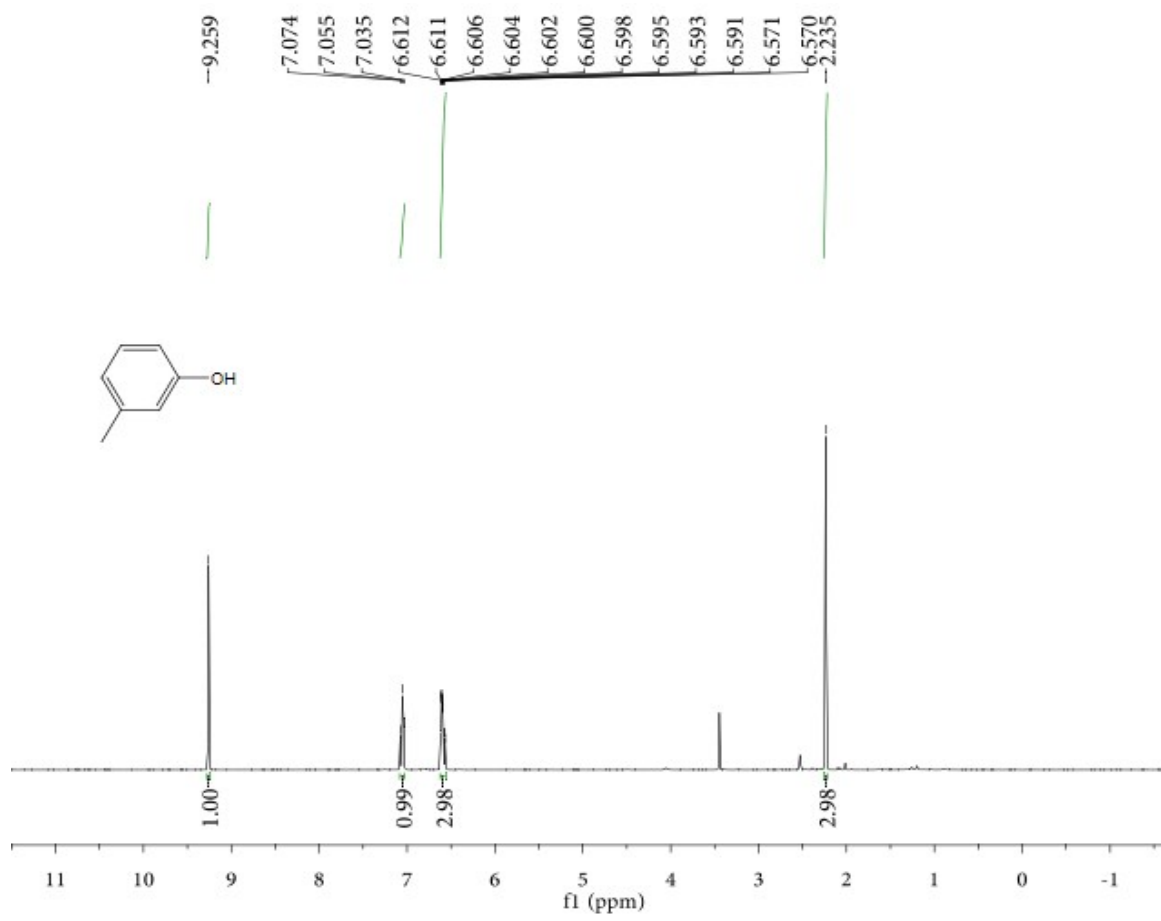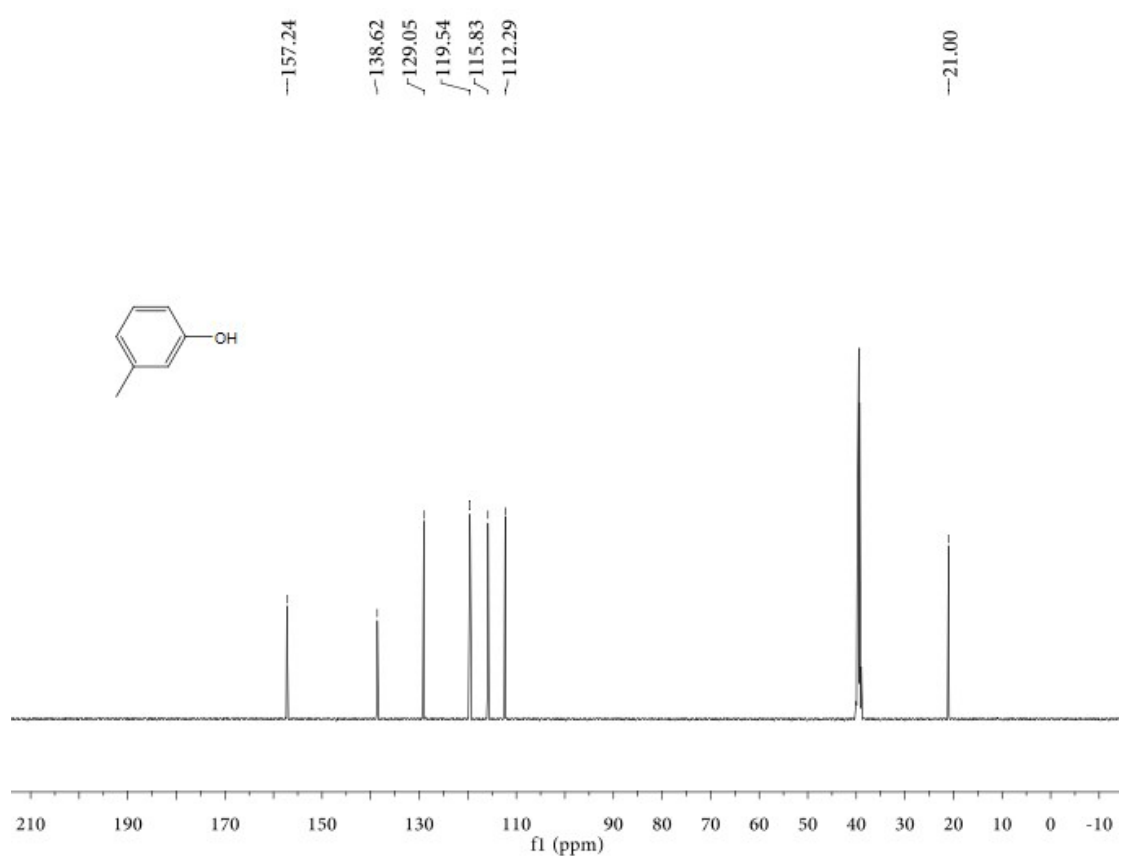

**Figure S23.**  $^1\text{H}$  NMR of **21b** (400 MHz,  $\text{DMSO-}d_6$ ) and  $^{13}\text{C}$  NMR of **21b** (125 MHz,  $\text{DMSO-}d_6$ )

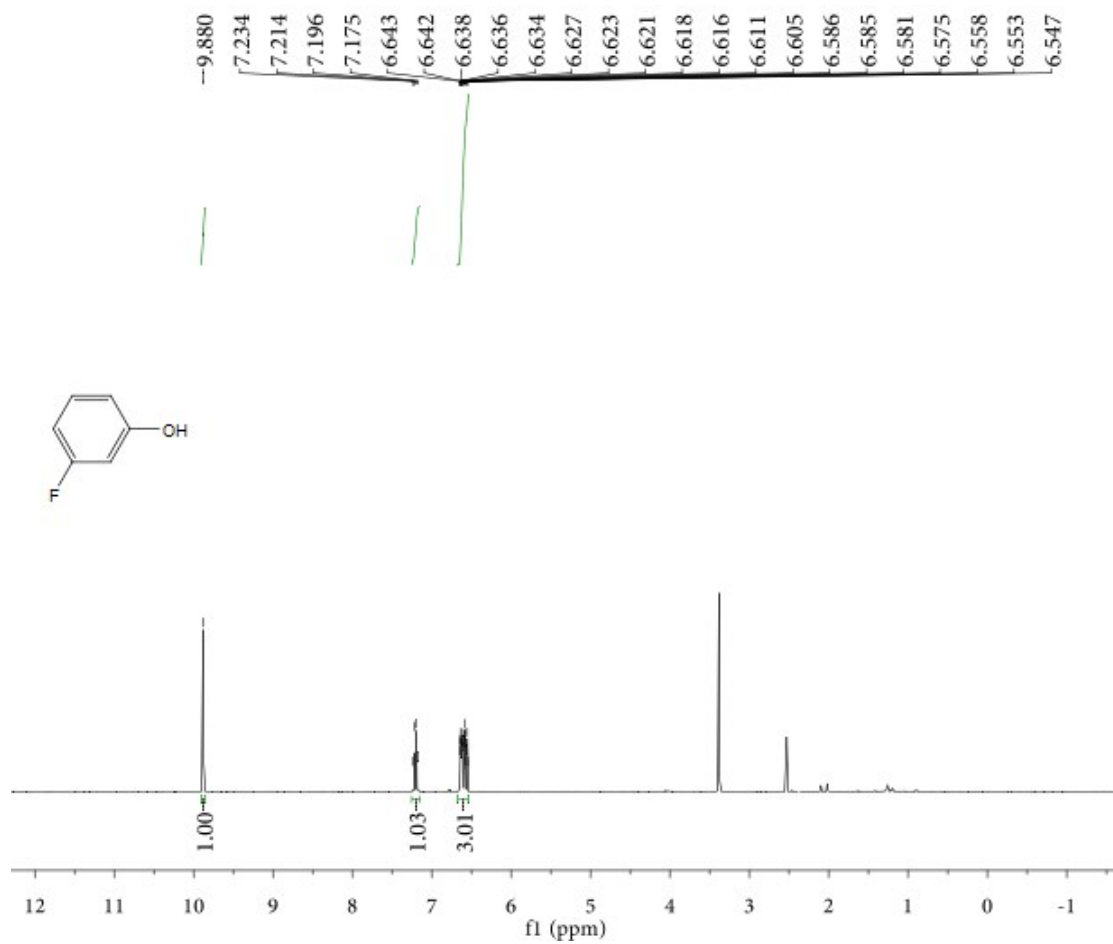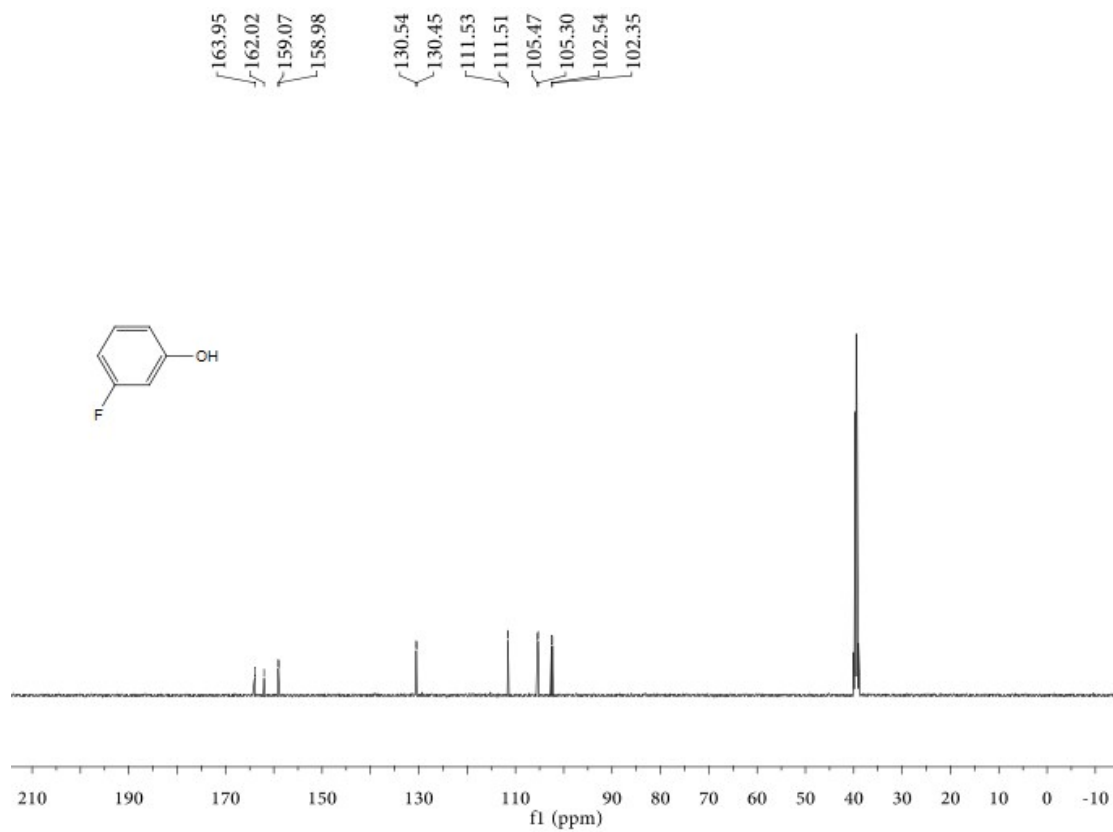

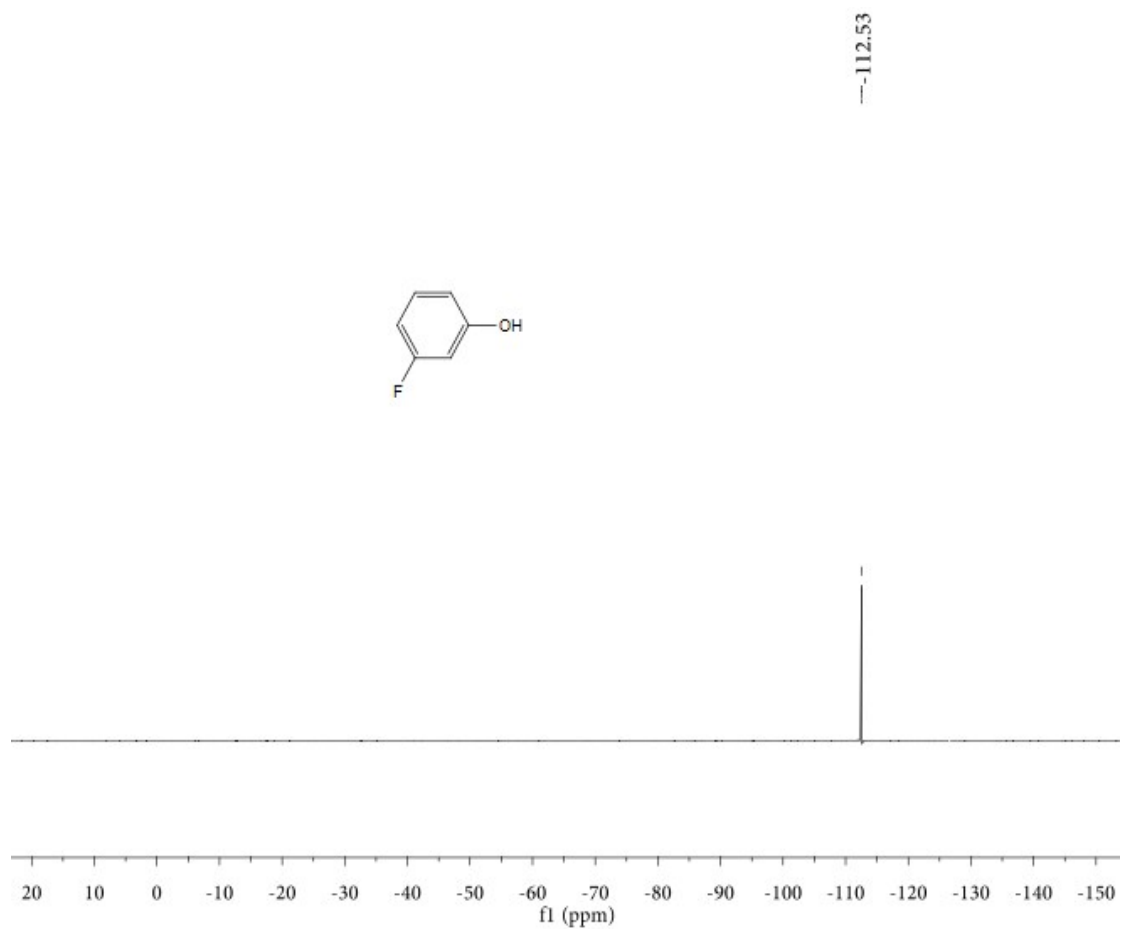

**Figure S24.**  $^1\text{H}$  NMR of **22b** (400 MHz,  $\text{DMSO-}d_6$ ) and  $^{13}\text{C}$  NMR of **22b** (125 MHz,  $\text{DMSO-}d_6$ ) and  $^{19}\text{F}$  NMR of **22b** (470 MHz,  $\text{DMSO-}d_6$ )

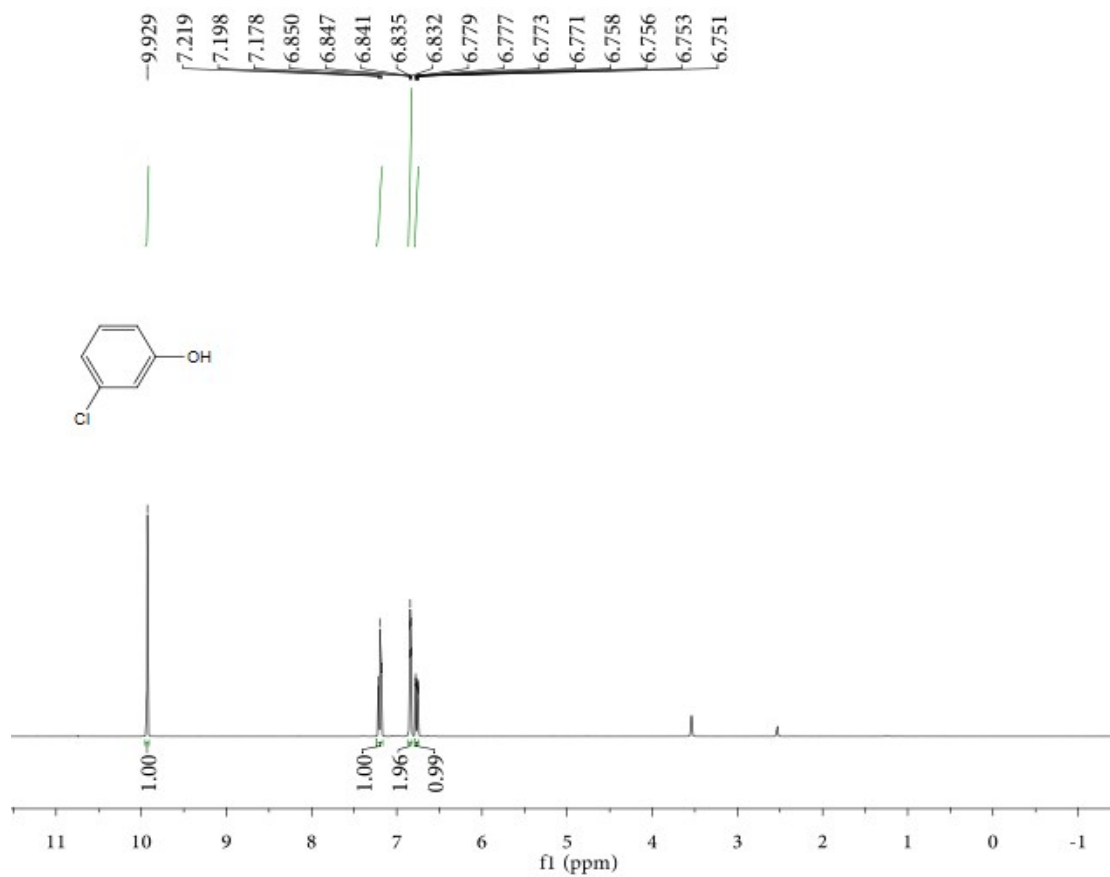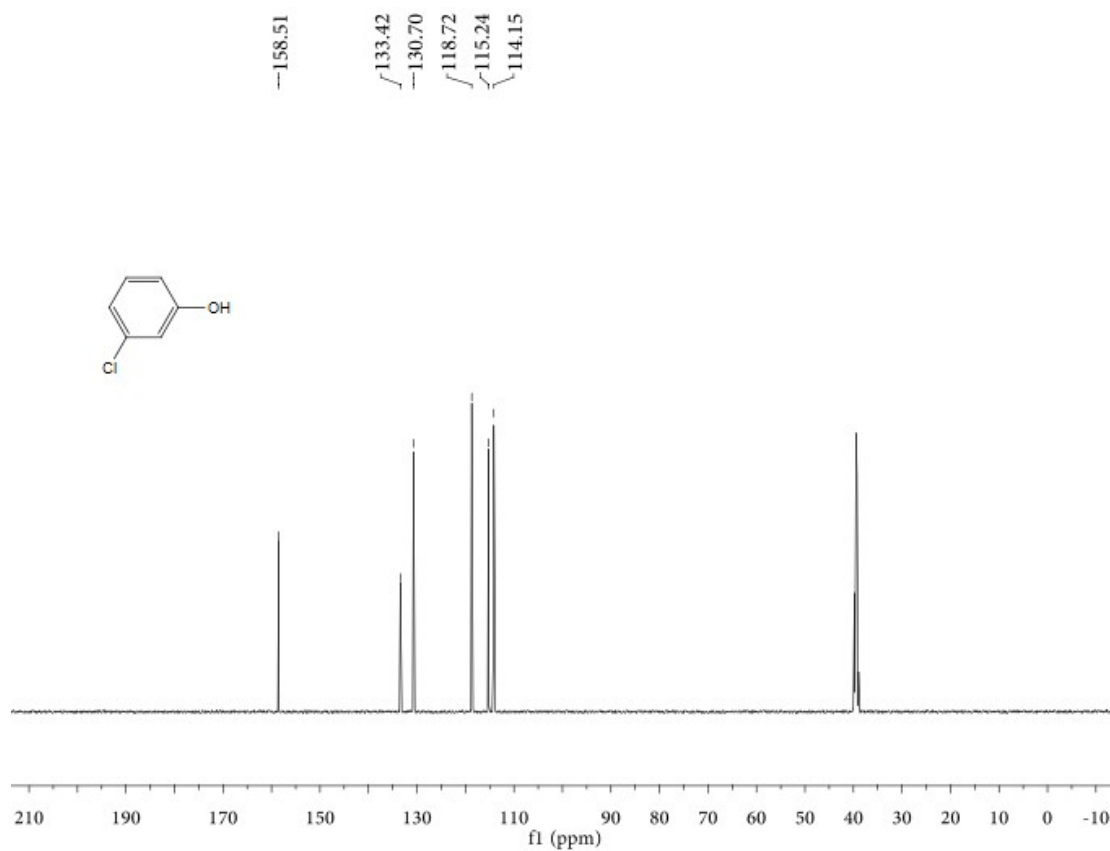

**Figure S25.** <sup>1</sup>H NMR of **23b** (400 MHz, DMSO-*d*<sub>6</sub>) and <sup>13</sup>C NMR of **23b** (125 MHz, DMSO-*d*<sub>6</sub>)

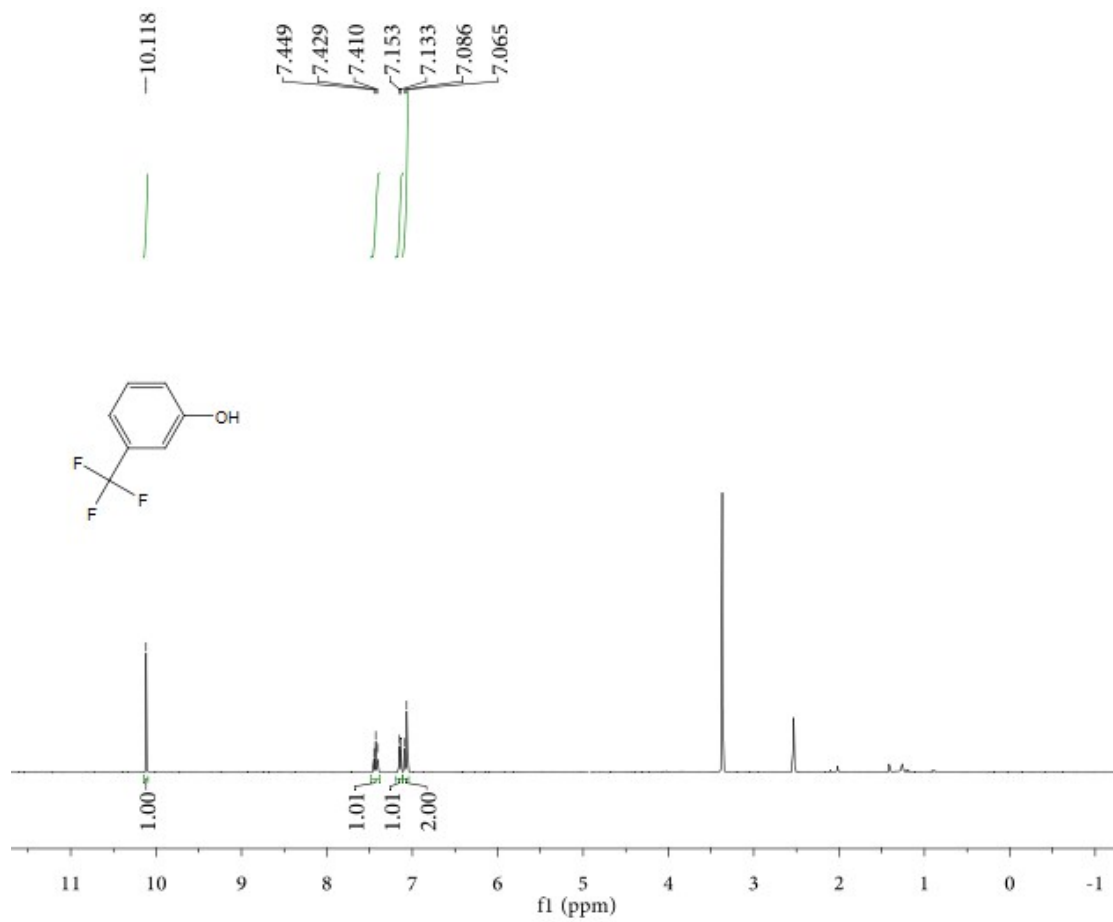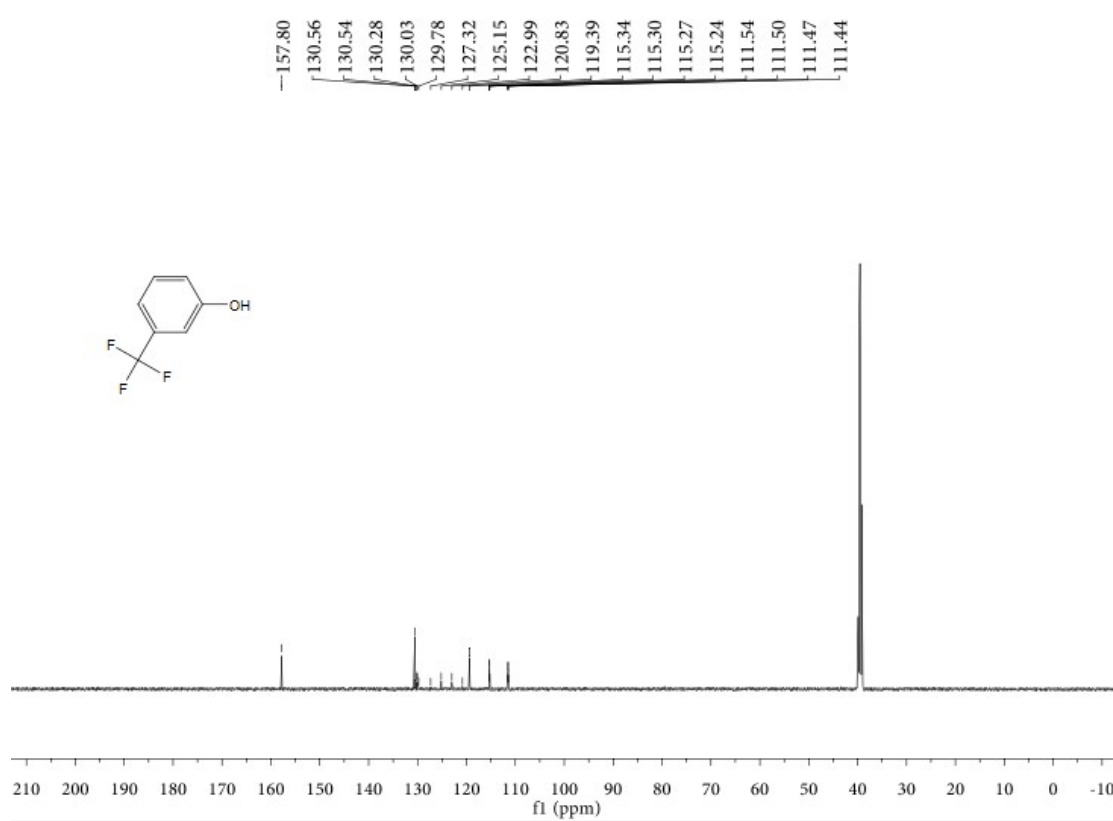

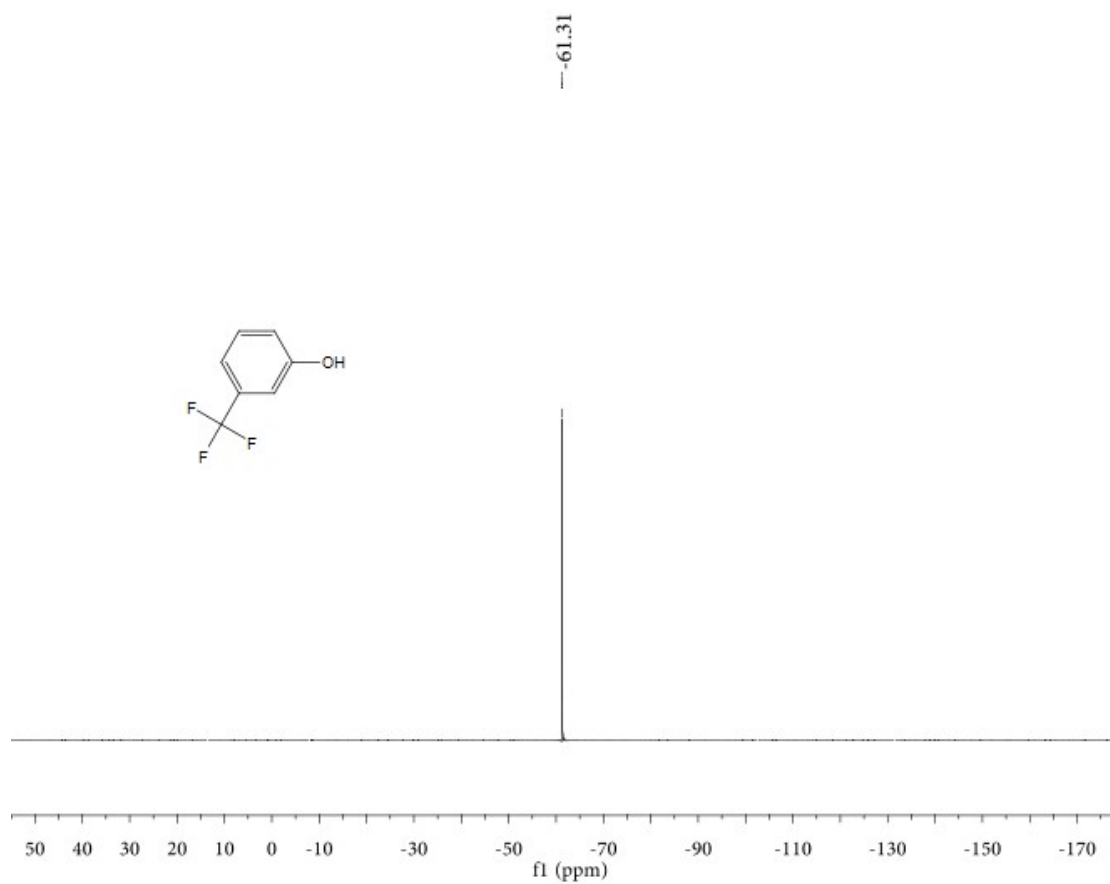

**Figure S26.**  $^1\text{H}$  NMR of **24b** (400 MHz,  $\text{DMSO-}d_6$ ) and  $^{13}\text{C}$  NMR of **24b** (125 MHz,  $\text{DMSO-}d_6$ ) and  $^{19}\text{F}$  NMR of **24b** (470 MHz,  $\text{DMSO-}d_6$ )



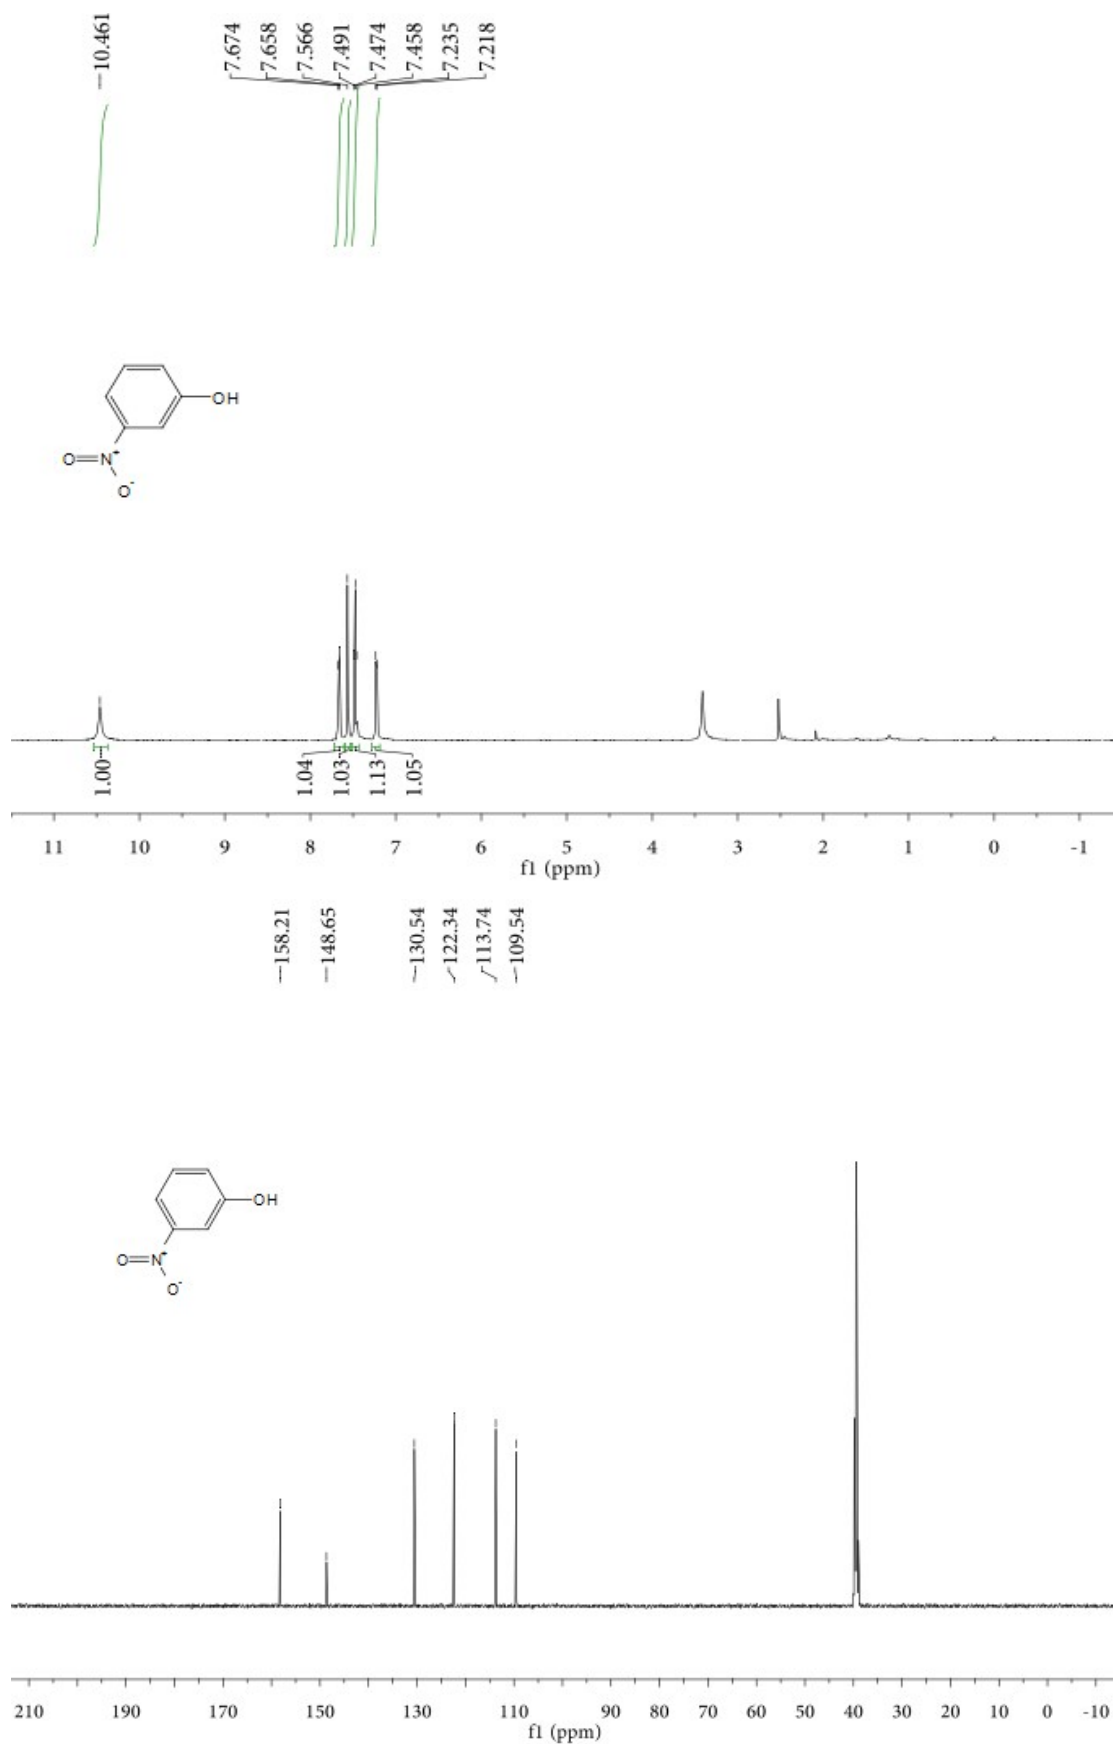

**Figure S27.** <sup>1</sup>H NMR of **25b** (500 MHz, DMSO-*d*<sub>6</sub>) and <sup>13</sup>C NMR of **25b** (125 MHz, DMSO-*d*<sub>6</sub>)

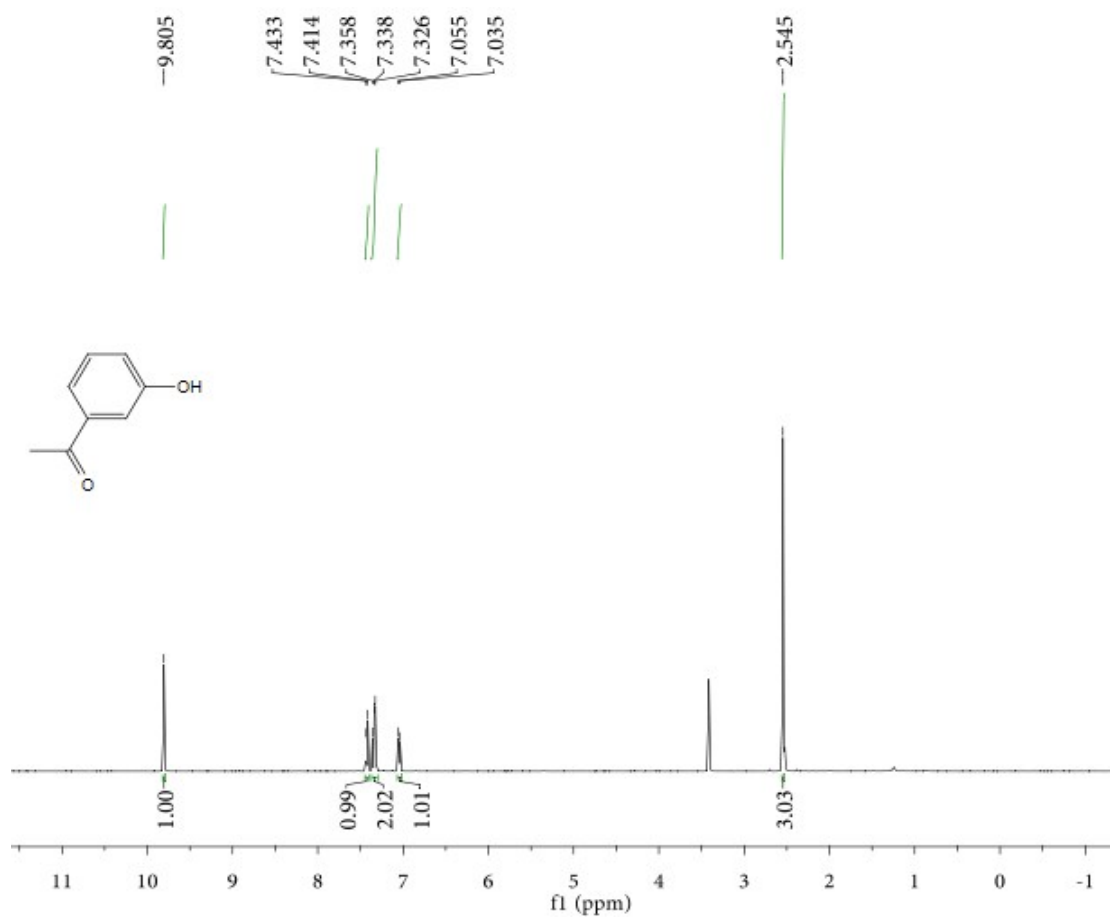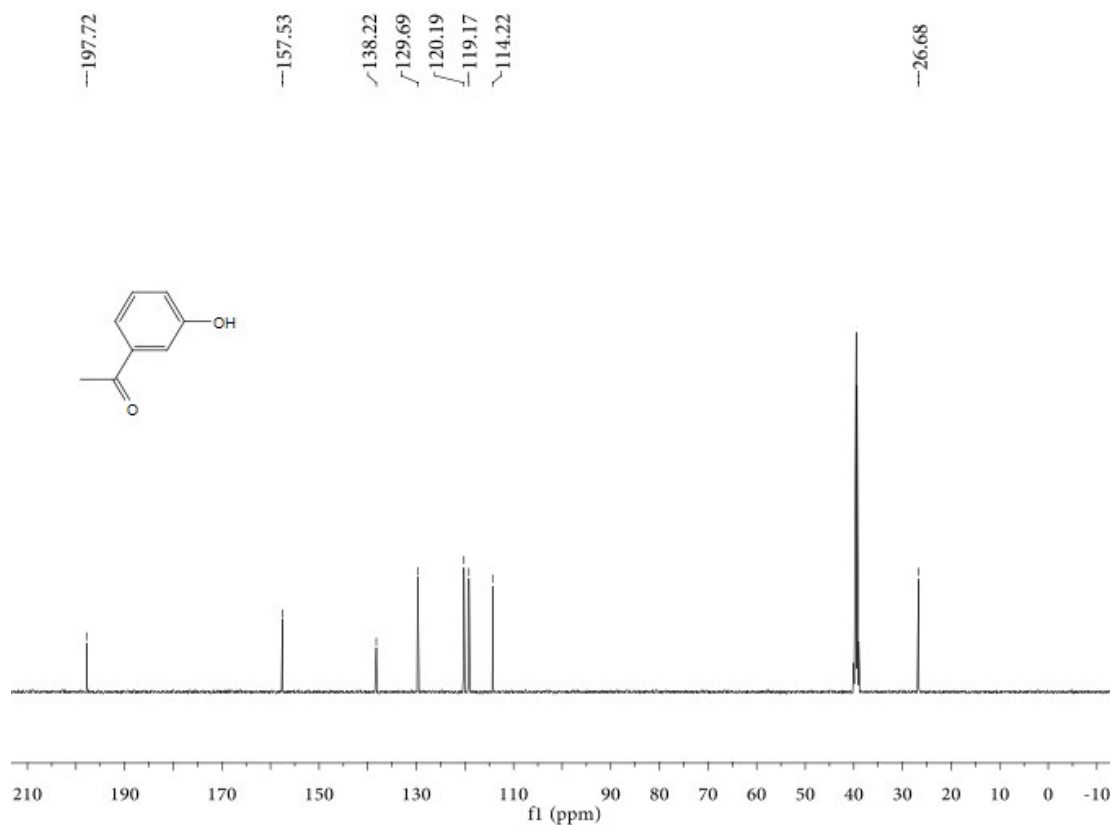

**Figure S28.** <sup>1</sup>H NMR of **26b** (400 MHz, DMSO-*d*<sub>6</sub>) and <sup>13</sup>C NMR of **26b** (125 MHz, DMSO-*d*<sub>6</sub>)

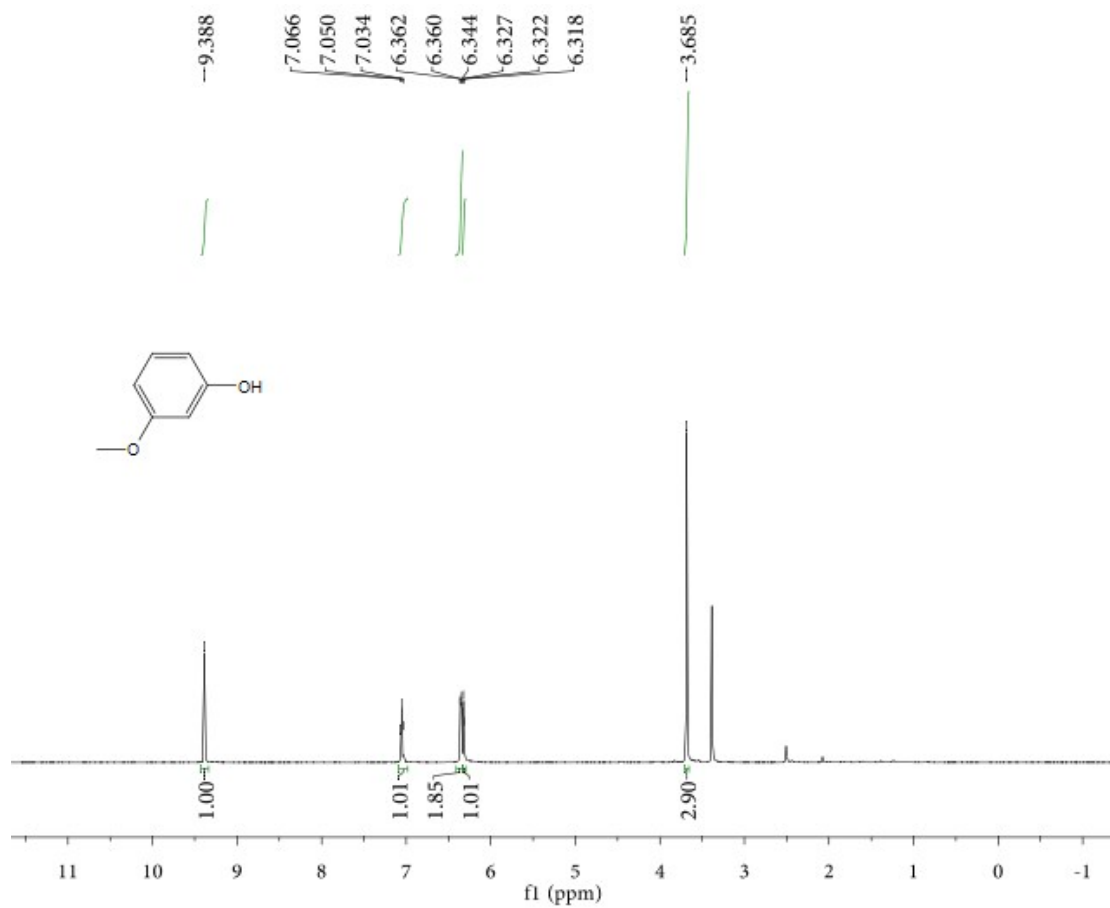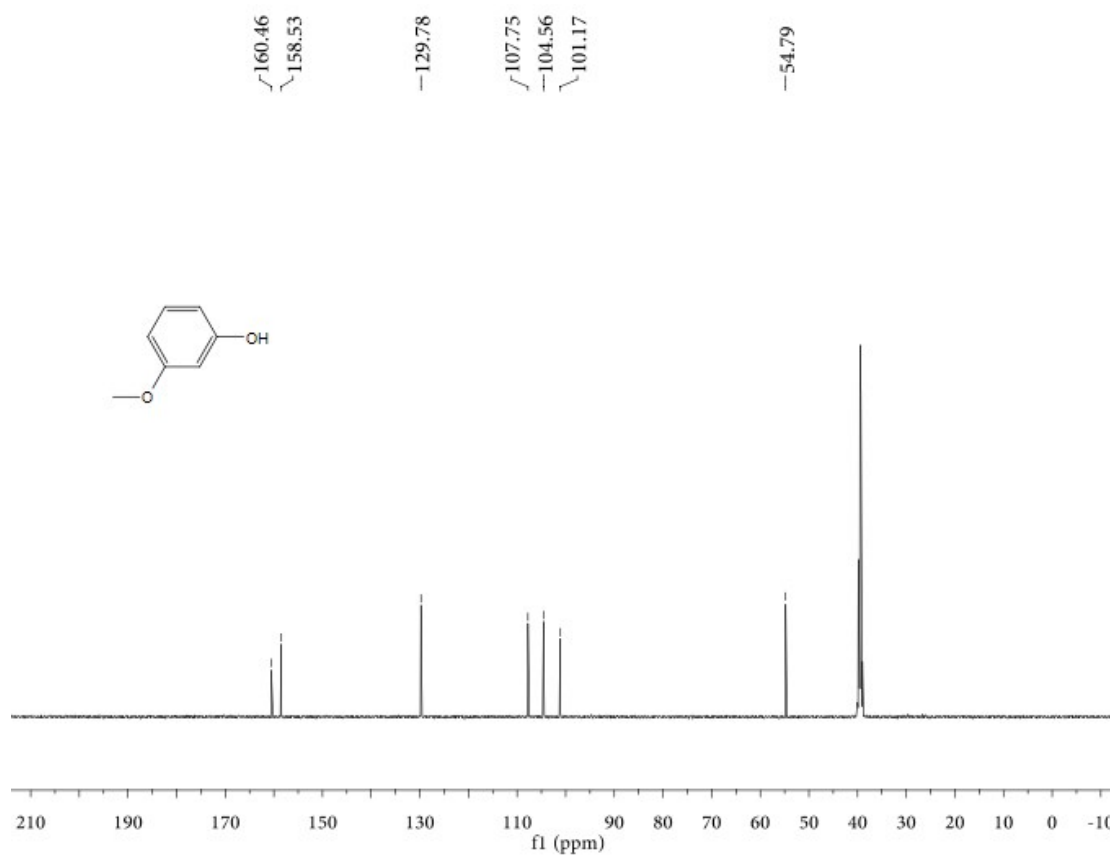

**Figure S29.** <sup>1</sup>H NMR of **27b** (400 MHz, DMSO-*d*<sub>6</sub>) and <sup>13</sup>C NMR of **27b** (125 MHz, DMSO-*d*<sub>6</sub>)

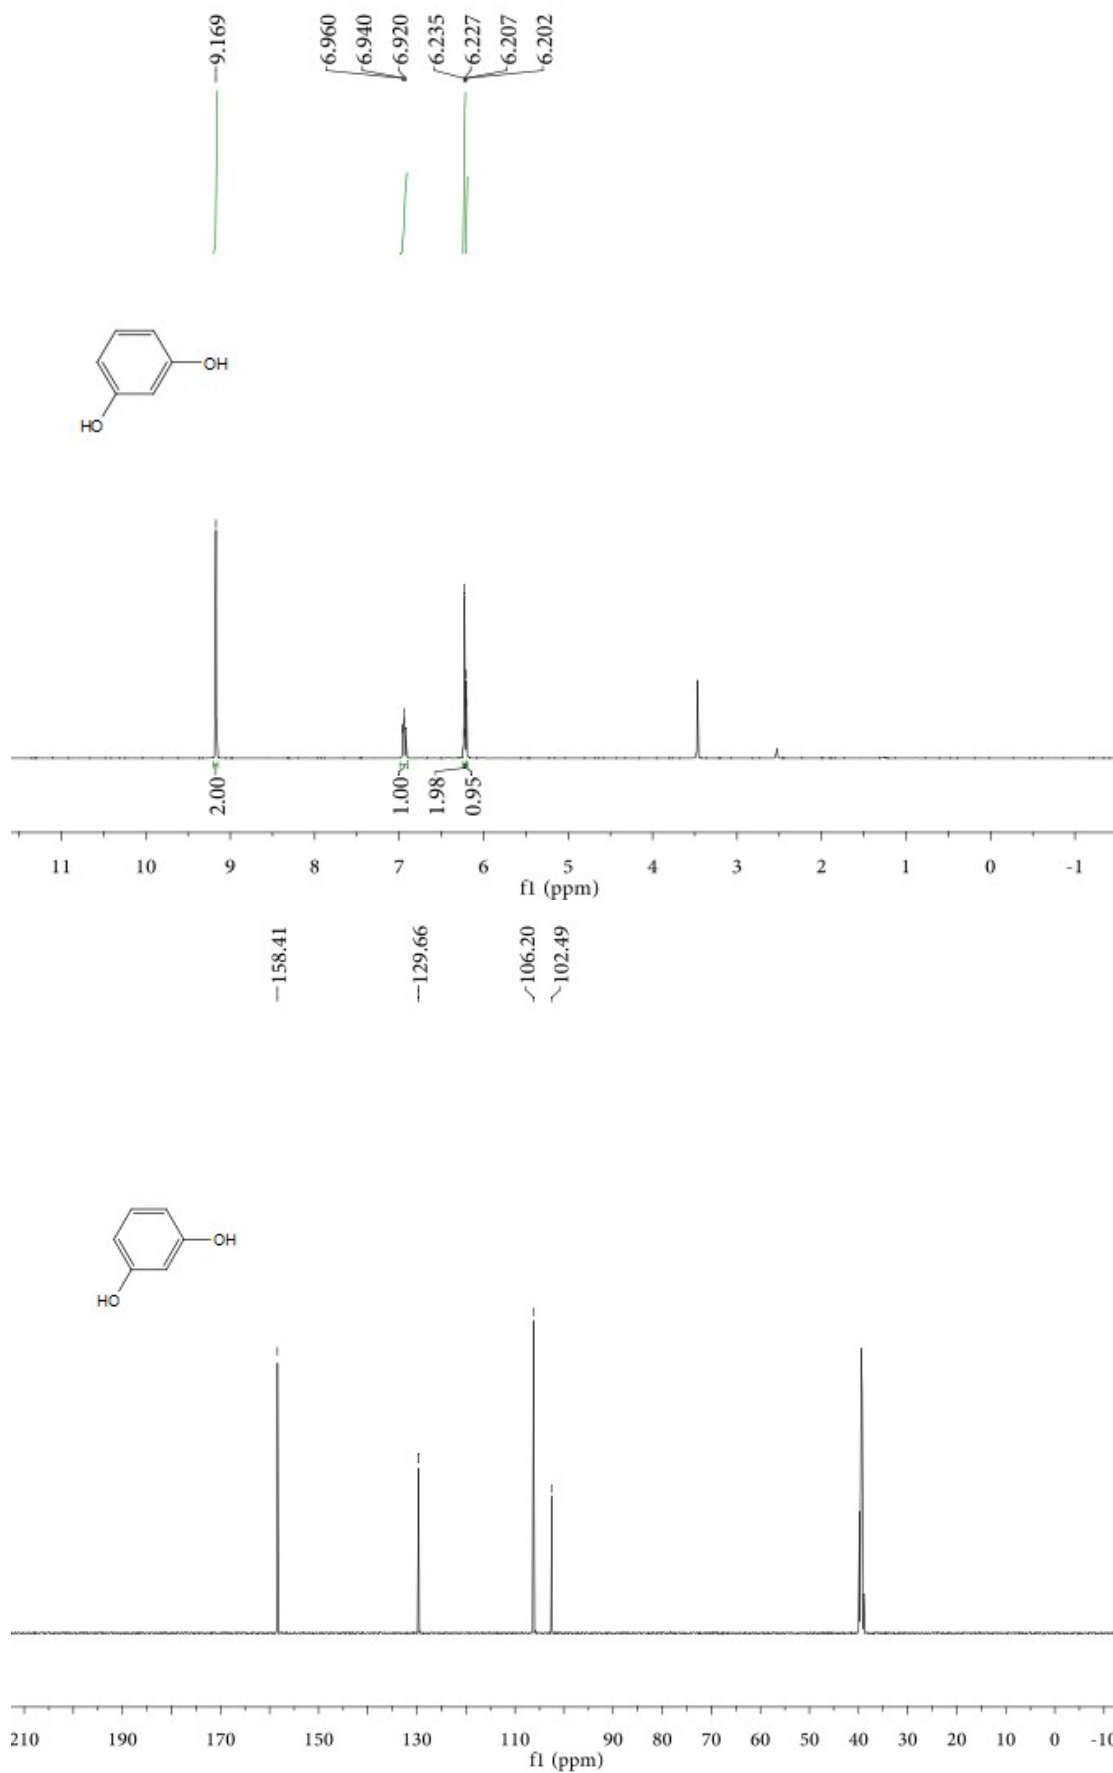

**Figure S30.** <sup>1</sup>H NMR of **28b** (400 MHz, DMSO-*d*<sub>6</sub>) and <sup>13</sup>C NMR of **28b** (125 MHz, DMSO-*d*<sub>6</sub>)

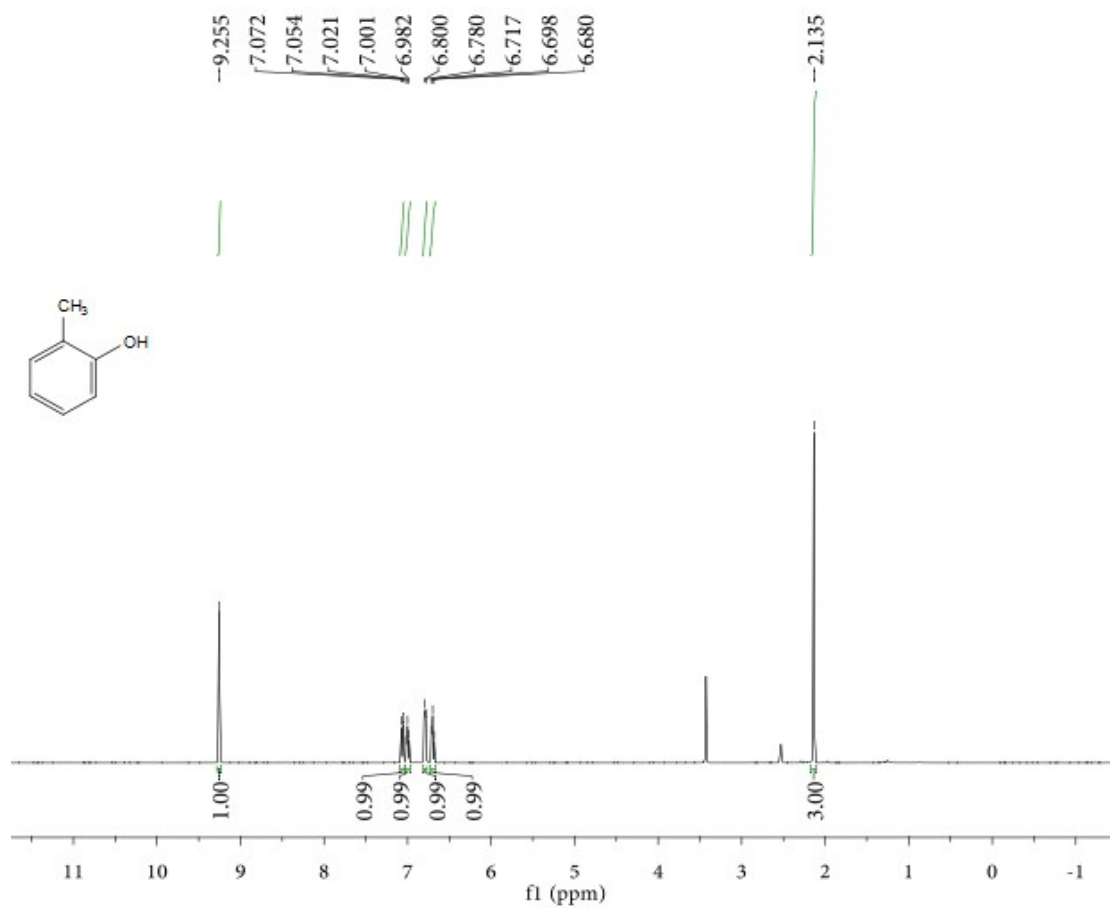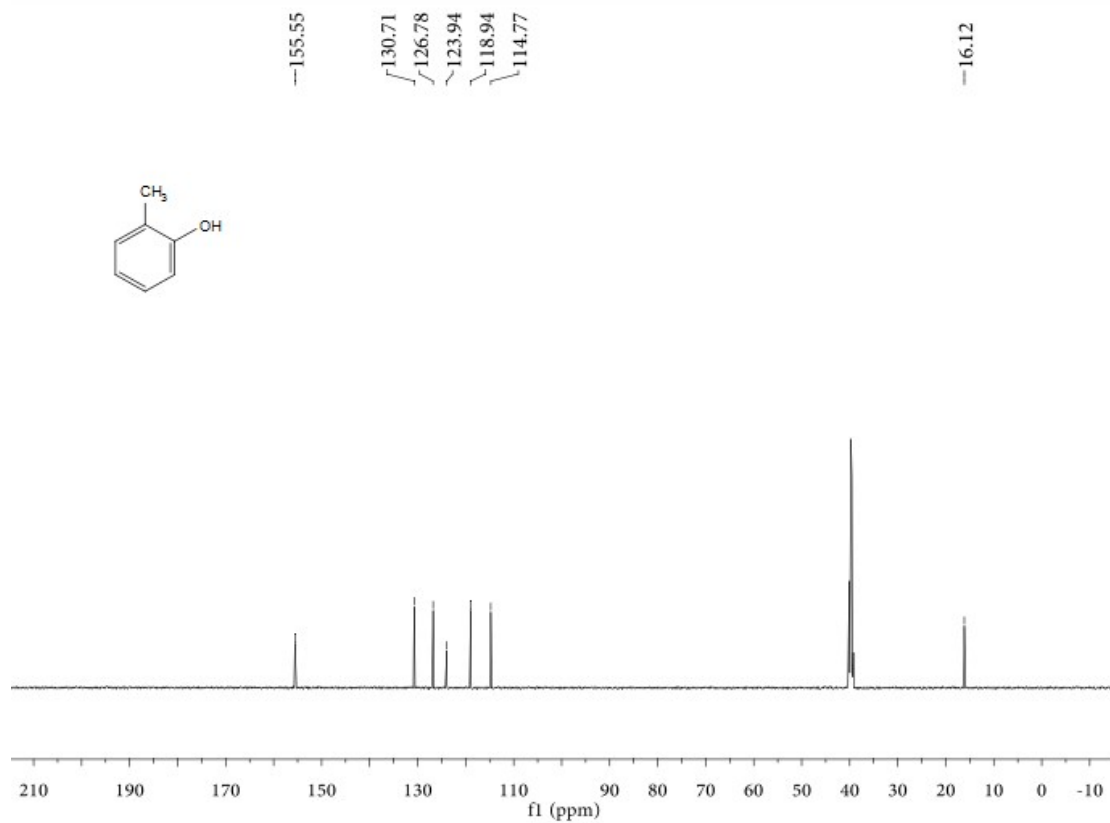

**Figure S31.** <sup>1</sup>H NMR of **29b** (400 MHz, DMSO-*d*<sub>6</sub>) and <sup>13</sup>C NMR of **29b** (125 MHz, DMSO-*d*<sub>6</sub>)

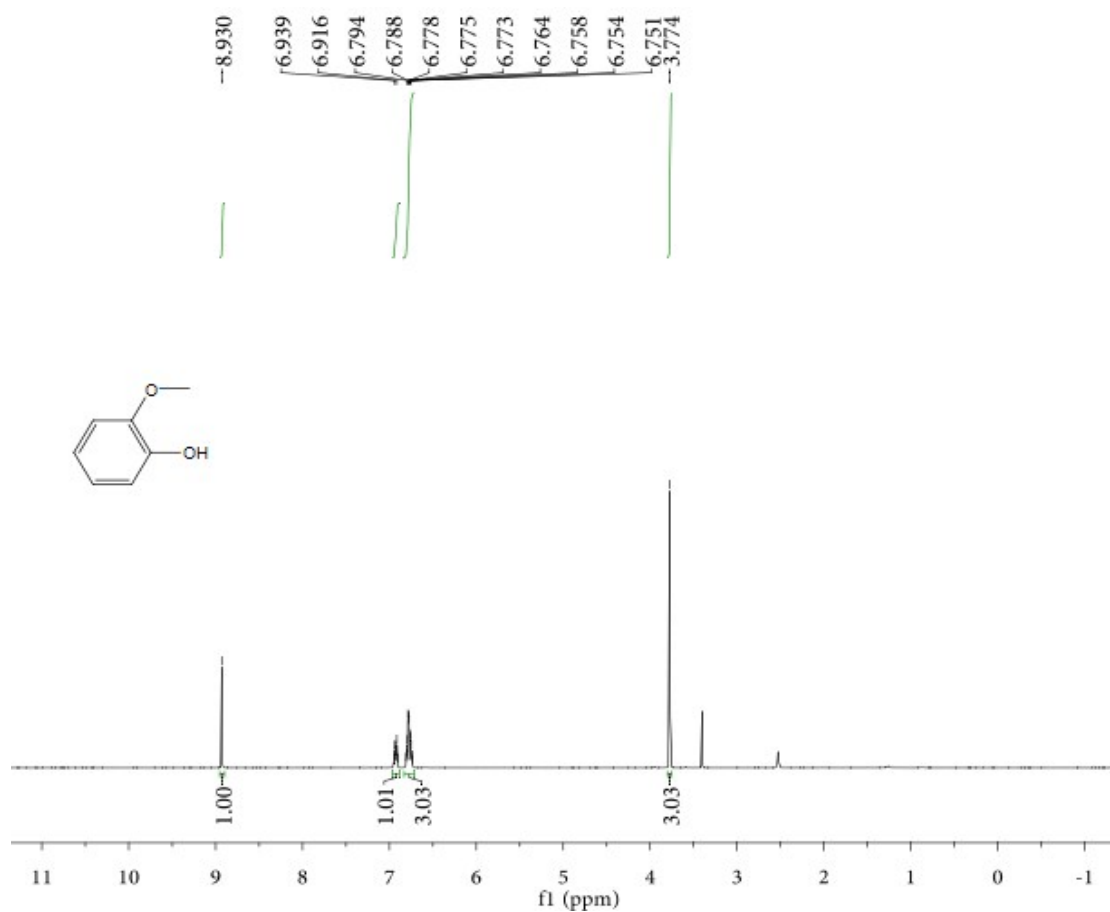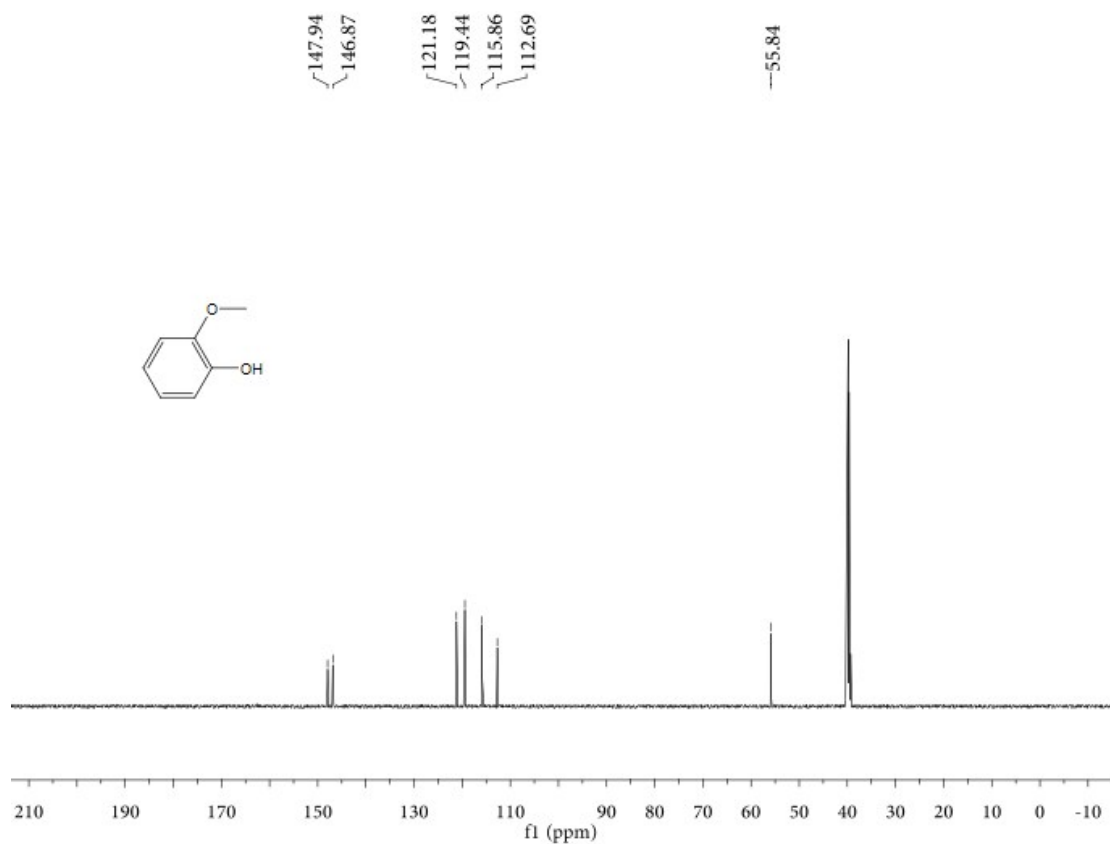

**Figure S32.**  $^1\text{H}$  NMR of **30b** (400 MHz,  $\text{DMSO-}d_6$ ) and  $^{13}\text{C}$  NMR of **30b** (125 MHz,  $\text{DMSO-}d_6$ )

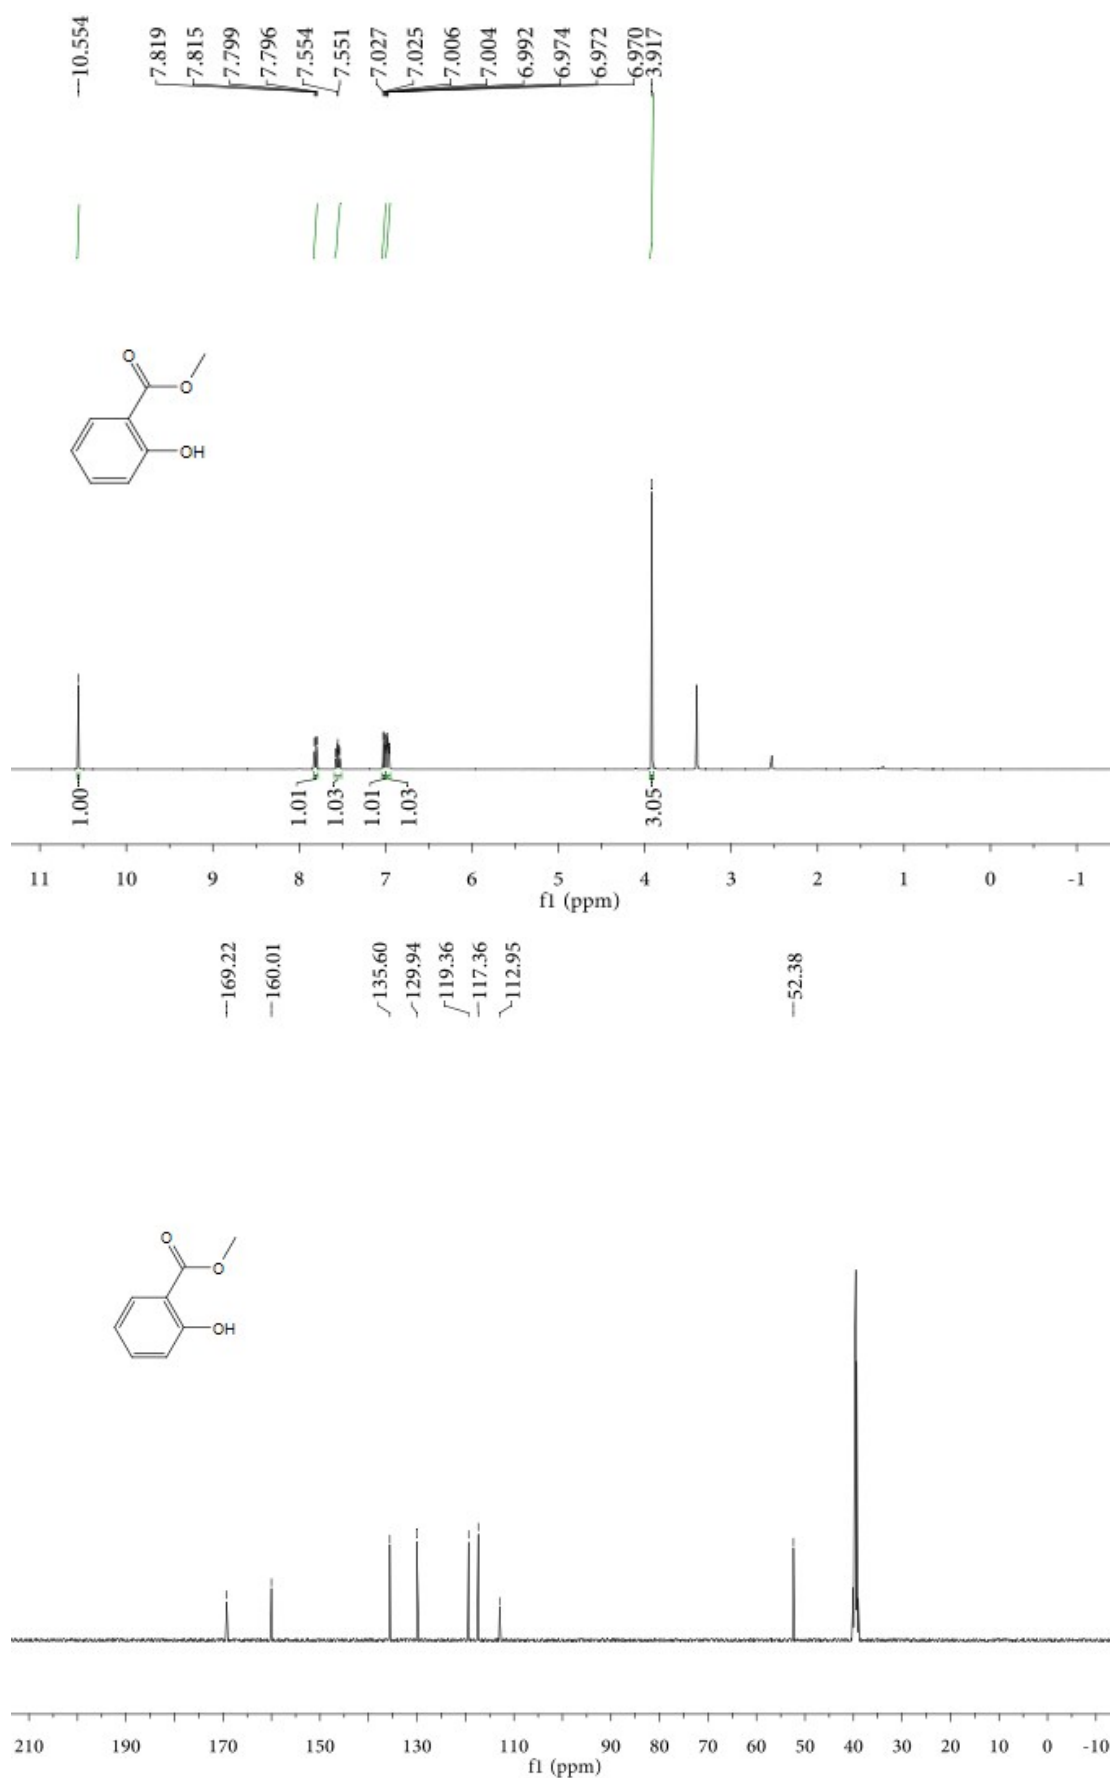

**Figure S33.** <sup>1</sup>H NMR of **31b** (400 MHz, DMSO-*d*<sub>6</sub>) and <sup>13</sup>C NMR of **31b** (125 MHz, DMSO-*d*<sub>6</sub>)

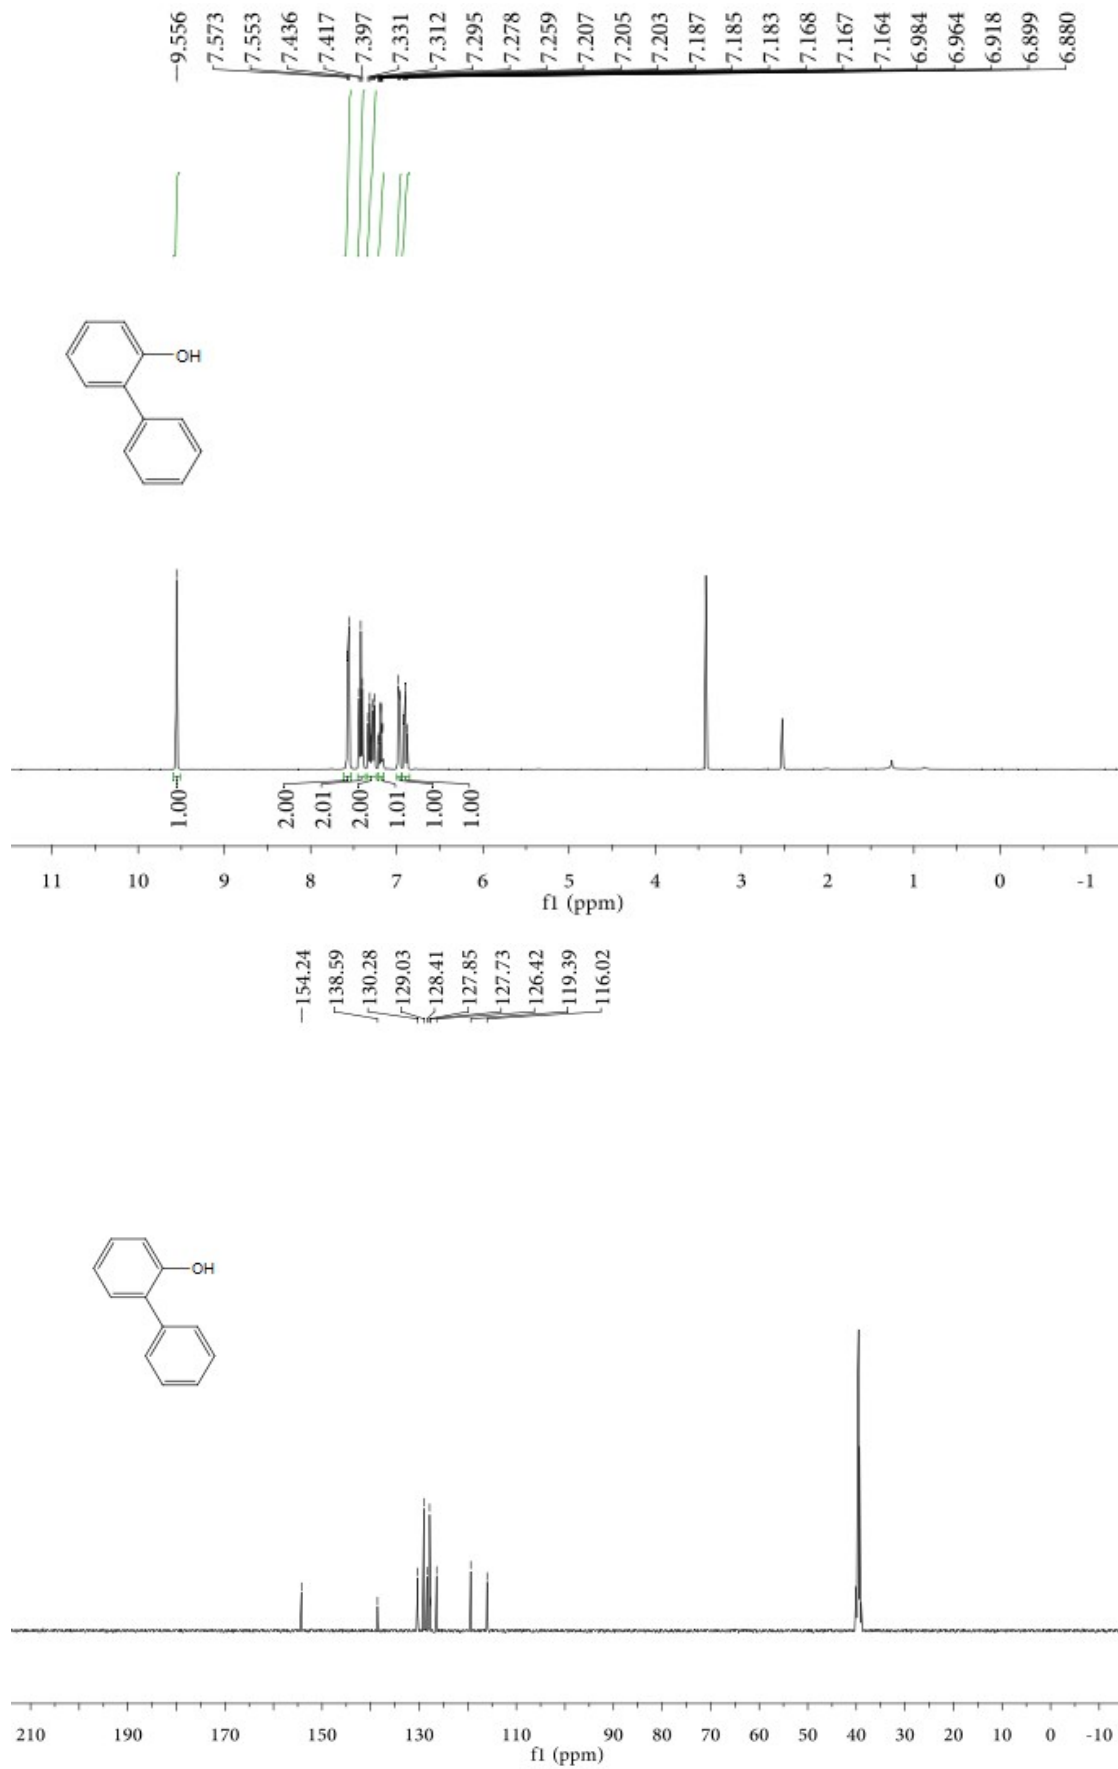

**Figure S34.** <sup>1</sup>H NMR of **32b** (400 MHz, DMSO-*d*<sub>6</sub>) and <sup>13</sup>C NMR of **32b** (125 MHz, DMSO-*d*<sub>6</sub>)



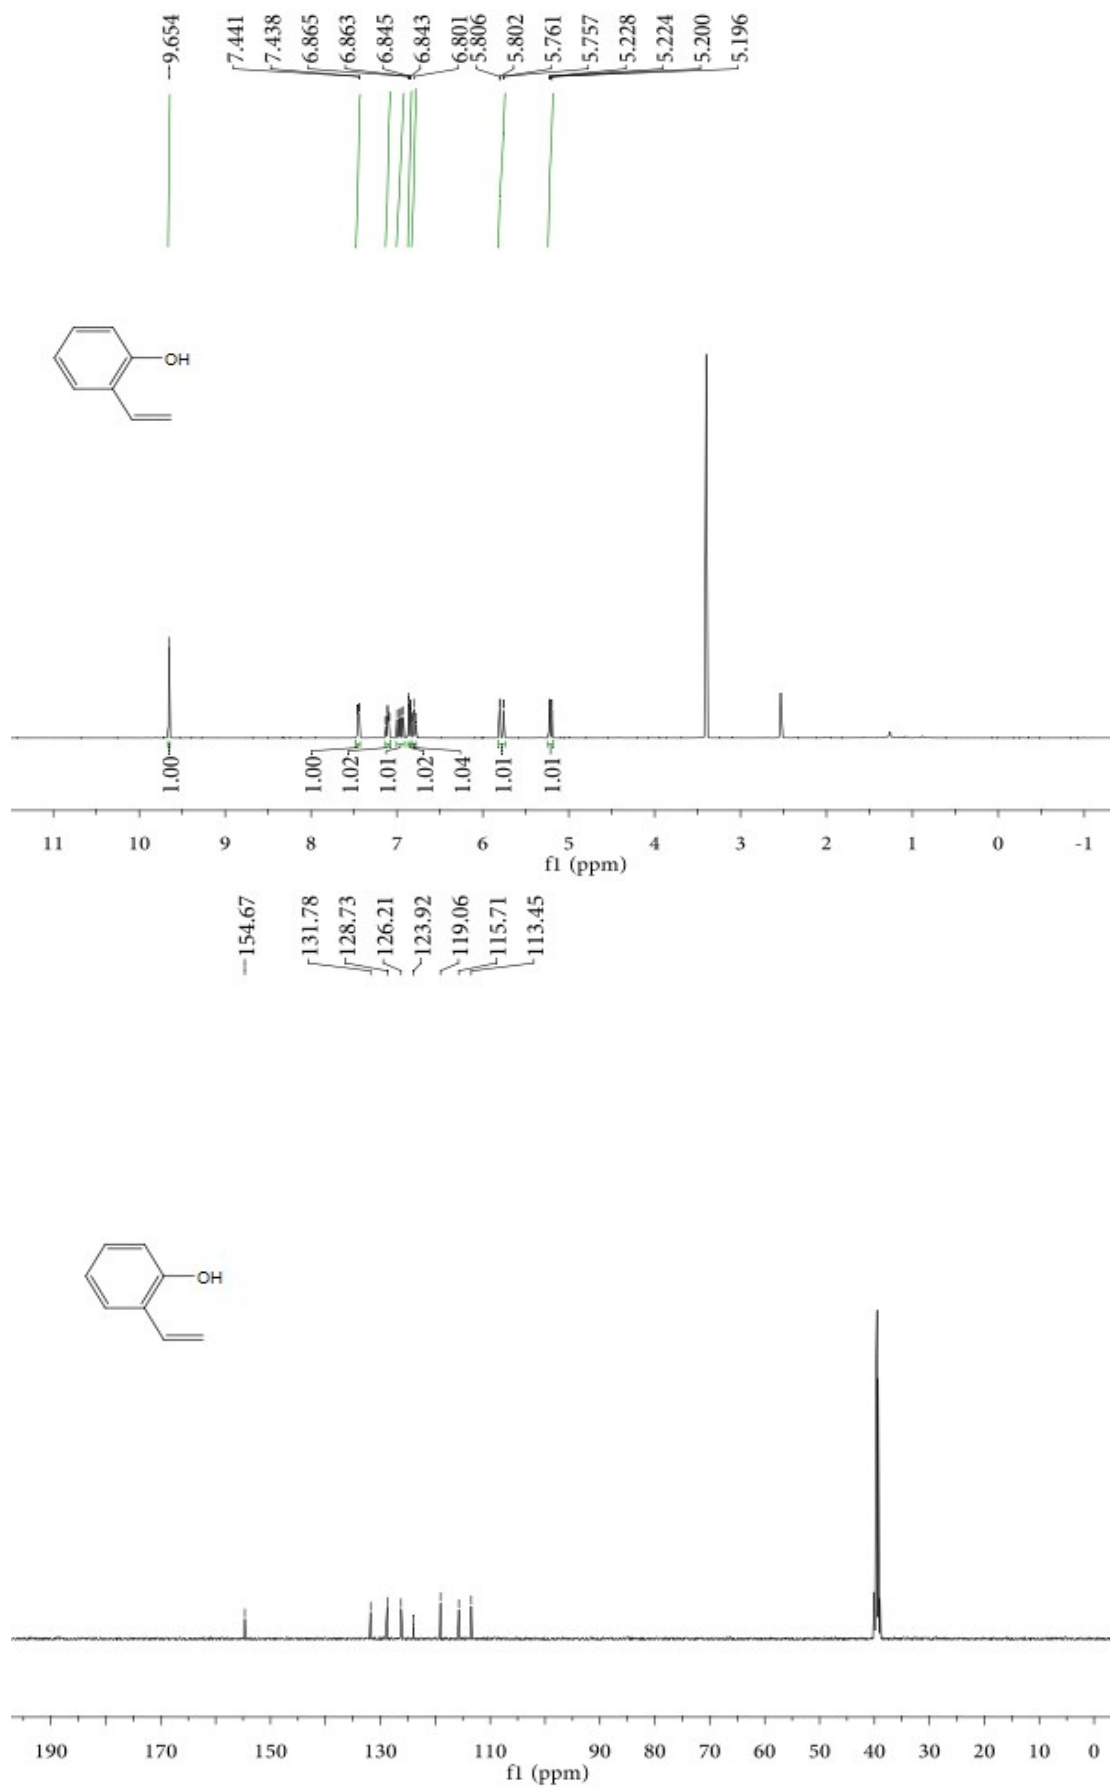

**Figure S35.** <sup>1</sup>H NMR of **33b** (400 MHz, DMSO-*d*<sub>6</sub>) and <sup>13</sup>C NMR of **33b** (125 MHz, DMSO-*d*<sub>6</sub>)

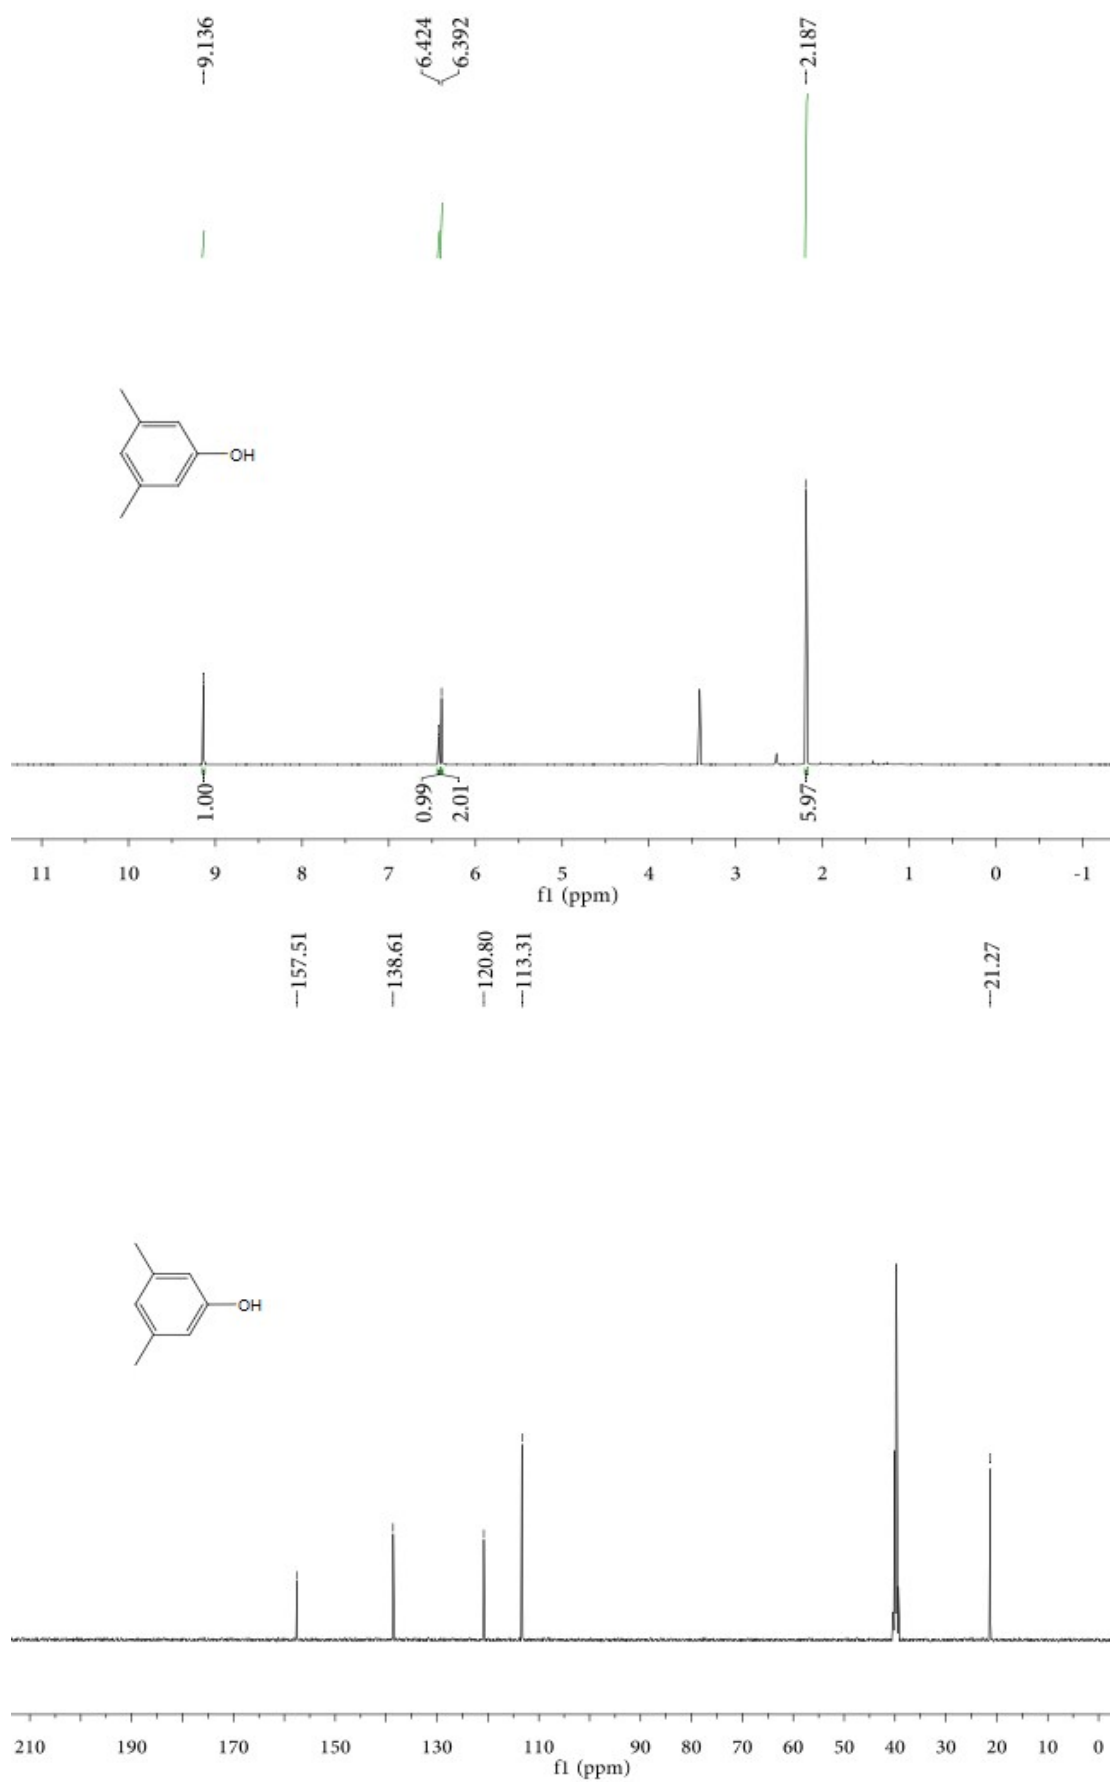

**Figure S36.** <sup>1</sup>H NMR of **34b** (400 MHz, DMSO-*d*<sub>6</sub>) and <sup>13</sup>C NMR of **34b** (125 MHz, DMSO-*d*<sub>6</sub>)

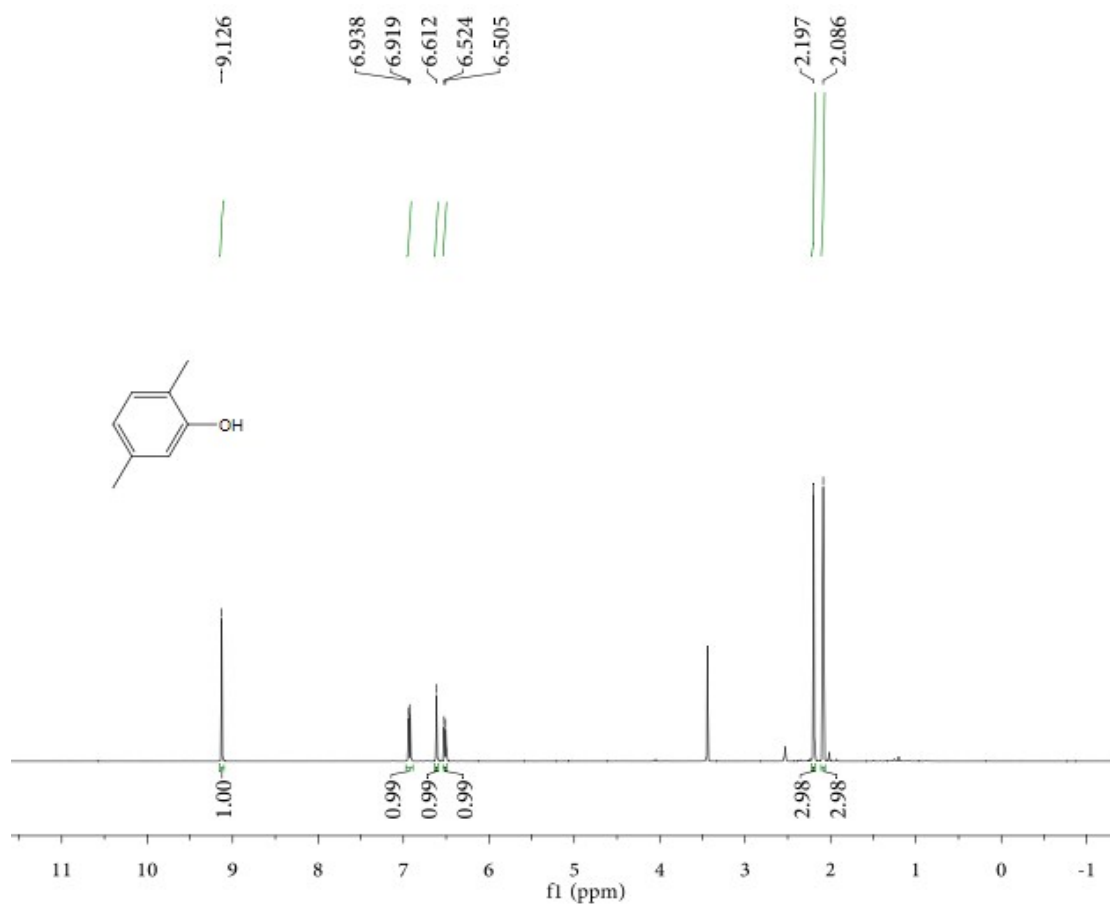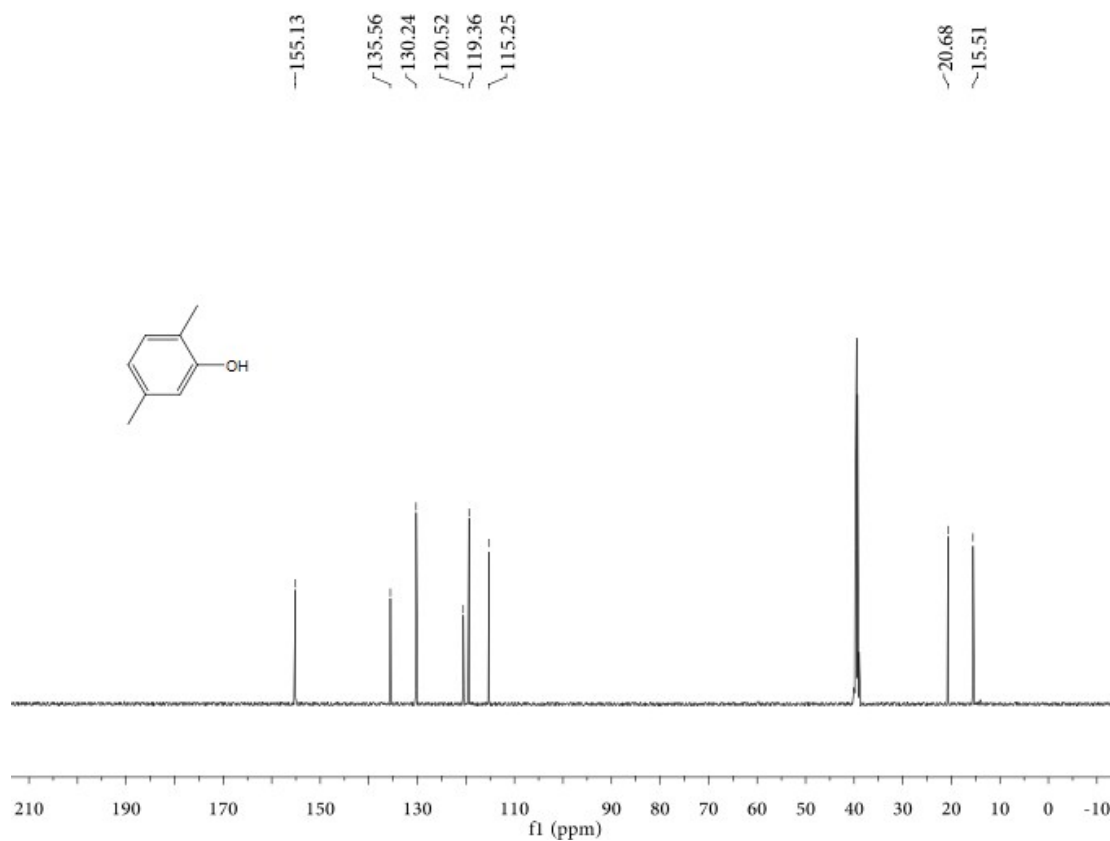

**Figure S37.**  $^1\text{H}$  NMR of **35b** (400 MHz,  $\text{DMSO-}d_6$ ) and  $^{13}\text{C}$  NMR of **35b** (125 MHz,  $\text{DMSO-}d_6$ )

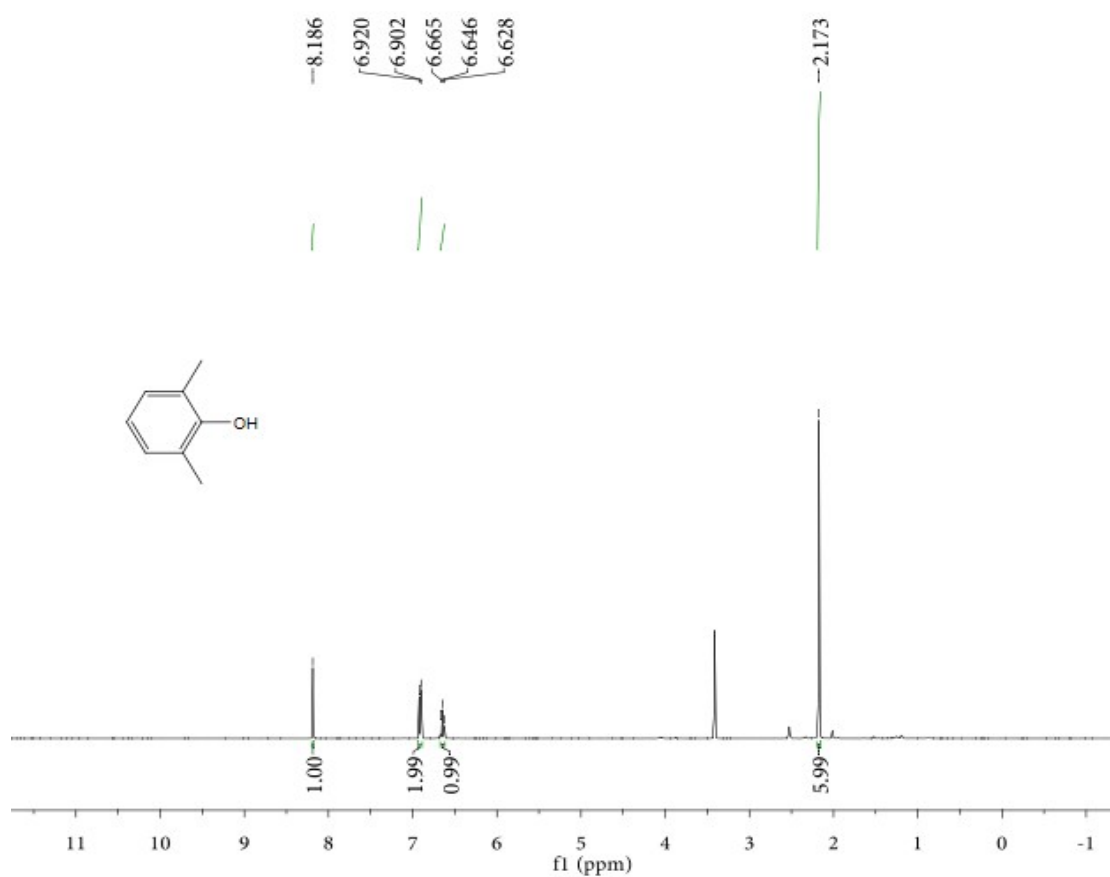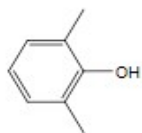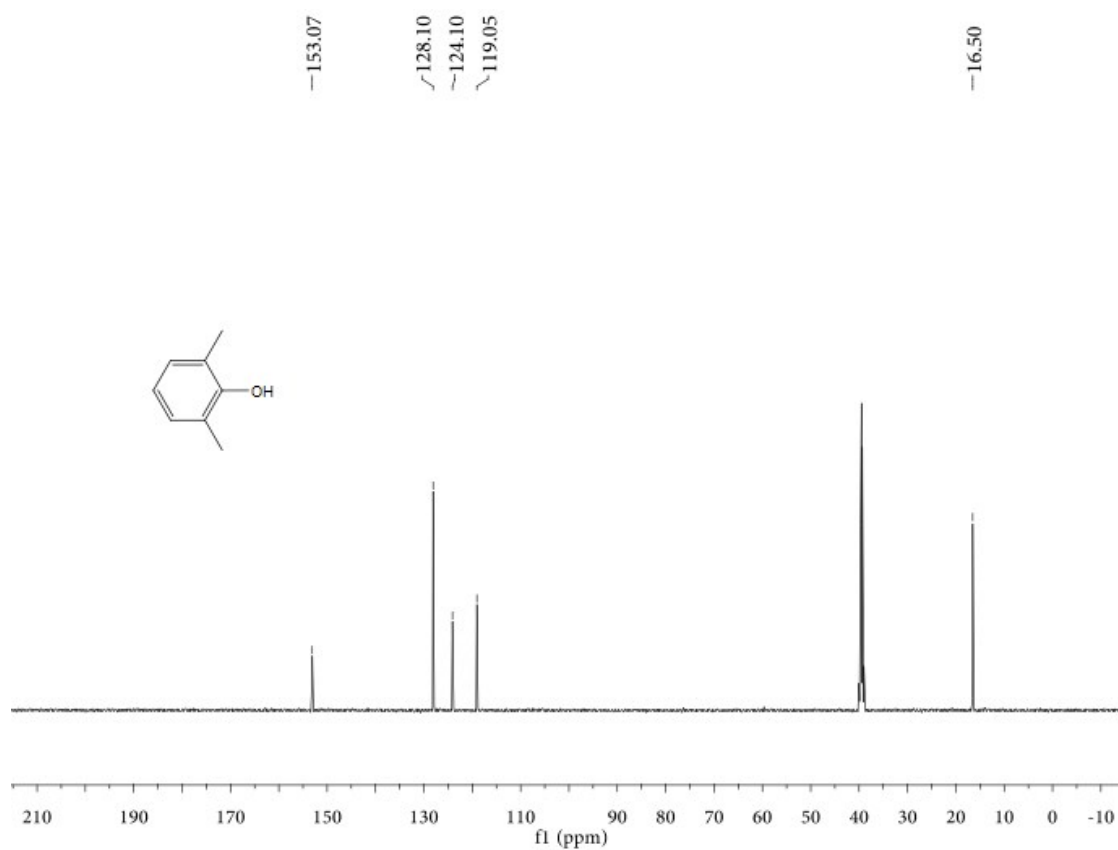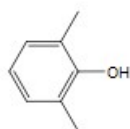

**Figure S38.** <sup>1</sup>H NMR of **36b** (400 MHz, DMSO-*d*<sub>6</sub>) and <sup>13</sup>C NMR of **36b** (125 MHz, DMSO-*d*<sub>6</sub>)

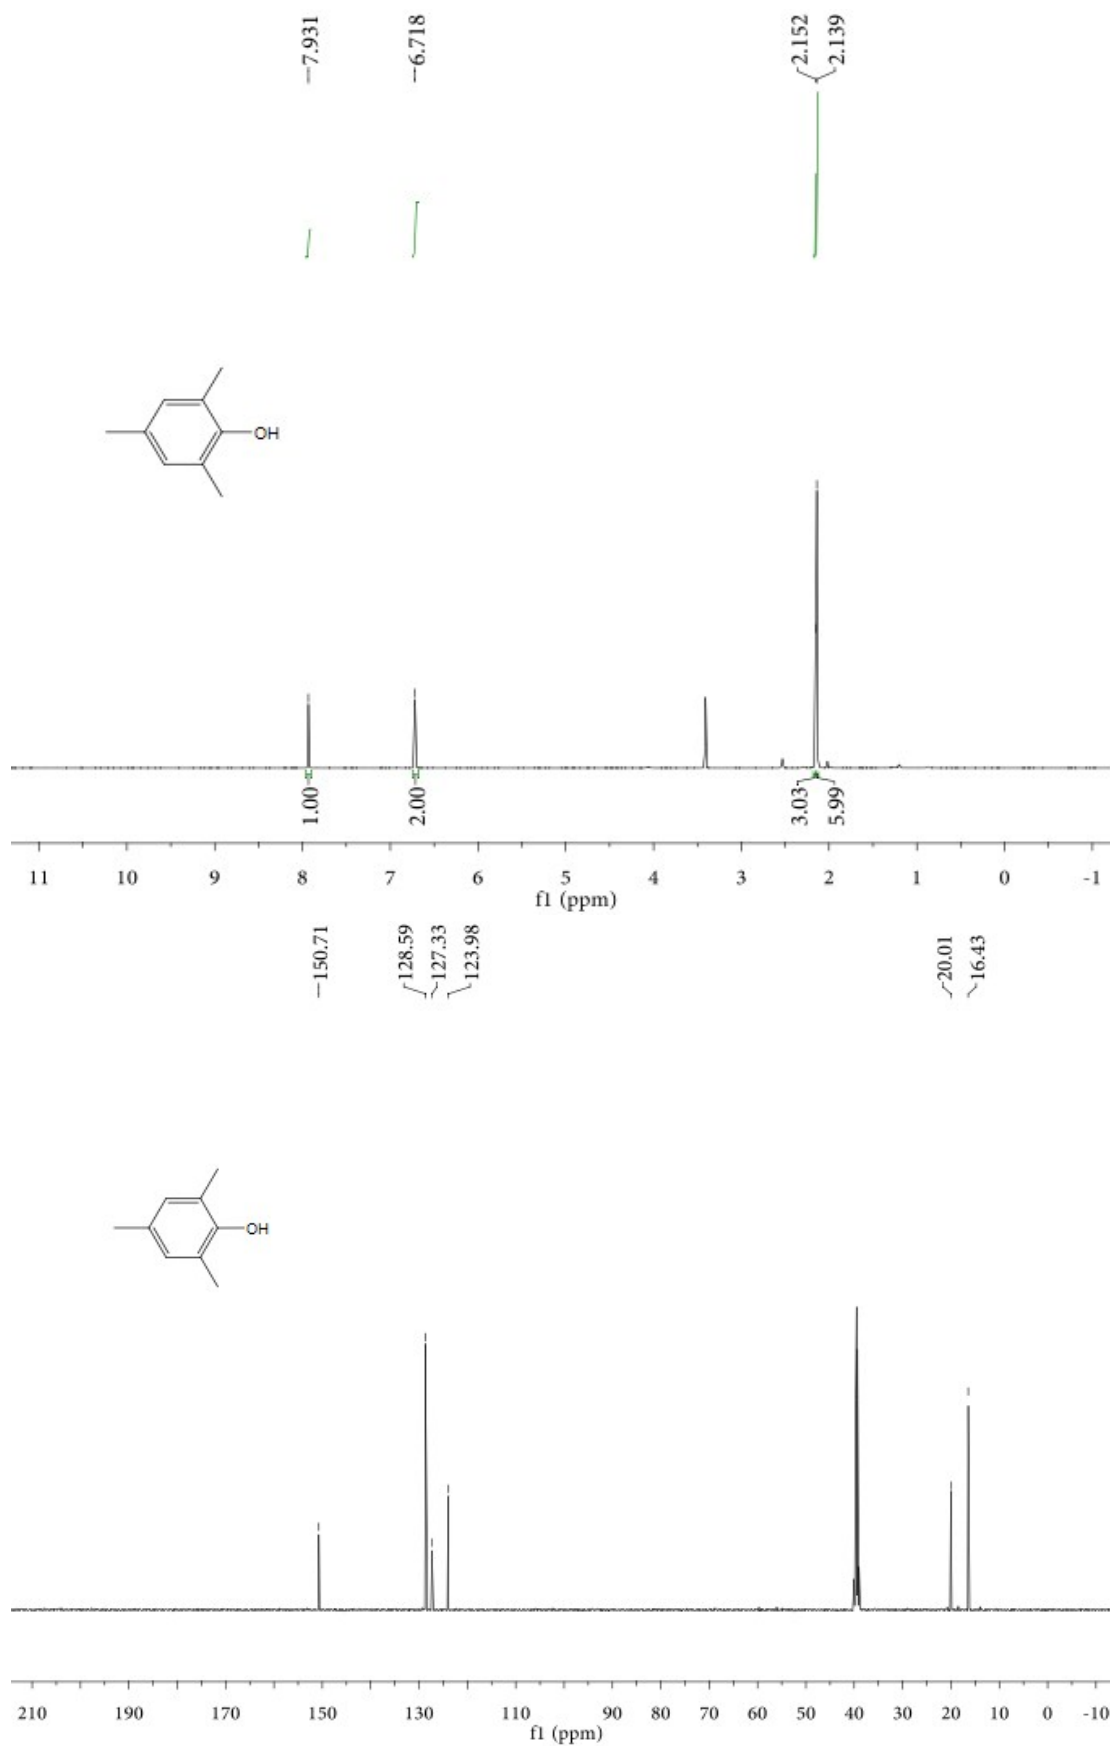

**Figure S39.** <sup>1</sup>H NMR of **37b** (400 MHz, DMSO-*d*<sub>6</sub>) and <sup>13</sup>C NMR of **37b** (125 MHz, DMSO-*d*<sub>6</sub>)

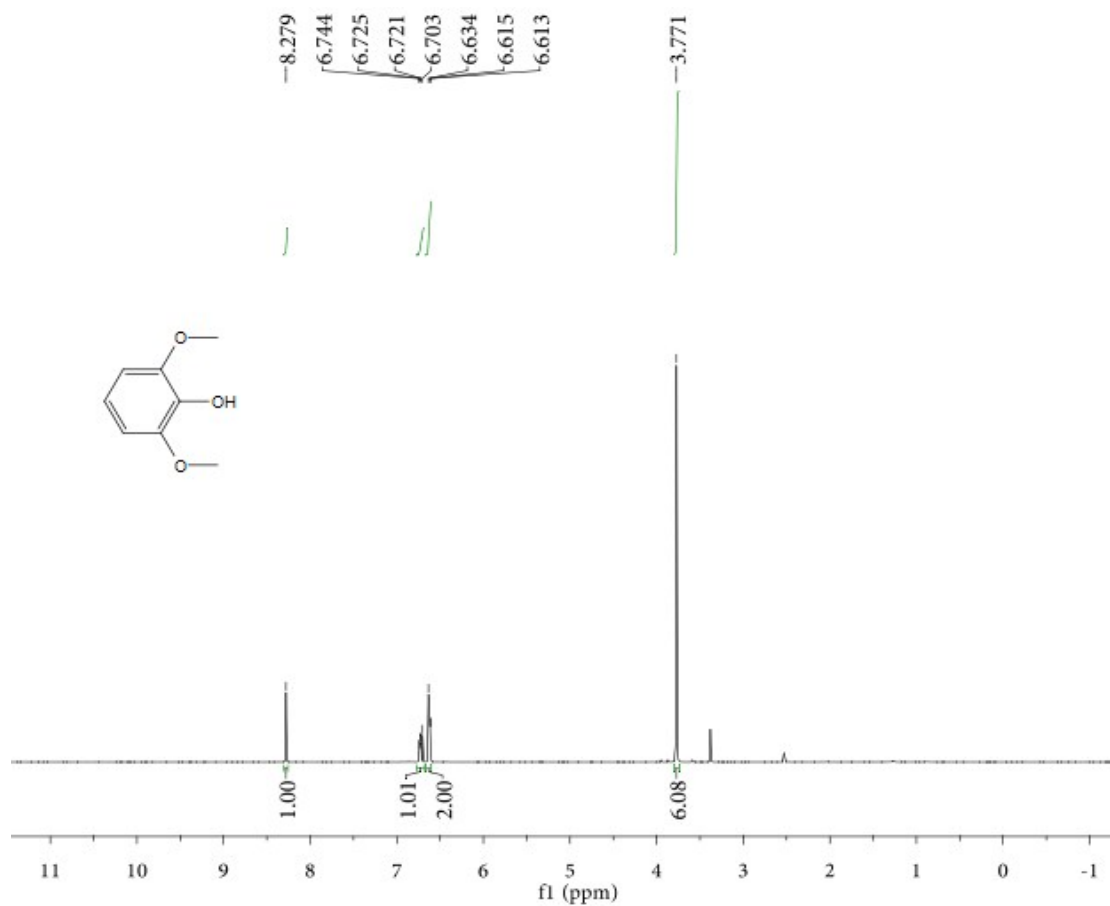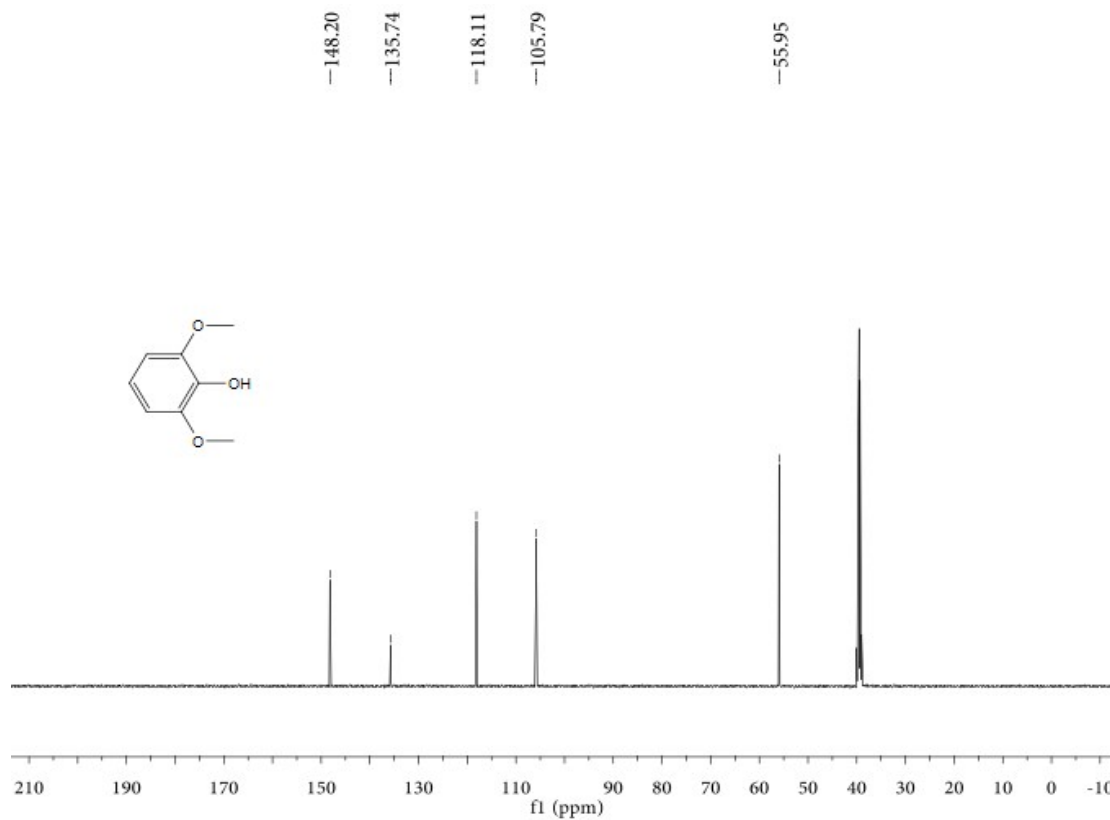

**Figure S40.** <sup>1</sup>H NMR of **38b** (400 MHz, DMSO-*d*<sub>6</sub>) and <sup>13</sup>C NMR of **38b** (125 MHz, DMSO-*d*<sub>6</sub>)

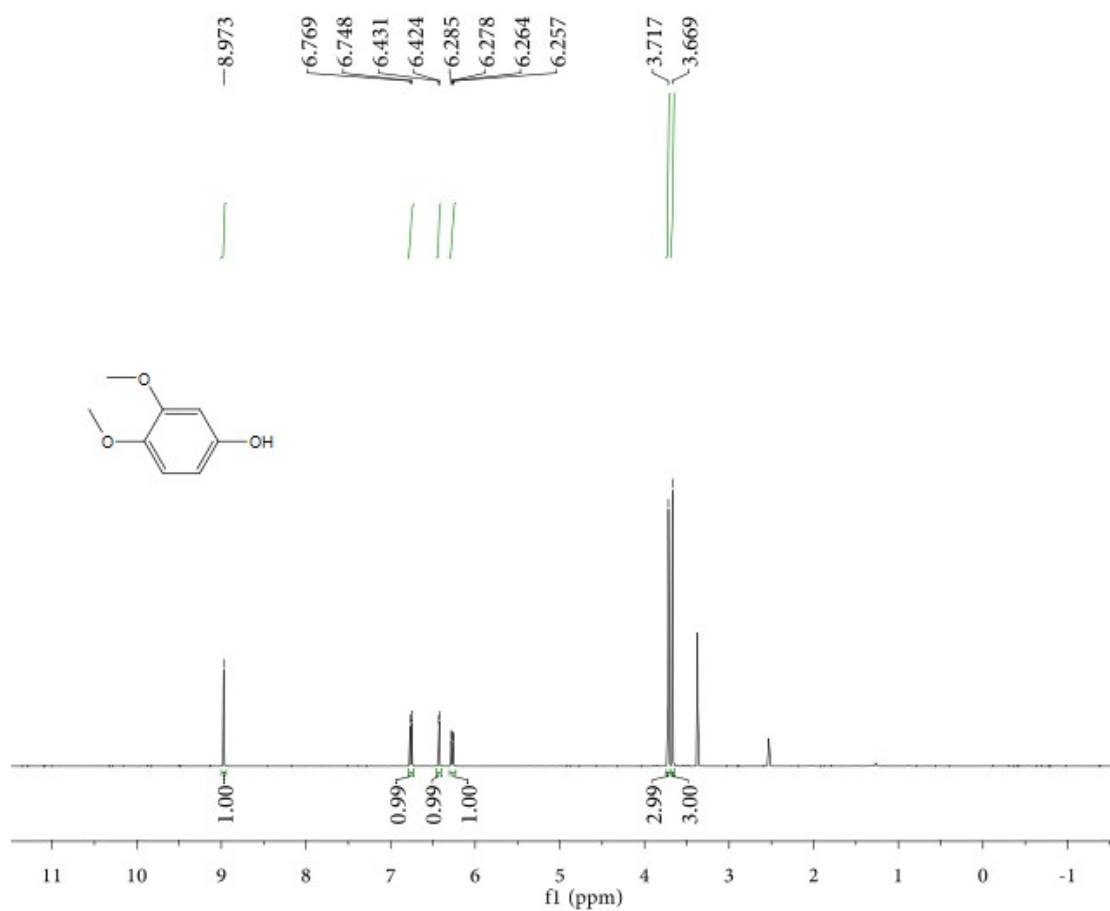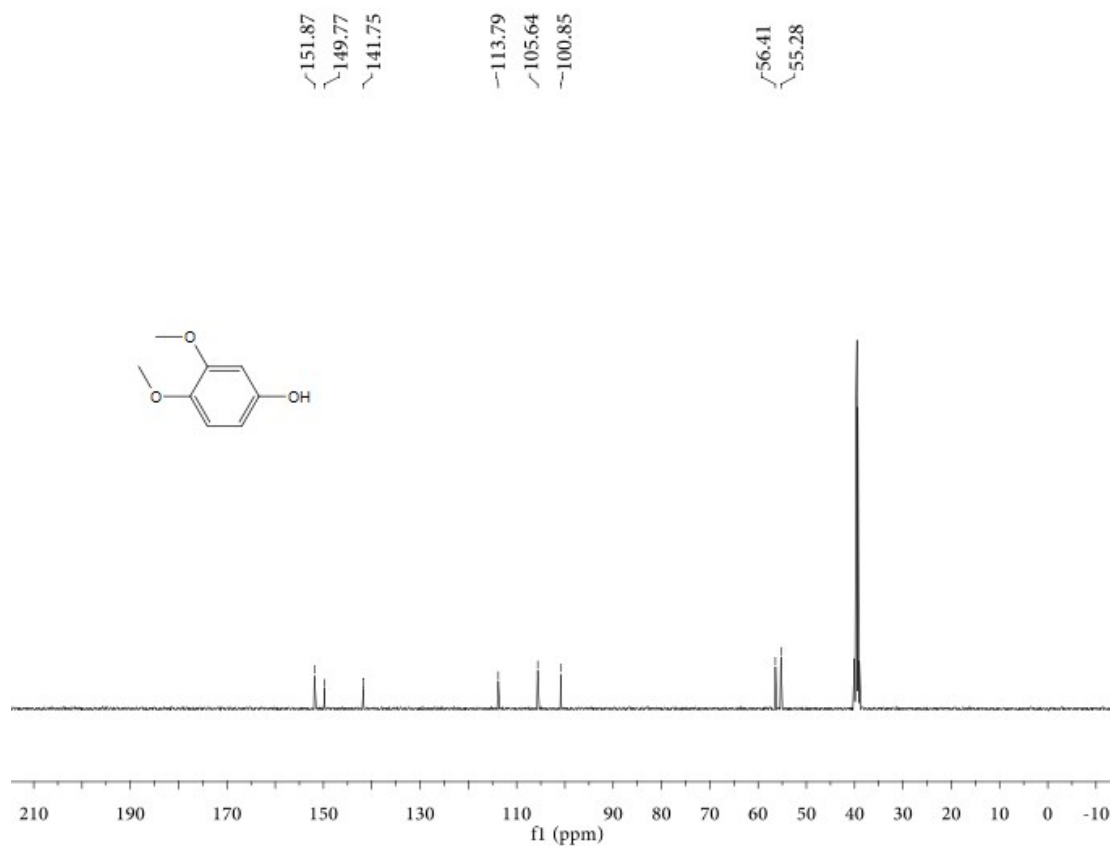

**Figure S41.**  $^1\text{H}$  NMR of **39b** (400 MHz,  $\text{DMSO-}d_6$ ) and  $^{13}\text{C}$  NMR of **39b** (125 MHz,  $\text{DMSO-}d_6$ )

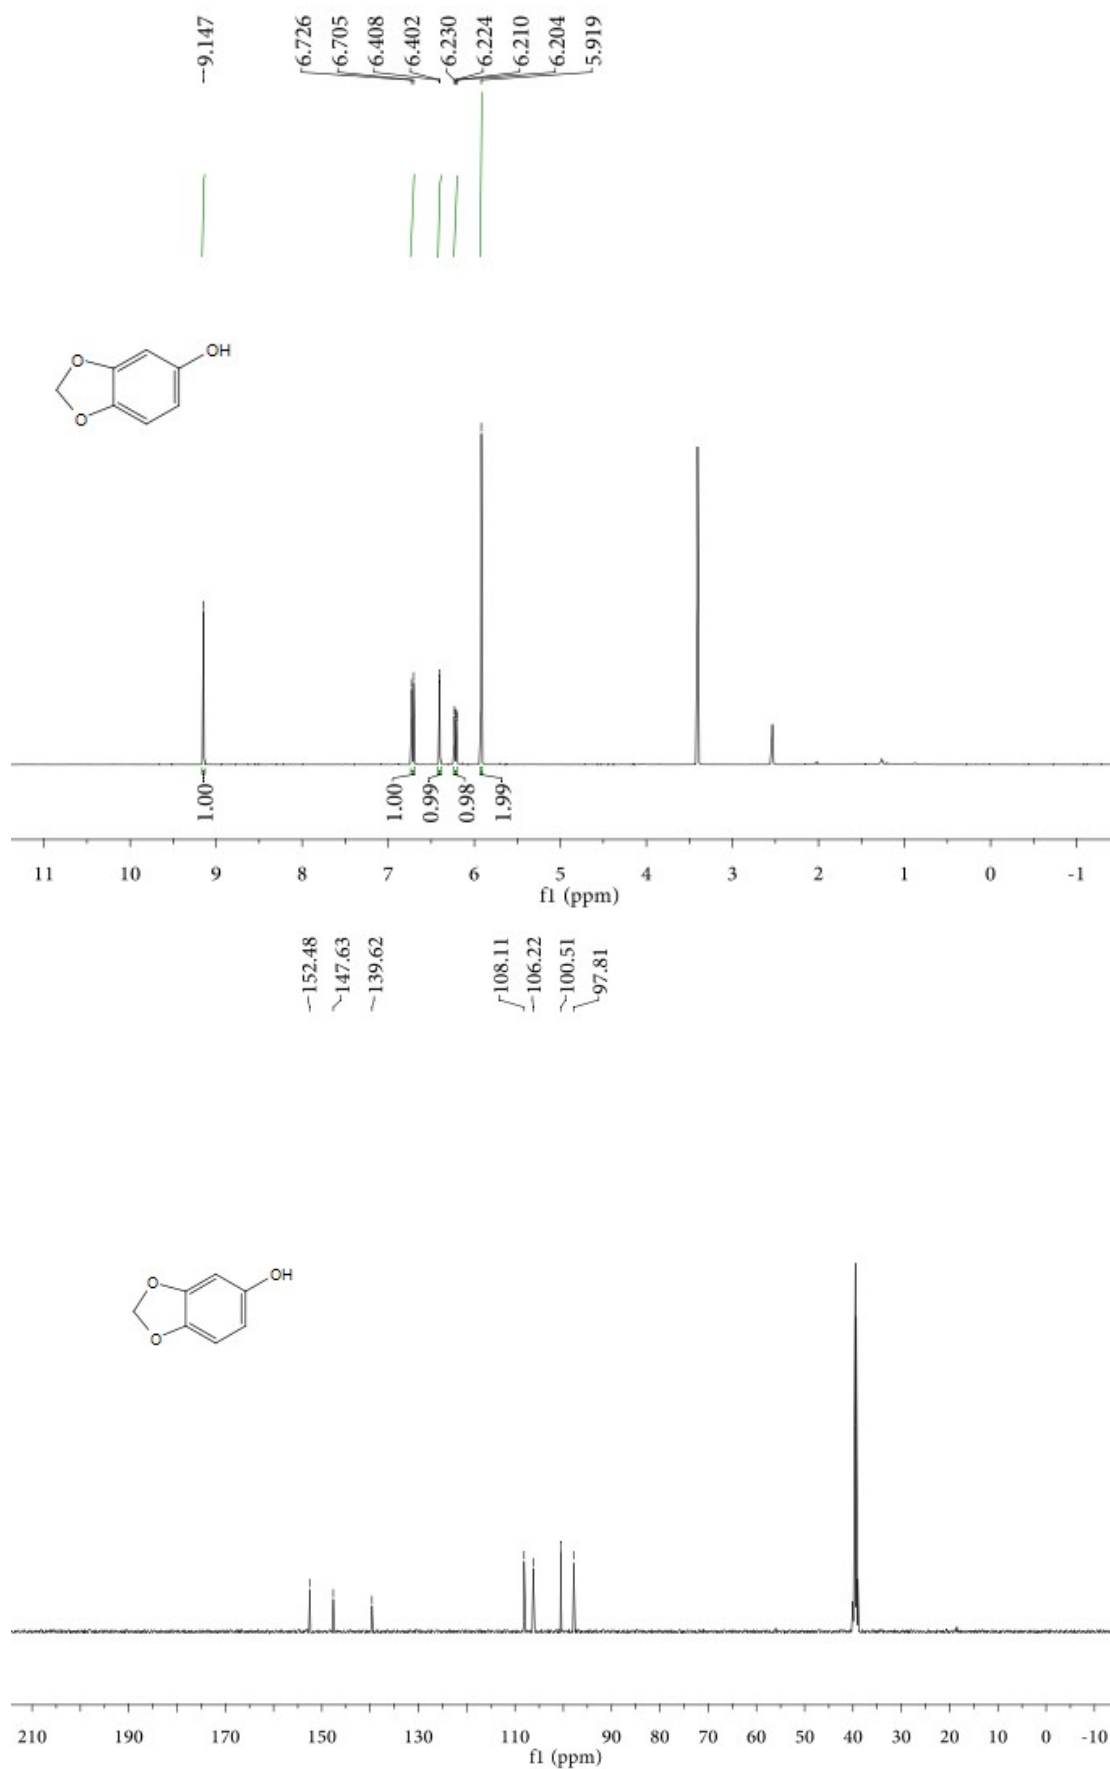

**Figure S42.** <sup>1</sup>H NMR of **40b** (400 MHz, DMSO-*d*<sub>6</sub>) and <sup>13</sup>C NMR of **40b** (125 MHz, DMSO-*d*<sub>6</sub>)



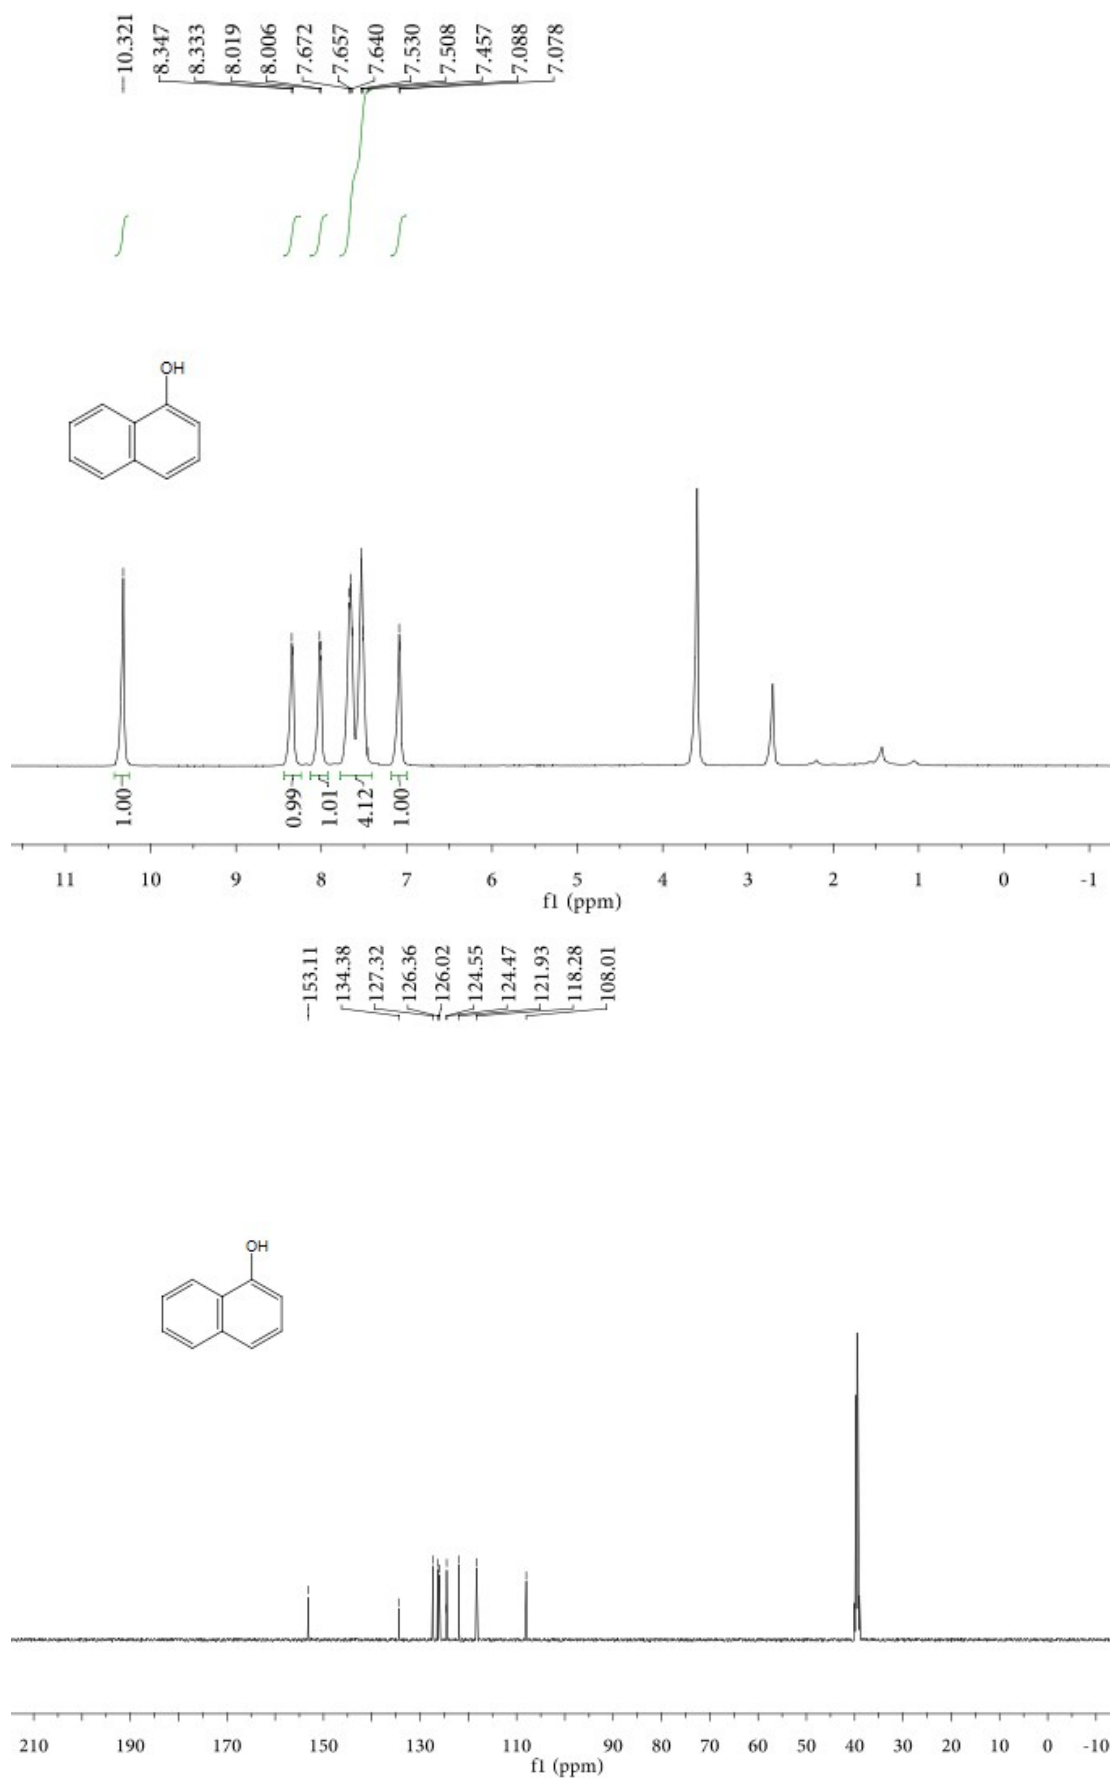

**Figure S43.** <sup>1</sup>H NMR of **43b** (500 MHz, DMSO-*d*<sub>6</sub>) and <sup>13</sup>C NMR of **43b** (125 MHz, DMSO-*d*<sub>6</sub>)

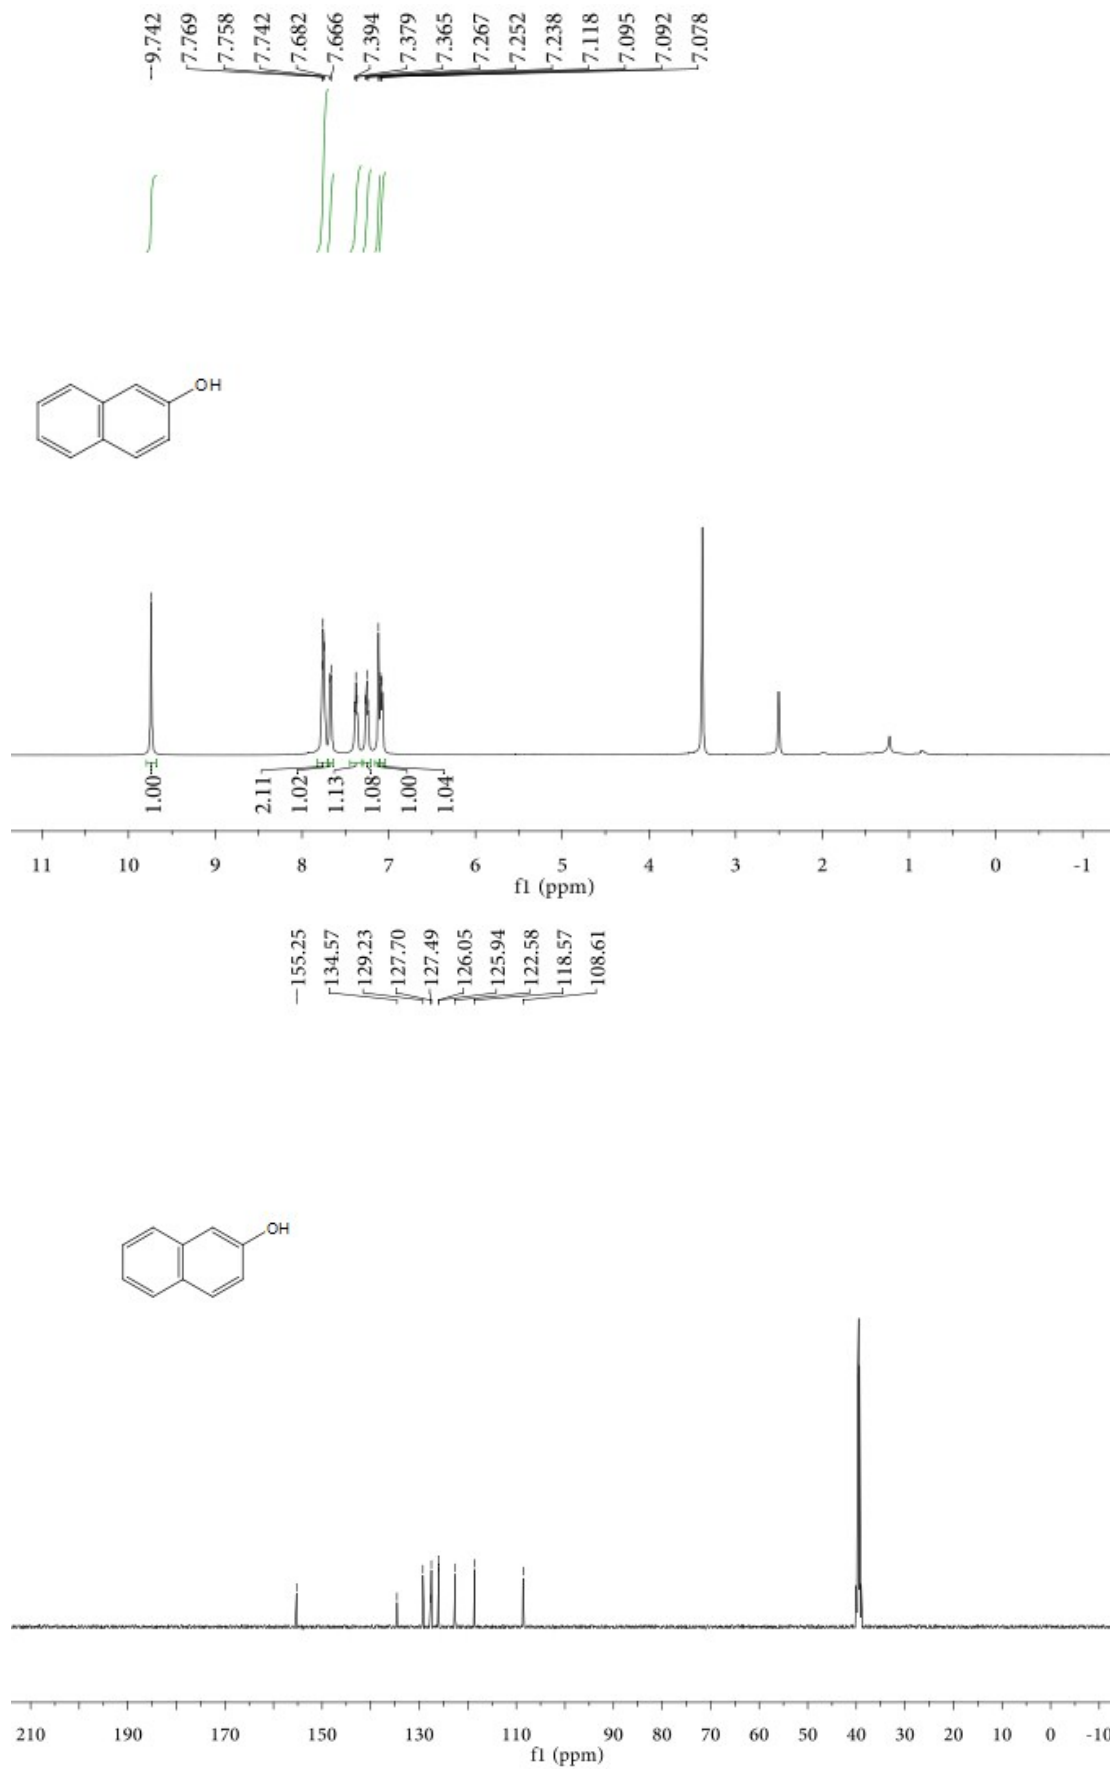

**Figure S44.** <sup>1</sup>H NMR of **44b** (500 MHz, DMSO-*d*<sub>6</sub>) and <sup>13</sup>C NMR of **44b** (125 MHz, DMSO-*d*<sub>6</sub>)

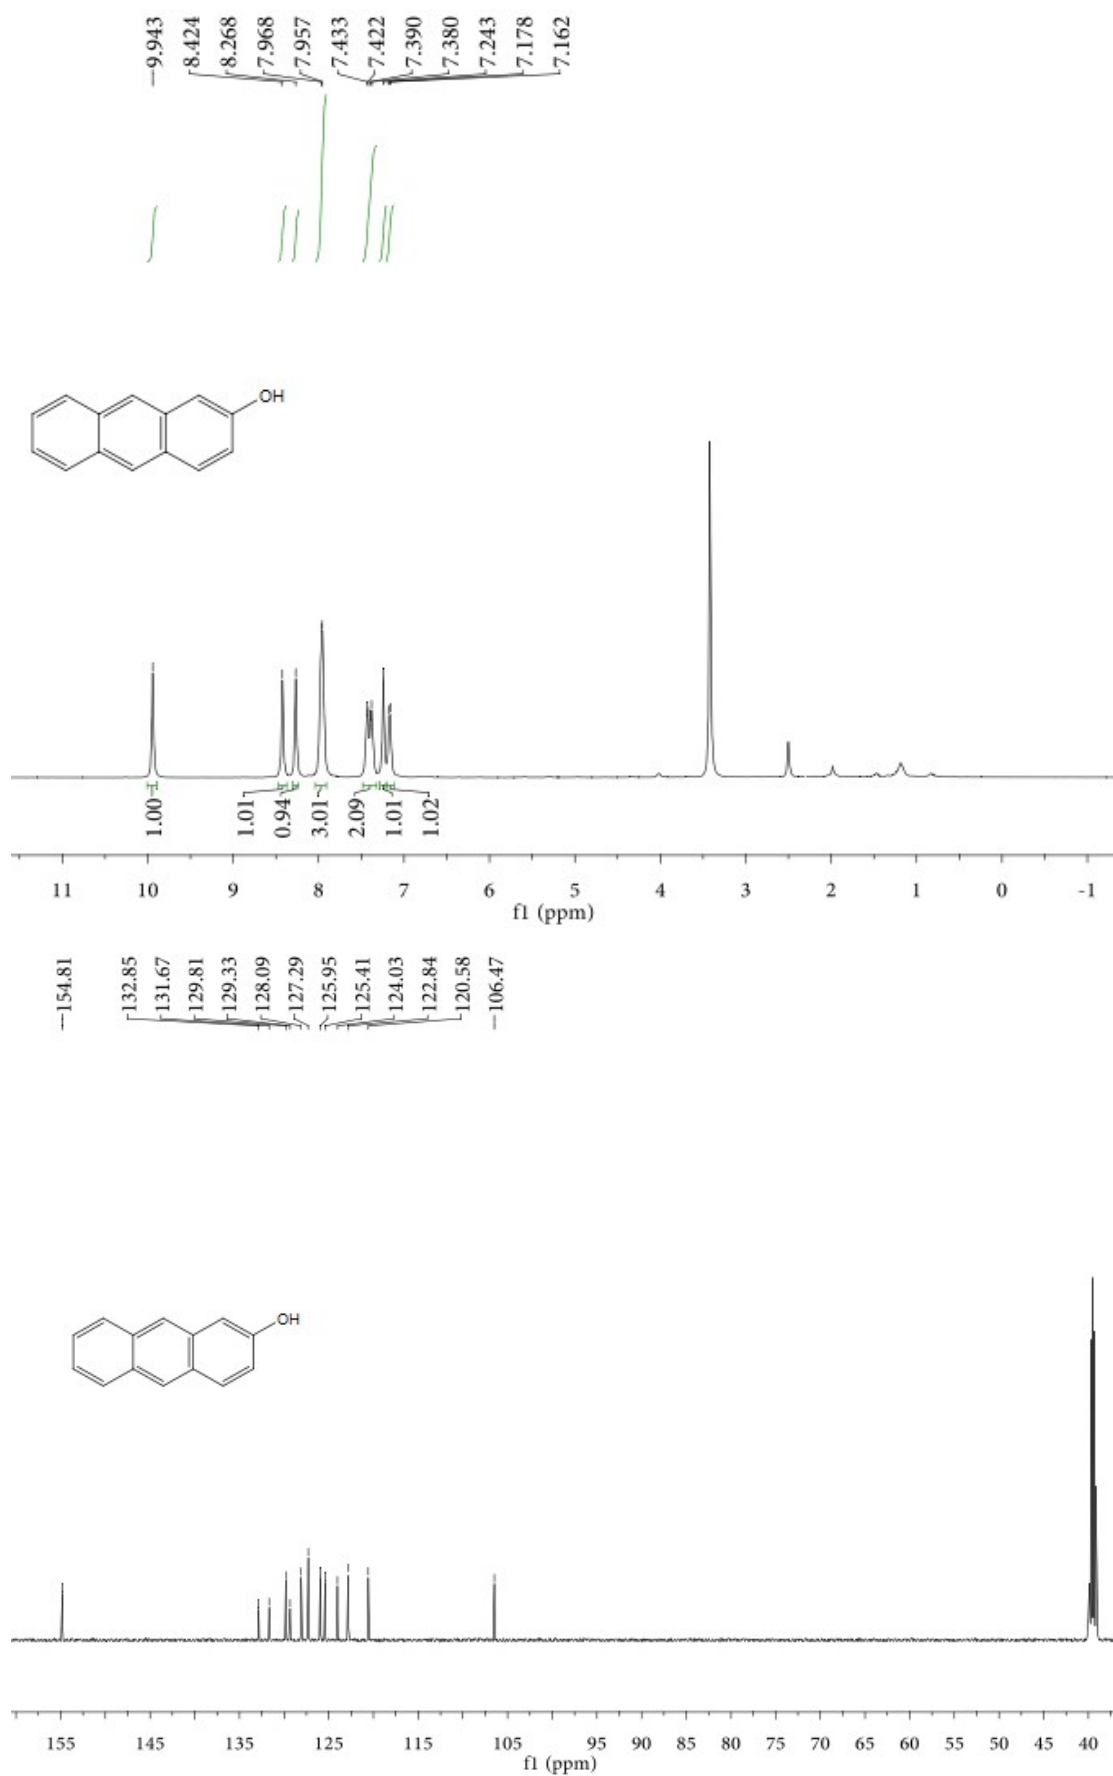

**Figure S45.** <sup>1</sup>H NMR of **45b** (500 MHz, DMSO-*d*<sub>6</sub>) and <sup>13</sup>C NMR of **45b** (125 MHz, DMSO-*d*<sub>6</sub>)

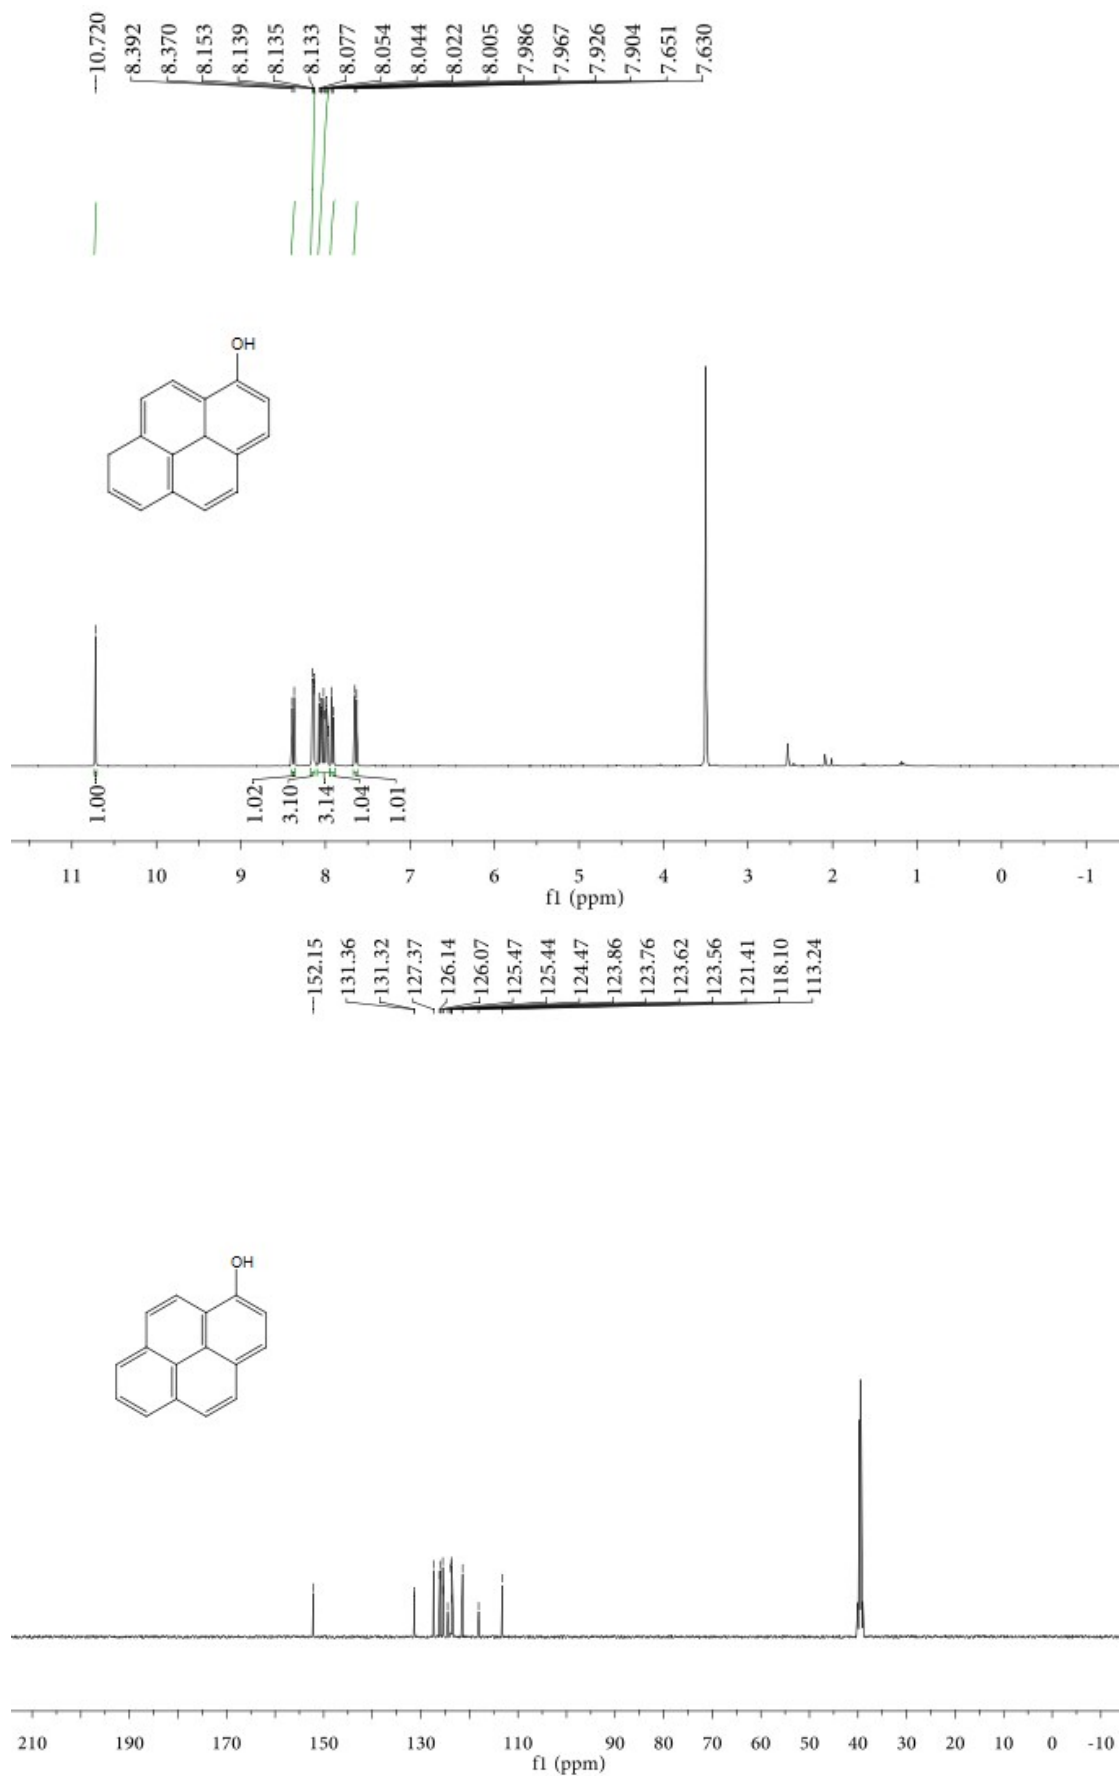

**Figure S46.** <sup>1</sup>H NMR of **46b** (400 MHz, DMSO-*d*<sub>6</sub>) and <sup>13</sup>C NMR of **46b** (125 MHz, DMSO-*d*<sub>6</sub>)

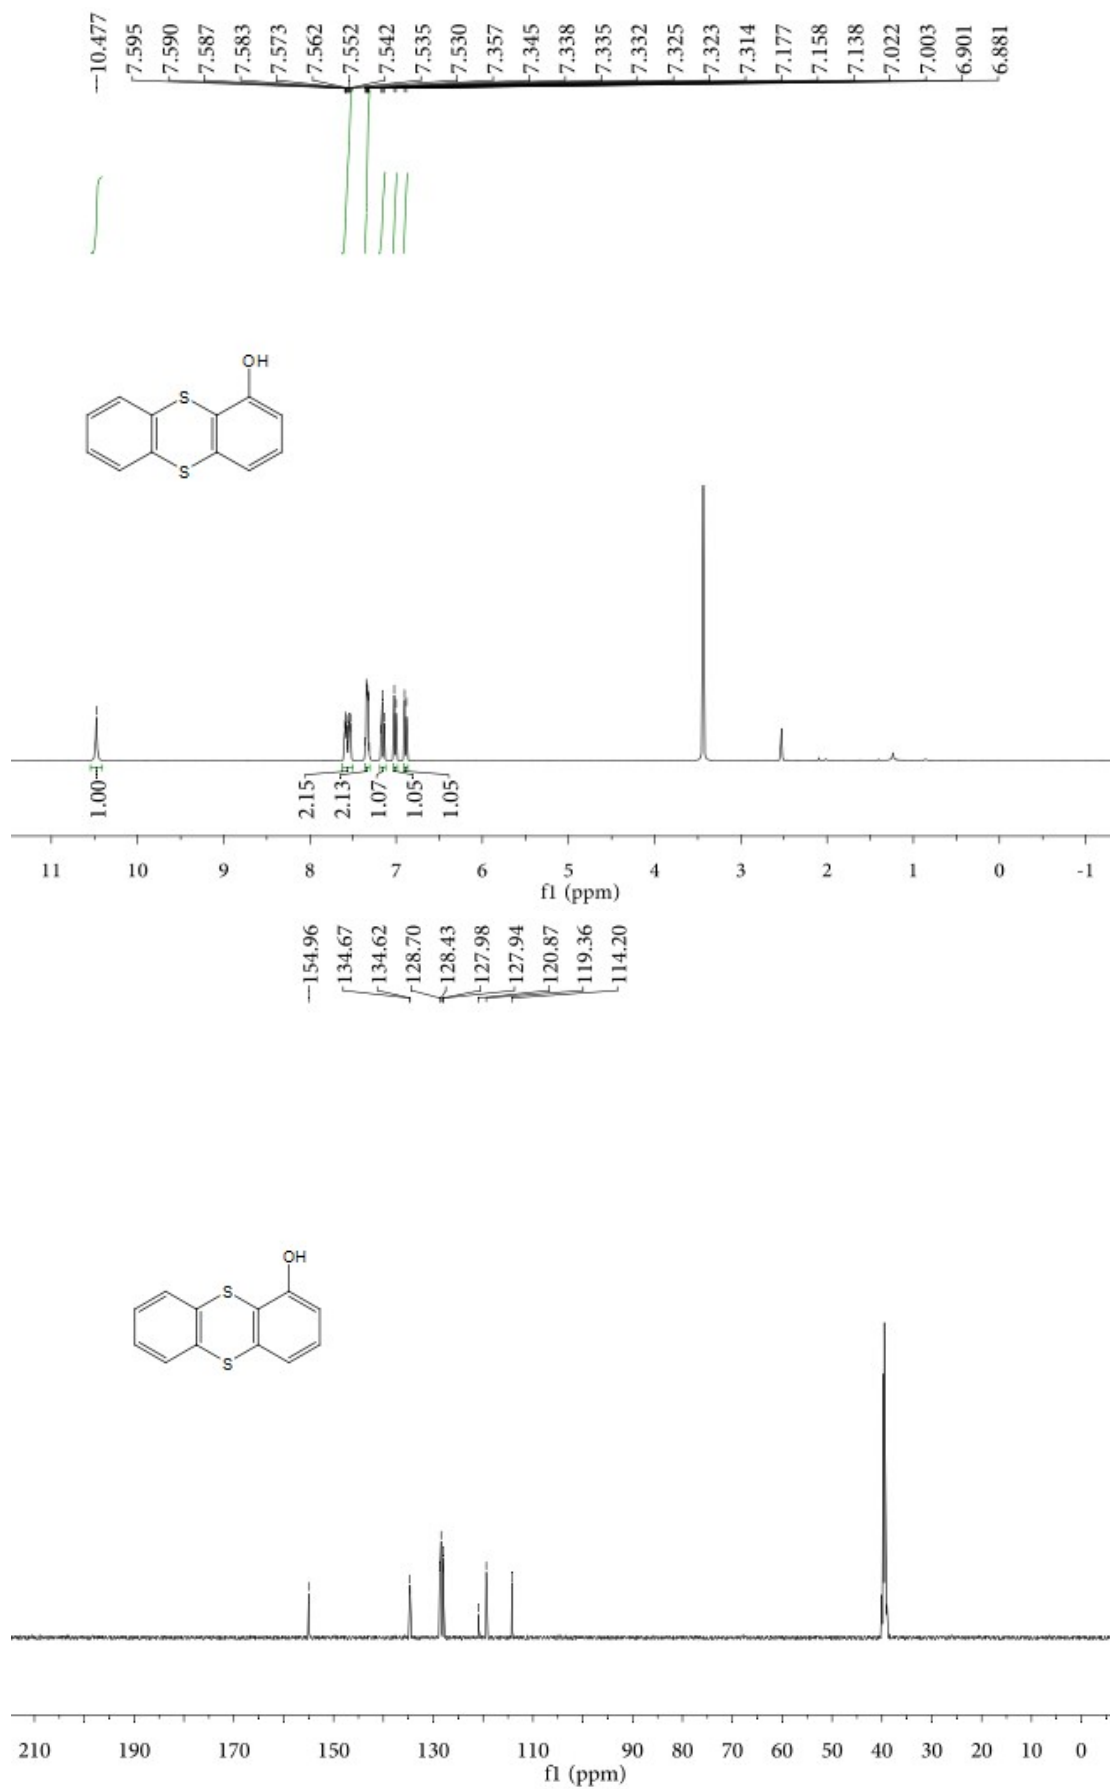

**Figure S47.** <sup>1</sup>H NMR of **47b** (400 MHz, DMSO-*d*<sub>6</sub>) and <sup>13</sup>C NMR of **47b** (125 MHz, DMSO-*d*<sub>6</sub>)

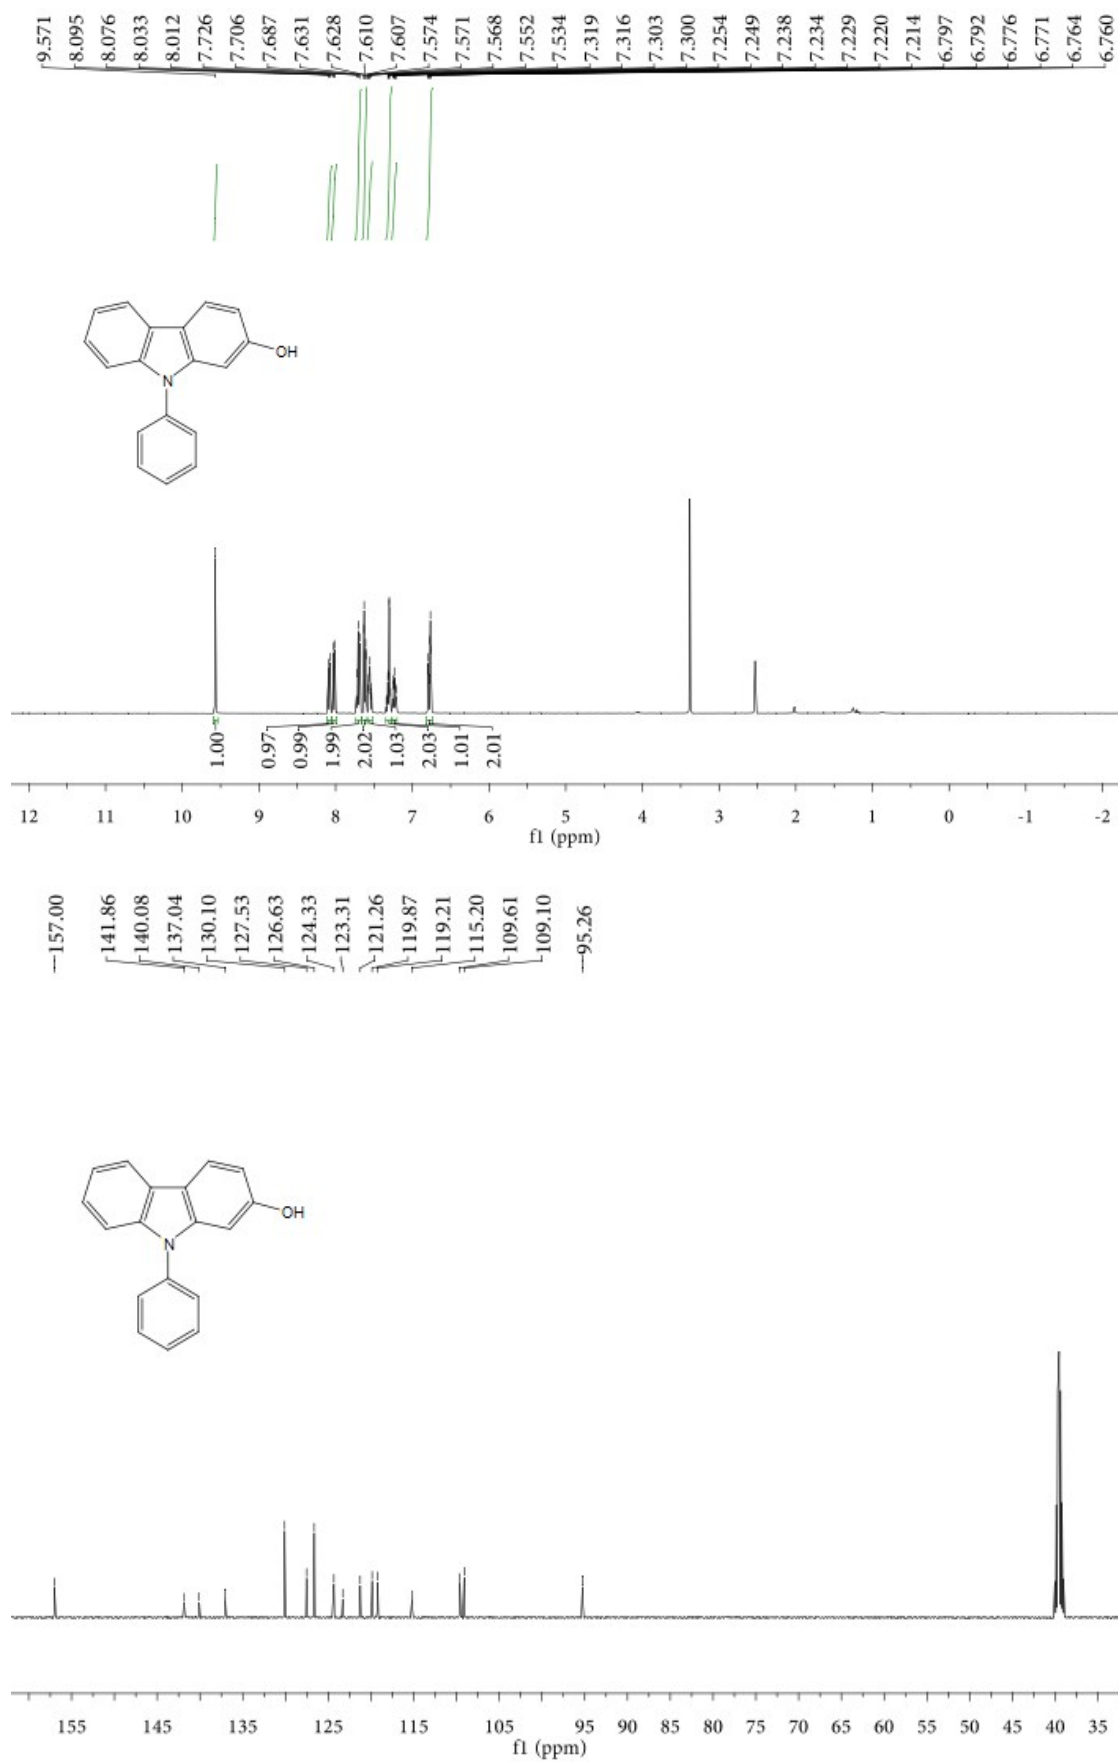

**Figure S48.** <sup>1</sup>H NMR of **48b** (400 MHz, DMSO-*d*<sub>6</sub>) and <sup>13</sup>C NMR of **48b** (125 MHz, DMSO-*d*<sub>6</sub>)

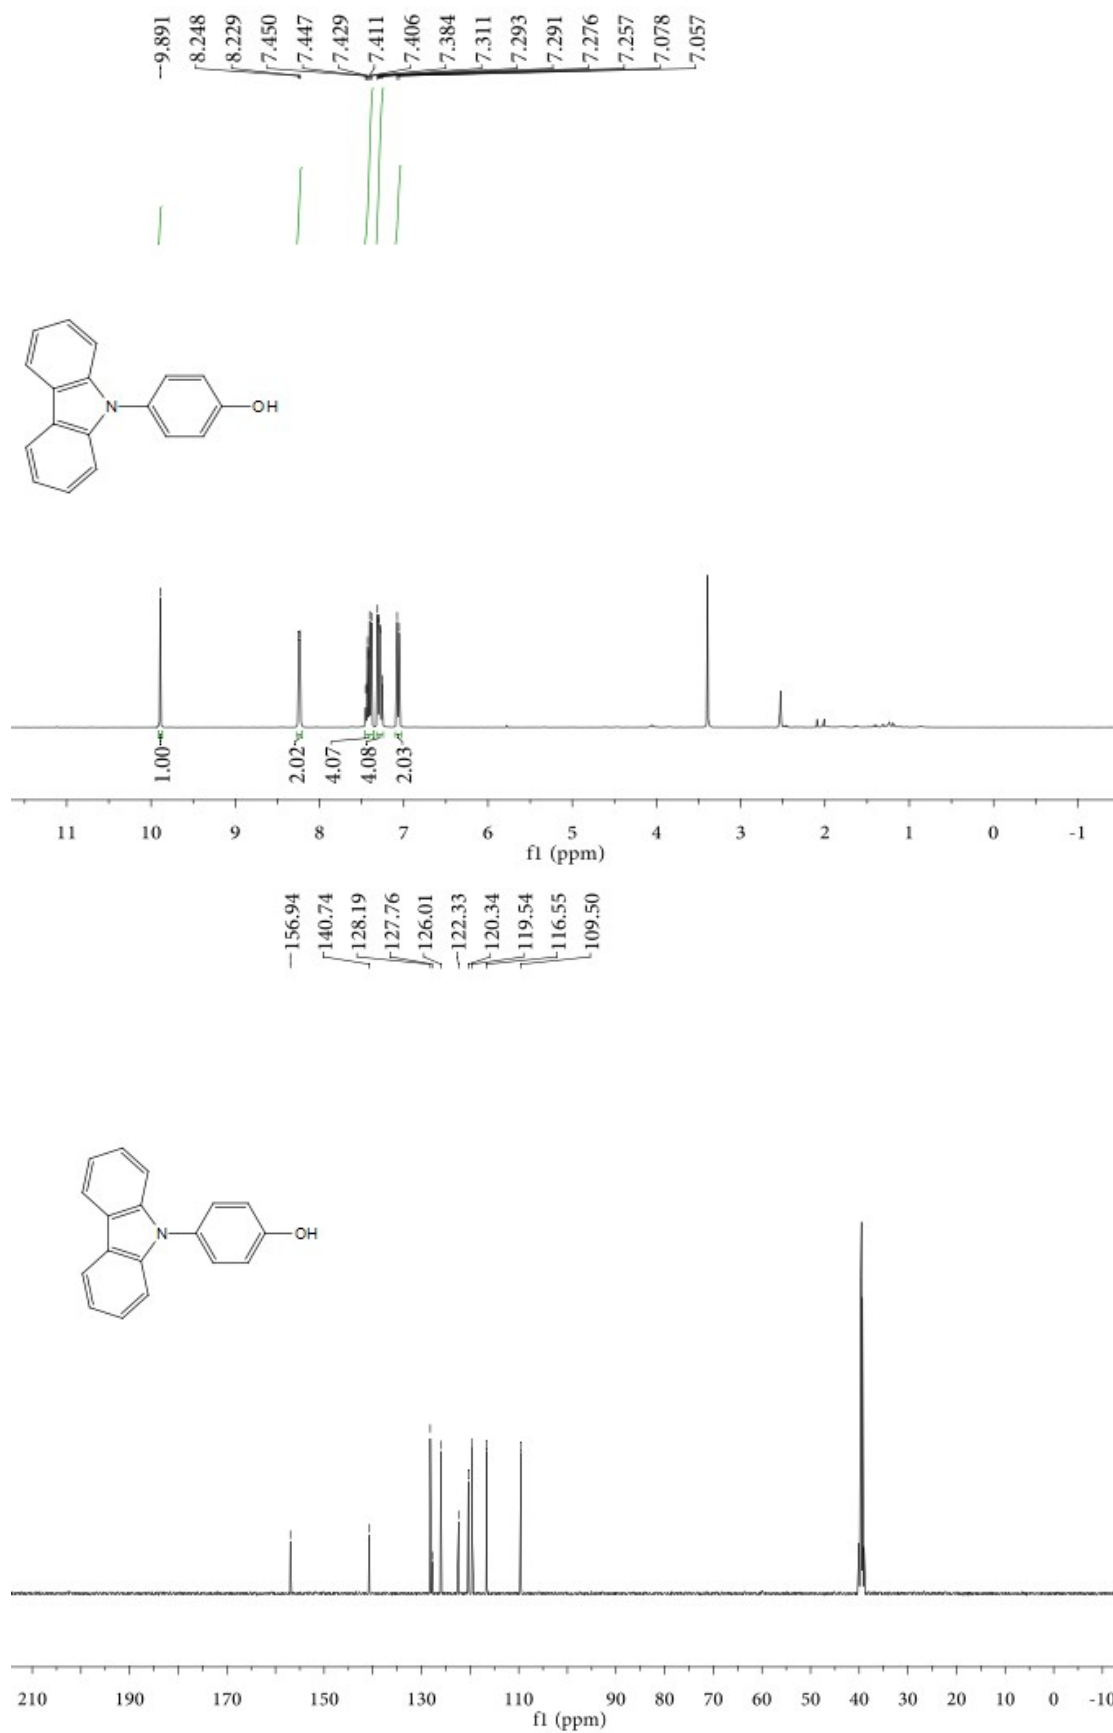

**Figure S49.** <sup>1</sup>H NMR of **49b** (400 MHz, DMSO-*d*<sub>6</sub>) and <sup>13</sup>C NMR of **49b** (125 MHz, DMSO-*d*<sub>6</sub>)

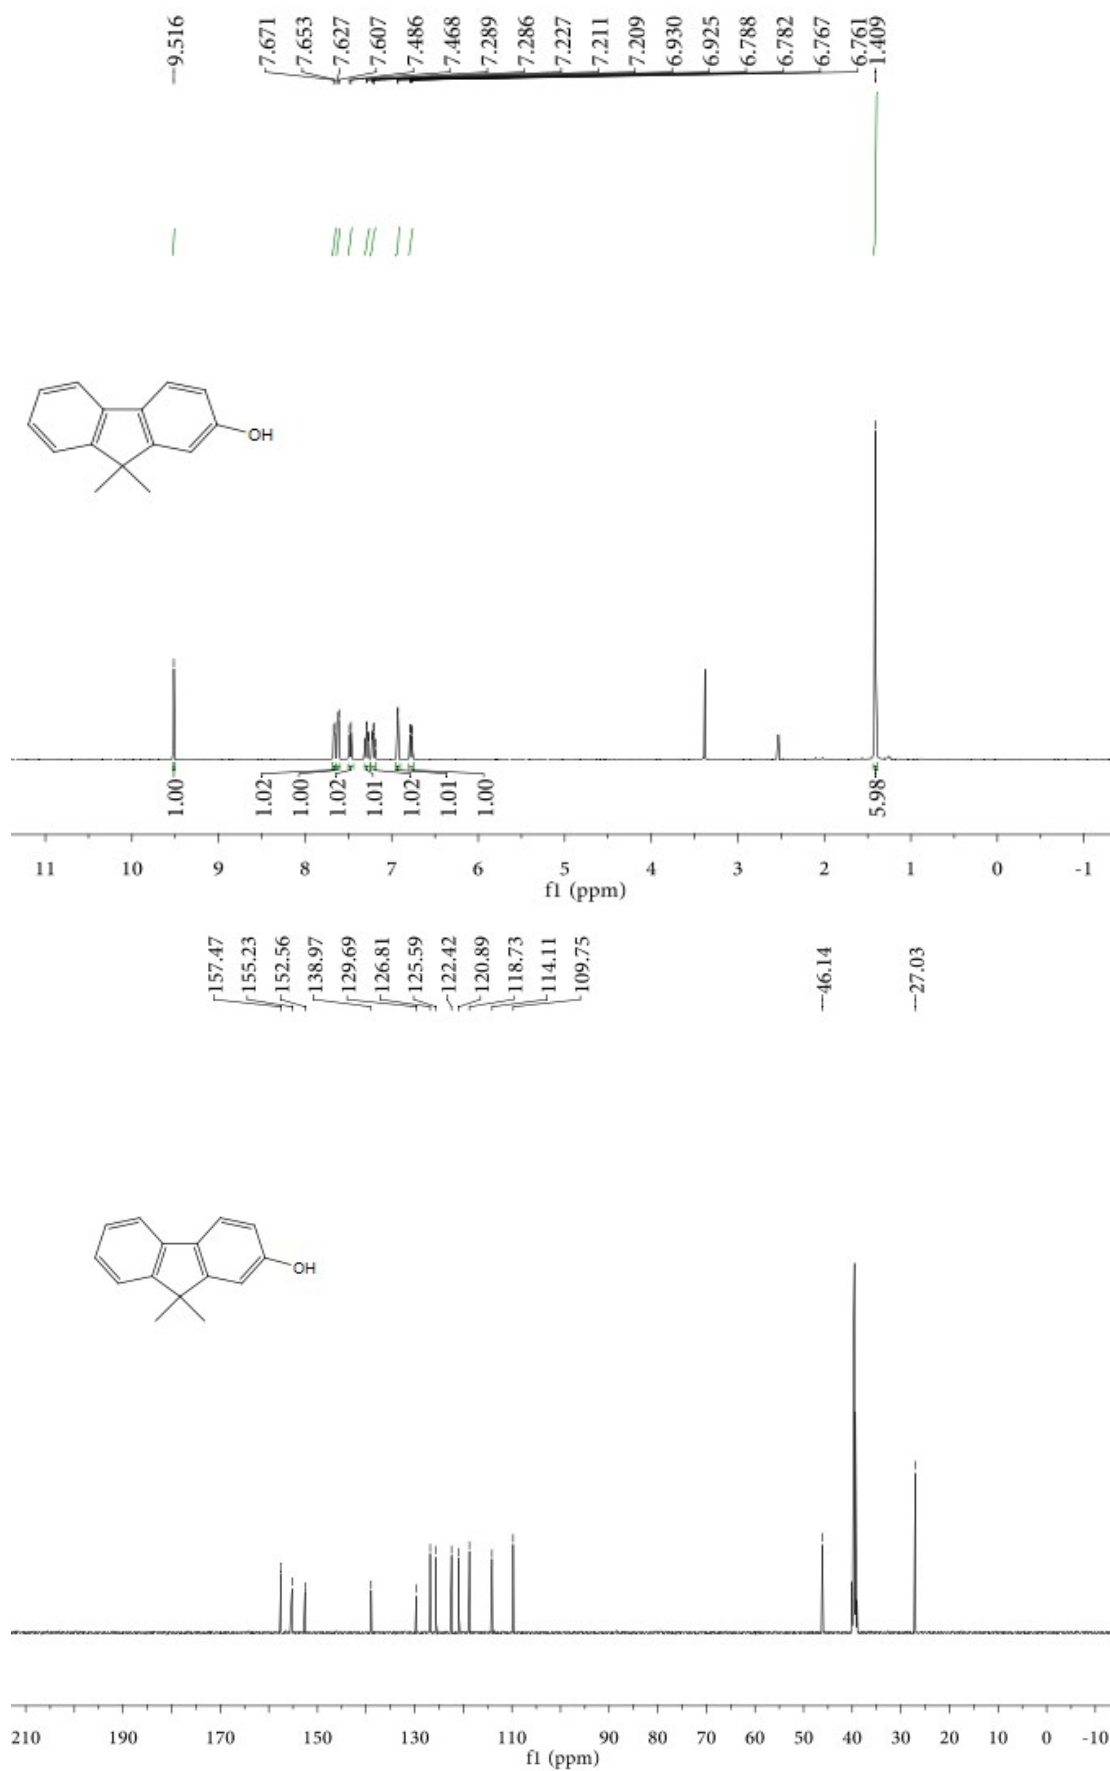

**Figure S50.** <sup>1</sup>H NMR of **50b** (400 MHz, DMSO-*d*<sub>6</sub>) and <sup>13</sup>C NMR of **50b** (125 MHz, DMSO-*d*<sub>6</sub>)



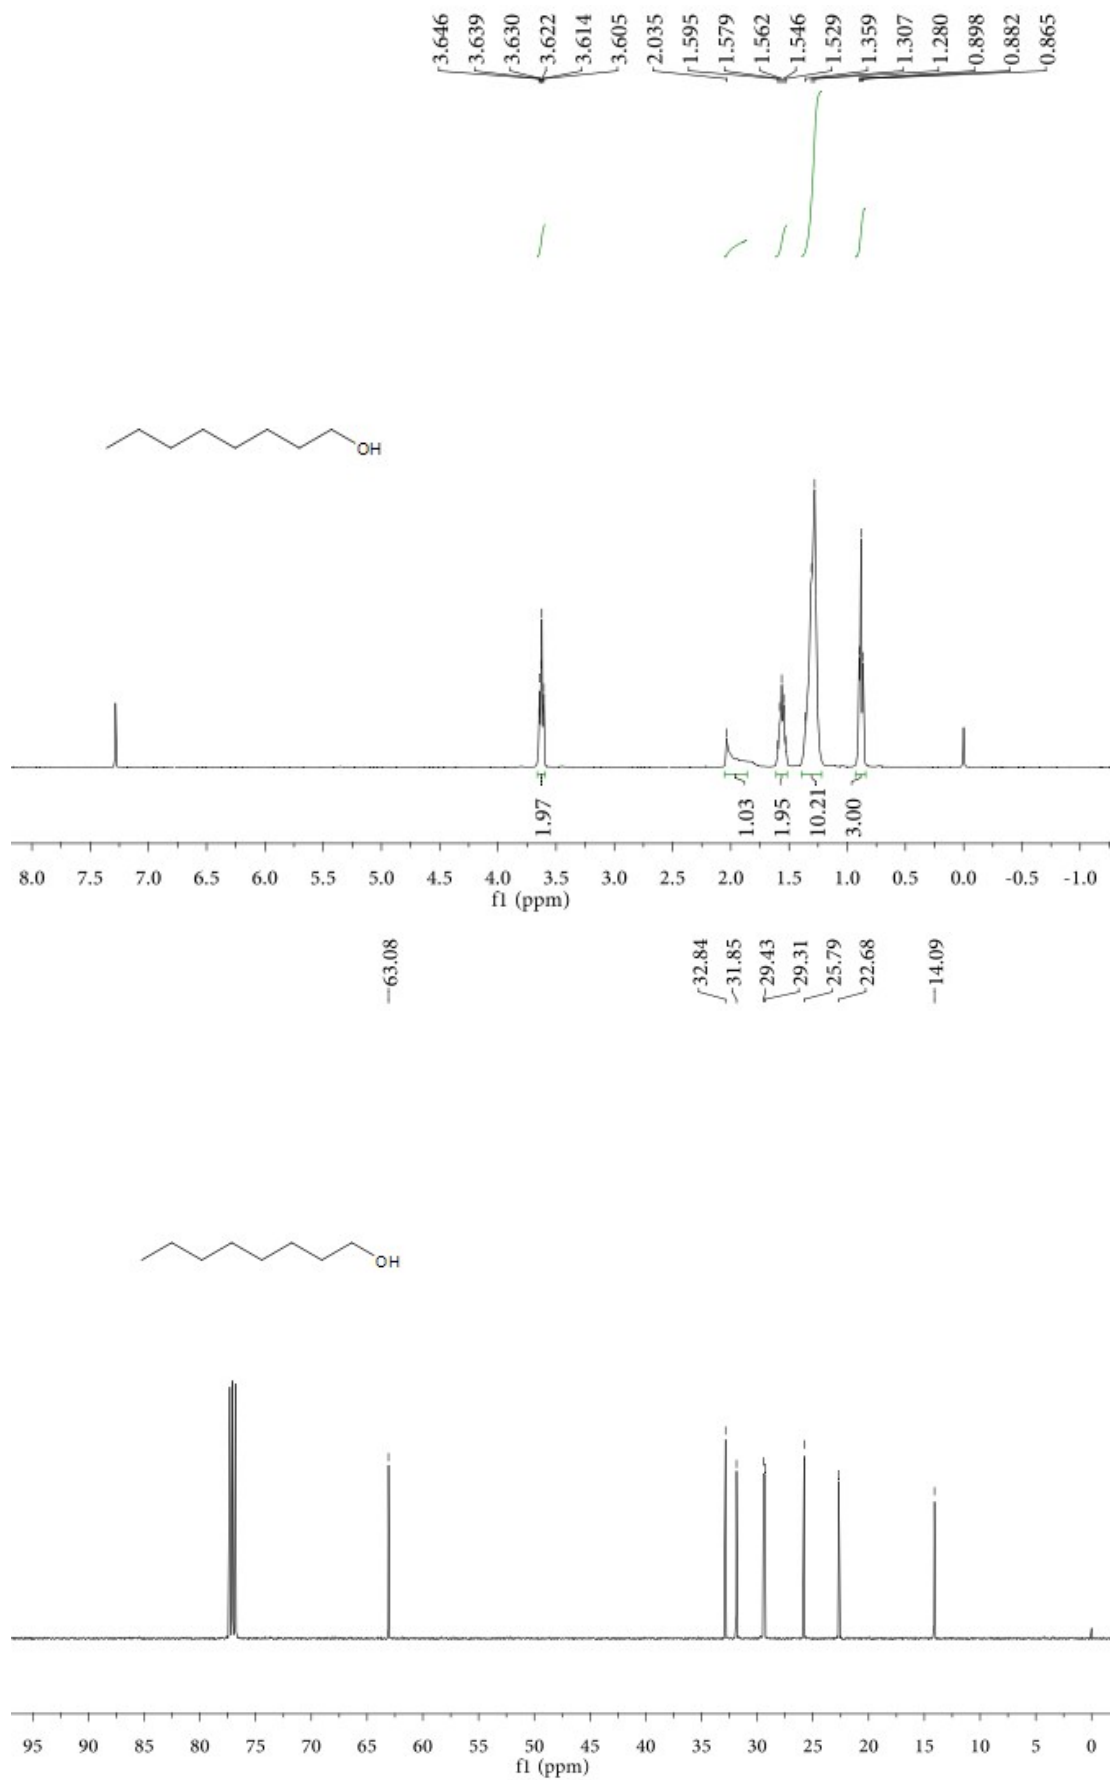

**Figure S51.** <sup>1</sup>H NMR of **51b** (400 MHz, CDCl<sub>3</sub>) and <sup>13</sup>C NMR of **51b** (125 MHz, CDCl<sub>3</sub>)

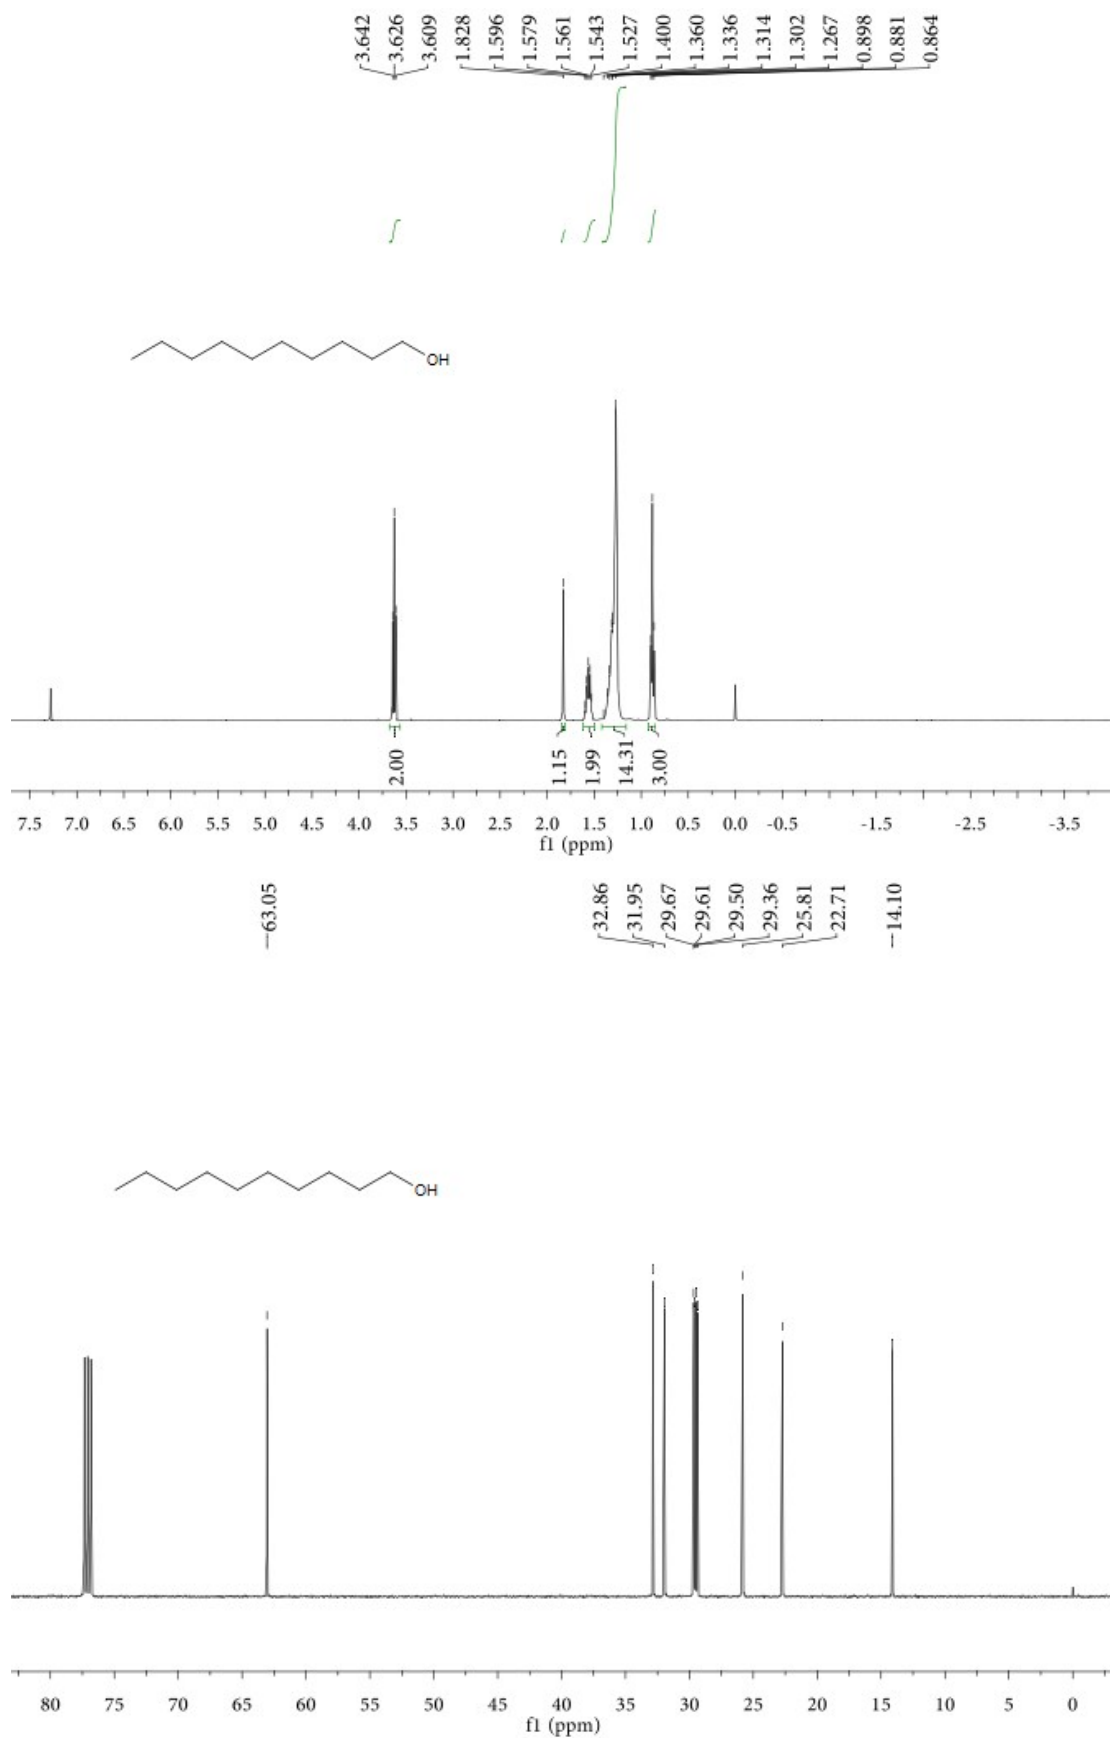

**Figure S52.** <sup>1</sup>H NMR of **52b** (400 MHz, CDCl<sub>3</sub>) and <sup>13</sup>C NMR of **52b** (125 MHz, CDCl<sub>3</sub>)
